# Supplementary material for: Investments in cancer research awarded to UK institutions and the global burden of cancer 2000–2013: a systematic analysis
Source: PubMed Central journal article supplement — BMJ Open. 2017 Apr 20;7(4):e013936. doi: 10.1136/bmjopen-2016-013936 (PMC5775472; doi:10.1136/bmjopen-2016-013936), 2017-04-20
Supplement: bmjopen-2016-013936.draft_revisions.pdf [file bmjopen-2016-013936.draft_revisions.pdf]

# BMJ Open

## Investments in cancer research awarded to UK institutions and the global burden of cancer 2000-2013: a systematic analysis

|                                 |                                                                                                                                                                                                                                                                                                                                       |
|---------------------------------|---------------------------------------------------------------------------------------------------------------------------------------------------------------------------------------------------------------------------------------------------------------------------------------------------------------------------------------|
| Journal:                        | <i>BMJ Open</i>                                                                                                                                                                                                                                                                                                                       |
| Manuscript ID                   | bmjopen-2016-013936                                                                                                                                                                                                                                                                                                                   |
| Article Type:                   | Research                                                                                                                                                                                                                                                                                                                              |
| Date Submitted by the Author:   | 18-Aug-2016                                                                                                                                                                                                                                                                                                                           |
| Complete List of Authors:       | Maruthappu, Mahiben<br>Head, Michael; University College London, Infection & Population Health<br>Zhou, Charlie; University of Oxford,<br>Gilbert, Barnabas<br>El-Harasis, Majd<br>Raine, Rosalind<br>Fitchett, Joseph; King's College London, School of Medicine<br>Atun, Rifat; Harvard University, Harvard School of Public Health |
| <b>Primary Subject Heading</b>: | Health policy                                                                                                                                                                                                                                                                                                                         |
| Secondary Subject Heading:      | Global health, Health economics, Oncology, Public health                                                                                                                                                                                                                                                                              |
| Keywords:                       | ONCOLOGY, research investment, global burden of disease, global health, funding, research and development                                                                                                                                                                                                                             |
|                                 |                                                                                                                                                                                                                                                                                                                                       |

SCHOLARONE™  
Manuscripts

Only

1  
2  
3 **Investments in cancer research awarded to UK institutions and the global burden of cancer 2000-**  
4 **2013: a systematic analysis**

5  
6 Mahiben Maruthappu<sup>a,\*</sup> Michael G Head<sup>b,\*</sup> Charlie Da Zhou<sup>c</sup>, Barnabas J Gilbert<sup>d</sup>, Majd A El-Harasis<sup>e</sup>,  
7 Rosalind Raine<sup>f</sup>, Joseph R Fitchett<sup>g</sup>, Rifat Atun<sup>g</sup>  
8

9 a Senior Fellow to the CEO of NHS England, Epidemiology and Public Health, University College  
10 London, 1-19 Torrington Place, London, WC1E 6BT, UK  
11

12 b Senior Research Fellow, Global Health Research Institute, Institute for Life Sciences, Faculty of  
13 Medicine, University of Southampton, Southampton, SO17 1BJ, UK  
14

15 c Doctor, Medical Sciences Division, University of Oxford, Oxford OX1 2JD, UK  
16

17 d Doctor, Harvard University, Cambridge, MA 02138, USA.  
18

19 e Doctor, Faculty of Medicine, Imperial College London, London, SW7 2AZ, UK.  
20

21 f Professor, Department of Applied Health Research, UCL, London, WC1E 7HB  
22

23 g Professor, Harvard T. H. Chan School of Public Health, Harvard University, Boston, MA 02115, USA  
24

25  
26 \* Authors Maruthappu and Head to be recognised as joint first-author  
27

28  
29 **Corresponding author**  
30

31 Charlie Zhou  
32

33 [chazhou@gmail.com](mailto:chazhou@gmail.com)  
34

35 New College, Holywell Street, Oxford, OX1 3BN, UK  
36

37 **Short title**

38 UK investments in oncology research  
39

40 **Word count**

41 4509  
42

43 **Number of references**

44 22  
45

46 **Keywords**  
47

48 cancer; oncology; research investment; global burden of disease; global health; funding; research  
49 and development  
50  
51  
52  
53  
54  
55  
56  
57  
58  
59  
60

1  
2  
3 **What this study adds:**  
4

5  
6 **What is already known on this subject:**  
7

8  
9 Prior to this study, we were unable to identify any studies investigating cancer research investment  
10  
11 by the UK over time or any centralised database detailing public and philanthropic cancer research  
12  
13 investment.  
14

15  
16 **What this study adds:**  
17

18  
19 We systematically compiled a comprehensive database for UK research funding for the period 2000-  
20  
21 2013. We identify 4,299 awards with a total research investment of UK£2.4 billion. We generated a  
22  
23 compound metric to capture cancer research investment relative to disease burden. We identify  
24  
25 several potential investment “gaps”, for example, funding towards surgery and radiotherapy are  
26  
27 comparatively neglected considering their utility in the cancer care pathway  
28  
29  
30  
31  
32  
33  
34  
35  
36  
37  
38  
39  
40  
41  
42  
43  
44  
45  
46  
47  
48  
49  
50  
51  
52  
53  
54  
55  
56  
57  
58  
59  
60

**ABSTRACT****Objectives**

We sought to systematically categorise cancer research investment awarded to UK institutions in the period 2000-2013 and to estimate research investment relative to disease burden as measured by mortality, disability-adjusted life years (DALYs), and years lived with disability (YLDs).

**Design**

Systematic analysis of all open access data.

**Setting and participants**

Public and philanthropic funding to all UK cancer research institutions, 2000-2013

**Main outcome measures**

Number and financial value of cancer research investment reported in 2013 UK pounds. Mortality, DALYs and YLDs data was acquired from the Global Burden of Diseases Study. A compound metrics was adapted to estimate research investment relative to disease burden as measured by mortality, DALYs, and YLDs.

**Results**

We identified 4,299 funded studies with a total research investment of UK£2.4 billion. The highest funding by sites were haematological, breast, prostate, colorectal, and ovarian cancers. Relative to disease burden as determined by a compound metric combining mortality, DALYs and YLDs, gender-specific cancers were found to be highest funded - the five sites that received the most funding were prostate, ovarian, breast, mesothelioma, and testicular cancer; the least well-funded sites were liver, thyroid, lung, upper GI and bladder. Pre-clinical science accounted for 66.2% of award numbers and 62.2% of all funding. The top five areas of primary research focus by funding were pathogenesis, drug therapy, diagnostic, screening and monitoring, women's health, and immunology. The largest

1  
2  
3 individual funder was the Medical Research Council. In combination, the five lowest funded site  
4  
5 specific cancers relative to disease burden account for 47.9%, 44.3% and 20.4% of worldwide cancer  
6  
7 mortality, DALYs and YLDs.  
8  
9

## 10 **Conclusions**

11  
12 Current and projected global cancer disease burden may be a consideration in the allocation of  
13  
14 limited research funding. Funding agencies and industry need to openly document their research  
15  
16 investment to enable the development of transparent and objective methods to allocate funding.  
17  
18  
19

## 20 **Strengths and limitations of this study:**

- 21  
22
- 23 • We systematically analyse UK investment in cancer research and identify areas of relative  
24 neglect.
  - 25 • Our findings will inform funders and contribute towards policy discussions to prevent  
26 inequity in the allocation of limited resources
  - 27 • However, it is not possible to equate gaps in funding with areas of neglect without  
28 consideration of other influences.
  - 29 • Our study is dependent on the accuracy of original investment data from the funding bodies
  - 30 • Assignment of disease categories and allocation of studies according to these categories is  
31 subjective.
  - 32 • We could not openly access data of private sector research funding, nor were we able to  
33 obtain disaggregated award data from CRUK.
  - 34 • Disease burden measures are typically an estimate and are subject to the potential  
35 introduction of bias.  
36  
37  
38  
39  
40  
41  
42  
43  
44  
45  
46  
47  
48  
49  
50  
51  
52  
53  
54  
55  
56  
57  
58  
59  
60

## Introduction

Cancers account for a high burden of morbidity and mortality worldwide. The Global Burden of Disease (GBD) Study estimates that cancer of all types resulted in 8,235,700 deaths in 2013[1]. Being predominantly a disease of older age, prevalence of cancers has historically fallen among high-income countries. However as low-income countries experience economic maturation, we are seeing an expanded distribution of this disease burden. Further deaths from cancer are projected due to global population growth and ageing[2,3]. Between 1990 and 2013, the proportion of all deaths that was attributable to cancer rose from 11.9% to 15.0%, largely among low- and middle-income countries and site-specific cancers accounted for 9 of the 50 leading causes of death, worldwide[1].

The socioeconomic impact of cancer, both in terms of direct costs involved in medical management as well as indirect costs resulting from productivity loss, on patients and caregivers are substantial. Direct health-related costs of cancer have been estimated to incur €51.0 billion within in the European Union[4] and \$124.5 billion in the United States[5]. Indirect costs are estimated to account for additional losses of €75.2 billion and \$115.8 billion, respectively. Economic evaluation of the impact of cancer outside of these two geographical regions has been lacking.

Investment in research and development (R&D) for cancers produces global public benefits that have a positive effect both locally and worldwide, irrespective of the site of the work or the location of the institution receiving an award, bringing substantial health, social, and economic benefit.

There are several national and international funding bodies that make cancer research investments along the R&D pipeline, from population health research, pre-clinical studies through to clinical trials and applied research. The UK remains one of the world's leading investors and producers of global biomedical and health research. Previous analyses by the Research Investments in Global Health study (ResIn, [www.researchinvestments.org](http://www.researchinvestments.org)) has systematically analysed public and philanthropic

1  
2  
3 awards totalling £3.7 billion to UK institutions for infectious disease from 1997 to 2013, and  
4  
5 evaluated funding against global disease burden[6,7] and publications and citations as a marker of  
6  
7 research output[8]. Tracking investments in R&D provides information and evidence to inform  
8  
9 funding decisions and priority setting. Here, we present a systematic analysis of cancer-related  
10  
11 research awarded by public and philanthropic funders to UK institutions from 2000 to 2013,  
12  
13 categorise the data against a range of cancer-specific and cross-cutting disease areas, and assess the  
14  
15 award data against global measures of mortality, disability-adjusted life years (DALYs), and years  
16  
17 lived with disability (YLD) across three time points.  
18  
19

## 20 21 **Methods**

22  
23 Our methods build on those developed for the infectious disease research investment analysis,  
24  
25 which are described in detail elsewhere[6,7] and adapted in subsequent peer-reviewed publications  
26  
27 ([www.researchinvestments.org/publications](http://www.researchinvestments.org/publications)).  
28  
29

30  
31 We systematically examined funding awards from a number of public and philanthropic funding  
32  
33 bodies (including the Medical Research Council, Department of Health, Biotechnology and Biological  
34  
35 Sciences Research Council, Engineering and Physical Science Research Council, Wellcome Trust,  
36  
37 European Commission, as well as 9 members of the Association of Medical Research Charities)  
38  
39 between 2000 and 2013. Information was obtained by downloading openly-accessible information  
40  
41 on the funder website, contacting the funder to request the information, or searching existing  
42  
43 funding databases. For each award, the title and abstract, where available, were individually  
44  
45 screened for relevance to cancer research. We excluded awards that were i) not obviously or  
46  
47 immediately relevant to oncology; ii) led by a non-UK institution; iii) not considered to be for R&D  
48  
49 activity. Unfunded studies were also excluded. Private sector data were not available to evaluate at  
50  
51 the same level of detail as public and philanthropic research award data, and were therefore  
52  
53 excluded from this analysis. Cancer Research UK (CRUK) would not provide their award data and so  
54  
55 could not be included in the main analysis. There is some description of individual CRUK awards  
56  
57  
58  
59  
60

1  
2  
3 without grant amounts available at <https://europepmc.org/>. We report total number of studies in  
4  
5 this analysis.  
6

7  
8 Where awards were described in currencies other than UK pounds, these were converted to UK  
9  
10 pounds using the mean exchange rate in the year of the award. All included awards were adjusted  
11  
12 for inflation and reported in 2013 UK pounds.  
13

14  
15 Each study in the dataset was reviewed by one author (either CDZ, GJG, MAE-H, MGH) and assigned  
16  
17 to as many of 14 cross-cutting categories as appropriate. The 14 association categories were  
18  
19 paediatric, geriatric, infection-associated, women's health, men's health, occupational health,  
20  
21 pathogenesis, diagnostic/screening/monitoring, drug therapy, radiotherapy, surgery, immunology,  
22  
23 psychosocial and global health. Awards were defined as global health if they were considered to  
24  
25 pursue a clear non-UK focus (e.g. 'thyroid cancer in Kenya'). The other category was only used when  
26  
27 none of the aforementioned categories were deemed to be appropriate. Studies were also allocated  
28  
29 to one of five categories along the R&D pipeline: pre-clinical; phase I, II, or III clinical trials; product  
30  
31 development (including phase IV activity); public health; and cross-disciplinary research. The cross-  
32  
33 disciplinary category was defined as an award containing significant components across two distinct  
34  
35 areas along the R&D pipeline (such as pre-clinical research leading directly into a phase I trial).  
36  
37

38  
39 Provisional datasets were circulated to all authors for review and comment with checks by second  
40  
41 authors on sections of the data and any disagreements settled by consensus. Final datasets were  
42  
43 then again circulated for further review by all authors. Microsoft Excel 2010 and 2013 and Stata  
44  
45 (V13) software were used for data analysis.  
46  
47

48  
49 Global data on mortality, disability-adjusted life years (DALYs) and years lived with disability (YLDs)  
50  
51 were available at time points 2005, 2010 and 2013. All burden data were sourced from the findings  
52  
53 of the Global Burden of Disease (GBD) study, for 2013[1,9,10] and for 2010[11,12]. Burden data from  
54  
55 2005 were obtained directly from colleagues at the Institute for Health Metrics and Evaluation, USA.  
56  
57 As defined by the GBD study, YLDs for a disease or injury are the sum of the YLDs for each sequela  
58  
59  
60



1  
2  
3 associated with the disease or injury[10]. DALYS are the product of adding YLLs and YLDs for each  
4  
5 age–sex–country group[9].  
6

7  
8 In order to allow direct comparison of relative investment with global health metrics across disease  
9  
10 areas and between different time periods, metrics were adapted from the infectious disease  
11  
12 analyses to estimate the ‘investment per mortality/DALY/YLD observed [7]’. The metrics were  
13  
14 created using the following equation –  
15

$$\frac{\text{Total research investment up to the year before the time point} / \text{number of deaths, DALYs or YLD at} \\ \text{time point}}{\text{number of years of investment included}}$$

16  
17  
18  
19  
20  
21

22 For example, for assessment of breast cancer mortality at the 2013 time point, we took the sum of  
23  
24 breast cancer research investment 2000-2012 (£124,305,716) and divided that by number of deaths  
25  
26 reported in 2013 (471000), and divided the result by the number of years of investment included  
27  
28 (13) to get an ‘investment per mortality observed’ metric of £20.30.  
29

30  
31 These metrics were applied for research relating to 16 site-specific cancers, where there was  
32  
33 comparable data in both the ResIn and GBD studies. We defined lung cancer by aggregating  
34  
35 ‘tracheal, bronchus and lung cancer’ burden data from the GBD study. Similarly, we defined skin  
36  
37 cancer by aggregating ‘malignant skin melanoma’ and ‘non-malignant skin cancer’, and we defined  
38  
39 upper gastrointestinal (GI) cancer by aggregating ‘oesophageal’ and ‘stomach cancer’. The use of  
40  
41 total investment and the division by number of years included aimed to reduce the impact of the  
42  
43 volatility of annual research funding and the relatively short periods between time points. Ranking  
44  
45 scores of the investment metrics were developed for the 16 sites of cancer against 2013 burdens.  
46  
47 Cancers were ranked in order of relative investment against burden from high to low and assigned a  
48  
49 score (from 1 to 16). The mean ranking scores across mortality, DALYs and YLDs were used to  
50  
51 illustrate an overall relative level of investment against 2013 global disease burden.  
52  
53  
54

#### 55 56 **Patient involvement** 57 58 59 60

1  
2  
3  
4  
5  
6  
7  
8  
9  
10  
11  
12  
13  
14  
15  
16  
17  
18  
19  
20  
21  
22  
23  
24  
25  
26  
27  
28  
29  
30  
31  
32  
33  
34  
35  
36  
37  
38  
39  
40  
41  
42  
43  
44  
45  
46  
47  
48  
49  
50  
51  
52  
53  
54  
55  
56  
57  
58  
59  
60

There was no patient involvement in this study.

For peer review only

## Results

We identified 4,299 funded studies that met our inclusion criteria (Table 1). The funding for these studies represented a total research investment of almost £2.4 billion. The mean award amount for each study was £555,513 (standard deviation (SD) £1,429,510) and median was £231,559 (inter-quartile range £114,619 – 487,063). 2,416 awards (56.2% of total) were designated towards a named site-specific cancer (Table 1), equating to £1.0 billion (40.3% of total). The top five cancer sites in terms of award number were haematological, breast, colorectal, prostate, and skin; the bottom five were testicular, bone, bladder, thyroid, and cholangiocarcinoma (Table 1). The top five cancer sites in terms of total funding were haematological, breast, prostate, colorectal and ovarian; the bottom five were testicular, mesothelioma, thyroid, bladder and chlangiocarinoma. Mean funding per award varied greatly between sites with prostate cancer receiving the most (£1.47 million) and bladder cancer the least (£117,385).

The top five areas of primary research focus, by number of awards, were drug therapy, diagnostic, screening and monitoring, women's health, immunology, and pathogenesis; the bottom five areas were men's health, surgery, occupational health, global health and geriatrics (Table 2). In terms of net funding, the top five areas of research were pathogenesis, drug therapy, diagnostic, screening and monitoring, women's health, and immunology; the bottom five were surgery, psychosocial, global health, occupational health, and geriatrics.

The majority of awards were focused on pre-clinical science, accounting for 66.2% of award numbers and 62.2% of all funding (Table 3). In terms of award number, this was followed by public health, cross-disciplinary, phase I-III, and product development. This order was reflected in terms of net investment, although cross-disciplinary studies ranked ahead of public health studies. Phase I-III clinical trials received the highest mean funding per award, at £736,172 (SD £3,361,312), whilst public health research received the least, at £496,744 (SD £1,000,757).

1  
2  
3 The largest individual funder of cancer research of the studies identified was the Medical Research  
4 Council, accounting for 35.1% of all funding (Table 4). The charitable sector was responsible for  
5 39.5% of all awards (excluding CRUK) but 17.4% of funding. The European Commission was  
6 responsible for the largest mean grant per award (£1.58 million).  
7  
8  
9  
10

11  
12 We generated a compound ranking score for the 16 sites of cancer against 2013 global disease  
13 burdens, across mortality, DALYs, and YLDs (table 5). We identified the five sites that received the  
14 most funding relative to disease burden as prostate, ovarian, breast, mesothelioma and testicular  
15 cancer. The least well-funded sites relative to disease burden were cancers of the liver, thyroid, lung,  
16 upper GI, and bladder.  
17  
18  
19  
20  
21

22  
23 We were able to obtain some disaggregated data for 3,284 CRUK research grants during the period  
24 of interest but this excluded individual award data. Compared to the aggregation of all other  
25 funders, CRUK placed more of a focus on funding towards cancers of the prostate, ovary and liver –  
26 by study number these sites accounted for 6.9%, 3.4% and 2.7% of CRUK funded studies compared  
27 to 2.1%, 1.1% and 0.9% of all studies in our quantitative database, respectively. CRUK preferentially  
28 funded research investigating pathogenesis, which accounted for 51.0% of all grants awarded. In  
29 comparison, only 5.3% of all awards in our quantitative database were identified as primarily  
30 focused on pathogenesis.  
31  
32  
33  
34  
35  
36  
37  
38  
39  
40

#### 41 **Discussion**

42  
43 We identified 4,299 funded studies, with a total research investment of £2.4 billion. We performed  
44 qualitative analysis on a further 3,284 CRUK funded awards. The vast majority of all awards awarded  
45 were investigating at least one of pathogenesis, diagnosis, monitoring and screening and drug  
46 therapy. In the absence of CRUK data, the Medical Research Council and the Department of Health  
47 were the two leading funding sources. Preclinical research accounted for £1.5 billion (62.2%) of total  
48 R&D investment. Four of the five highest funded cancer sites relative to global disease burden were  
49 gender-specific – namely prostate, ovarian, breast, and testicular cancers. Cancer research with a  
50  
51  
52  
53  
54  
55  
56  
57  
58  
59  
60

1  
2  
3 clear focus on women's health accounted for 640 studies (14.9%) and £199.5 million (8.4%) of  
4  
5 investment. In comparison, 111 studies (2.6%) and £143.3 million (6.0%) of investment had a clear  
6  
7 link with men's health. This may reflect the successes of various institutions and charities that have  
8  
9 sought to increase awareness of these sex-specific cancers. Breast cancer, the most commonly  
10  
11 diagnosed cancer in the UK and the leading cause of cancer death in women, and prostate cancer,  
12  
13 the second most frequently diagnosed cancer and the sixth leading cause of cancer death among  
14  
15 men, were found to be relatively well funded[1,13].  
16  
17

18  
19 We highlight several cancer sites where there might be underinvestment, namely that of liver,  
20  
21 thyroid, lung, upper GI tract, and bladder. In our analysis cancer of the upper GI tract combines  
22  
23 oesophageal and stomach cancer. These site-specific cancers identified to be relatively underfunded  
24  
25 account for a substantial proportion of global cancer burden. Globally, these sites account for 47.9%,  
26  
27 44.3% and 20.4% of the global mortality[1], DALYs[9] and YLDs[10] of all cancers, respectively. The  
28  
29 disparity between YLDs and DALYs demonstrates the poor prognosis and high mortality of these  
30  
31 particular sites when compared against all neoplastic disease. Lung, liver, stomach and oesophagus  
32  
33 are the first, second, third and fifth, leading sites of neoplastic mortality worldwide[1].  
34  
35

36  
37 With regard to interventions research, there is heavy investment in drug-based modalities. £620.9  
38  
39 million (26.0%) was invested in novel drug therapies and £194.1 million (8.1%) was invested in the  
40  
41 emergent role of immunomodulation. In comparison, funding towards radiotherapy and surgical  
42  
43 interventions accounted for £88.2 million (3.7%) and £37.9 million (1.6%), respectively. In high-  
44  
45 income settings, around half of new cancer diagnoses will undergo a course of radiotherapy  
46  
47 treatment during their clinical management; roughly a quarter will receive two or more  
48  
49 courses[14,15]. Globally, over 80% of cancer cases will warrant surgical intervention, where it has  
50  
51 preventative, diagnostic, curative, supportive, palliative, and reconstructive roles[16].  
52  
53

54  
55 Analysis by R&D pipeline showed that research investment in the UK places a heavy emphasis on  
56  
57 pre-clinical research, but relatively little investment towards phase I-III clinical trials or product  
58  
59  
60

1  
2  
3 development, and this is line with previous research in infectious disease investment[6]. This may  
4  
5 reflect the strengths of UK institutions in preclinical science, but also could suggest a need to  
6  
7 strengthen research capacity further down the R&D chain. It would be useful to determine whether  
8  
9 investment reflects the priorities of funding agencies and whether this is comparable to research  
10  
11 investment in other countries. We noted a lack of readily available data from the pharmaceutical  
12  
13 industry and this is likely to leave a data gap in particular for sum totals of investment in clinical trials  
14  
15 of pharmaceutical products.  
16

17  
18 Our findings contribute to the development of transparent and objective methods to couple the  
19  
20 allocation of limited research funds with disease burden. Previous studies have suggested that  
21  
22 financial investment might appropriately be coupled with DALYs as a measure of burden[17–20].  
23  
24 Furthermore, previous UK research suggests that publicly funded cancer research offers substantial  
25  
26 rates of return in terms of both health and monetary benefit [21]. We have further sought to  
27  
28 incorporate mortality rates and YLDs into the consideration of cancer research investment.  
29  
30 However, defining an appropriate amount of research investment for each site specific cancer is  
31  
32 challenging since cancers of similar disease burdens may warrant different levels of investment to  
33  
34 develop cost-effective interventions. Decisions may be influenced by any of a number of factors, for  
35  
36 example due to exceptional need, as may be the case in mesothelioma, or due to public awareness  
37  
38 and third-party lobbying, as may be the case with regards to the gender-specific cancers.  
39  
40

41  
42 A variety of factors contribute towards the difficulty in tracking net cancer research investment  
43  
44 within the UK. Fragmentation of data from a large number of diverse public and private sources of  
45  
46 funding, poorly designed donor accounting structures, where available, and the paucity of  
47  
48 information from the private sector limit the evidence base to inform policy in real-time. In our  
49  
50 study, we were unable to obtain quantitative data from CRUK, the world's largest cancer research  
51  
52 charity and a leader in cancer research. They do not routinely publish or make available  
53  
54 disaggregated investment data which is, in our experience across the infection and cancer analyses,  
55  
56  
57  
58  
59  
60

1  
2  
3 unique amongst the more high-profile UK funders who are universally more transparent in their  
4  
5 award decisions. Transparency in the tracking and monitoring of cancer research financing is  
6  
7 essential to enable accountability and equity in resource allocation and to facilitate further future  
8  
9 research in this area.  
10

11  
12 In this study we systematically analyse UK investment in cancer research and identify areas of  
13  
14 relative neglect. Although the competitive application process used by most funders to allocate  
15  
16 research grants ensure a portfolio of high quality, the absence of explicit resource allocation criteria  
17  
18 could contribute towards inequalities in R&D by disease burden. Funding agencies will have  
19  
20 particular areas of focus, and UK funders may have considered the focus of international agencies in  
21  
22 their own research strategies. As a result, international data is essential to complete the mapping of  
23  
24 cancer research investment. Nevertheless, our findings will inform funders and contribute towards  
25  
26 policy discussions to prevent inequity in the allocation of limited resources.  
27  
28

29  
30 By demonstrating the relationship between disease burden and research funding, we enable the  
31  
32 identification of potential investment gaps. However, it is not possible to equate gaps in funding  
33  
34 with areas of neglect without consideration of other influences such as the feasibility of research,  
35  
36 costs of technologies, infrastructure and skill requirements, political and social considerations, and  
37  
38 the accuracy of disease burden estimates.  
39

40  
41 There are several potential limitations to our study. We are dependent on the accuracy of original  
42  
43 investment data as sourced from the funding bodies. Although checks were made on any obvious  
44  
45 discrepancies or errors, interpretation of these original data may contain errors. We made no  
46  
47 attempt to investigate the contribution of any indirect or estate costs. Currency conversions were  
48  
49 averaged across each financial year and any intra-year fluctuations may not have been captured.  
50  
51 Unless clearly documented, we were unable to assess how funding was distributed from lead  
52  
53 institutions to collaborative partners. We considered individual awards, rather than number of  
54  
55 studies.  
56  
57  
58  
59  
60

1  
2  
3 Furthermore, assignment of disease categories and allocation of studies according to these  
4  
5 categories is subjective, and there might be disagreements regarding certain inclusion criteria.  
6  
7

8 We could not openly access data of private sector research funding, nor were we able to obtain  
9  
10 disaggregated award data from CRUK. Whilst our analysis did demonstrate that CRUK funding (with  
11  
12 some exceptions) broadly reflected the findings of our quantitative database, it is likely that  
13  
14 substantial awards towards particular areas of research could skew results; for example, the CRUK  
15  
16 accounts for 2014/15 suggest £394 million was invested into research or research-related activity,  
17  
18 and we hypothesise that much of that would have met our inclusion criteria for this analysis[22].  
19

20  
21 Disease burden measures are typically an estimate and are subject to the potential introduction of  
22  
23 bias from missing or unobtainable data as well as from differences in classification and diagnosis.  
24  
25

26 Our report presents the latest investment data on cancer research awarded to UK institution between  
27  
28 2000 and 2013. Cancers of the liver, thyroid, lung, upper GI tract, and bladder as well as research  
29  
30 towards radiotherapy and surgical techniques in particular may warrant increased rates of  
31  
32 investment. We will make the entire database and associated figures available online  
33  
34 ([www.researchinvestment.org](http://www.researchinvestment.org)) to assist policy makers, funding organisations, and researchers in the  
35  
36 identification of investment gaps. We further encourage funding organisations to make their  
37  
38 investment portfolios openly accessible to facilitate future research.  
39

40  
41 We hope that open funding data in this area can contribute to redressing the misalignments in  
42  
43 investments for cancer research. Cancer research can improve the clinical course of disease and  
44  
45 offer tangible improvements in health outcomes[21]. Both policy makers and the scientific  
46  
47 community need to ensure that limited resources are allocated appropriately to most effectively  
48  
49 alleviate the morbidity and mortality associated with cancer.  
50  
51  
52  
53  
54  
55  
56  
57  
58  
59  
60



**Contributions**

MM and MGH are the guarantors of this study. MM, MGH, JRF and RA conceived and designed the study. MGH, CDZ, BJG and MAE-H obtained the data. MM and MGH conducted data formatting and statistical analysis. All authors helped interpret the findings. MM, MGH and CDZ wrote the first draft of the manuscript with input from RR, JRF and RA; all authors provided input to subsequent drafts. All authors had full access to all of the data in the study and take responsibility for its integrity and the accuracy of data analysis.

**Transparency declaration**

MM affirms that the manuscript is an honest, accurate, and transparent account of the study being reported; that no important aspects of the study have been omitted; and that any discrepancies from the study as planned (and, if relevant, registered) have been explained.

**Funding**

No funding was received for this study

**Competing interests**

All authors declare no support from any organisation for the submitted work; no financial relationships with any organisations that might have an interest in the submitted work in the previous three years; no other relationships or activities that could appear to have influenced the submitted work.

**Ethical approval**

Not required

**Data sharing**

1  
2  
3  
4  
5  
6  
7  
8  
9  
10  
11  
12  
13  
14  
15  
16  
17  
18  
19  
20  
21  
22  
23  
24  
25  
26  
27  
28  
29  
30  
31  
32  
33  
34  
35  
36  
37  
38  
39  
40  
41  
42  
43  
44  
45  
46  
47  
48  
49  
50  
51  
52  
53  
54  
55  
56  
57  
58  
59  
60

All data used is publicly available. Entire database and associated figures are permanently available with open access online ([www.researchinvestment.org](http://www.researchinvestment.org)) to assist policy makers, funding organisations, and researchers.

For peer review only

## References

- 1 Naghavi M, Wang H, Lozano R, *et al*. Global, regional, and national age-sex specific all-cause and cause-specific mortality for 240 causes of death, 1990-2013: A systematic analysis for the Global Burden of Disease Study 2013. *Lancet* 2015;**385**:117–71.
- 2 Jemal A, Bray F, Center MM, *et al*. Global Cancer Statistics: 2011. *CA Cancer J Clin* 2011;**61**:69–90.<http://www.ncbi.nlm.nih.gov/pubmed/21296855>
- 3 Torre LA, Bray F, Siegel RL, *et al*. Global Cancer Statistics, 2012. *CA a cancer J Clin* 2015;**65**:87–108.<http://onlinelibrary.wiley.com/doi/10.3322/caac.21262/abstract>
- 4 Luengo-Fernandez R, Leal J, Gray A, *et al*. Economic burden of cancer across the European Union: a population-based cost analysis. *Lancet Oncol* 2013;**14**:1165–74.<http://ovidsp.ovid.com/ovidweb.cgi?T=JS&CSC=Y&NEWS=N&PAGE=fulltext&D=medl&AN=24131614>
- 5 Yabroff KR, Lund J, Kepka D, *et al*. Economic Burden of Cancer in the United States: Estimates, Projections, and Future Research. *Cancer Epidemiol Biomarkers Prev* 2011;**20**:2006–14.<Go to ISI>://WOS:000295717900003
- 6 Head MG, Fitchett JR, Cooke MK, *et al*. UK investments in global infectious disease research 1997-2010: A case study. *Lancet Infect Dis* 2013;**13**:55–64.
- 7 Head MG, Fitchett JR, Nageshwaran V, *et al*. Research Investments in Global Health: A Systematic Analysis of UK Infectious Disease Research Funding and Global Health Metrics, 1997–2013. *EBioMedicine* 2016;**3**:180–90.<http://dx.doi.org/10.1016/j.ebiom.2015.12.016>
- 8 Head MG, Fitchett JR, Derrick G, *et al*. Comparing research investment to United Kingdom institutions and published outputs for tuberculosis, HIV and malaria: a systematic analysis across 1997-2013. *Health Res Policy Syst* 2015;**13**:63.<http://www.health-policy-systems.com/content/13/1/63>
- 9 Murray CJL, Barber RM, Foreman KJ, *et al*. Global, regional, and national disability-adjusted life years (DALYs) for 306 diseases and injuries and healthy life expectancy (HALE) for 188 countries, 1990–2013: quantifying the epidemiological transition. *Lancet* 2015;**386**:2145–91.
- 10 Vos T, Barber RM, Bell B, *et al*. Global, regional, and national incidence, prevalence, and years lived with disability for 301 acute and chronic diseases and injuries in 188 countries, 1990–2013: a systematic analysis for the Global Burden of Disease Study 2013. *Lancet* 2015;**386**:743–800.
- 11 Murray CJ, Vos T, Lozano R, *et al*. Disability-adjusted life years (DALYs) for 291 diseases and injuries in 21 regions, 1990-2010: a systematic analysis for the Global Burden of Disease Study 2010. *Lancet* 2012;**380**:2197–223.<http://www.ncbi.nlm.nih.gov/pubmed/23245608>
- 12 Lozano R, Naghavi M, Foreman K, *et al*. Global and regional mortality from 235 causes of death for 20 age groups in 1990 and 2010: A systematic analysis for the Global Burden of Disease Study 2010. *Lancet* 2012;**380**:2095–128.

- 1  
2  
3 13 Jemal A, Bray F, Center MM, Ferlay J, Ward E FD. Global cancer statistics. *Cancer J Clin*  
4 2011;**61**:69–90.  
5  
6 14 Barton MB, Frommer M, Shafiq J. Role of radiotherapy in cancer control in low-income and  
7 middle-income countries. *Lancet Oncol* 2006;**7**:584–95.[http://ac.els-](http://ac.els-cdn.com/S1470204506707598/1-s2.0-S1470204506707598-main.pdf?_tid=41dac6b8-7fa0-11e3-a45c-0000aab0f27&acdnat=1389981382_3394f8c1d926c07e5acaad4254556251)  
8 [cdn.com/S1470204506707598/1-s2.0-S1470204506707598-main.pdf?\\_tid=41dac6b8-7fa0-](http://ac.els-cdn.com/S1470204506707598/1-s2.0-S1470204506707598-main.pdf?_tid=41dac6b8-7fa0-11e3-a45c-0000aab0f27&acdnat=1389981382_3394f8c1d926c07e5acaad4254556251)  
9 [11e3-a45c-0000aab0f27&acdnat=1389981382\\_3394f8c1d926c07e5acaad4254556251](http://ac.els-cdn.com/S1470204506707598/1-s2.0-S1470204506707598-main.pdf?_tid=41dac6b8-7fa0-11e3-a45c-0000aab0f27&acdnat=1389981382_3394f8c1d926c07e5acaad4254556251)  
10  
11  
12 15 Barton MB, Jacob S, Shafiq J, *et al.* Estimating the demand for radiotherapy from the  
13 evidence: a review of changes from 2003 to 2012. *Radiother Oncol* 2014;**112**:140–4.  
14  
15 16 Sullivan R, Alatiser OI, Anderson BO, *et al.* Global cancer surgery: Delivering safe, affordable,  
16 and timely cancer surgery. *Lancet Oncol*. 2015;**16**:1193–224.  
17  
18 17 Gross CP, Anderson GF, Powe NR. The relation between funding by the National Institutes of  
19 Health and the burden of disease. *N Engl J Med* 1999;**340**:1881–7.  
20  
21 18 Lopez FC, Martin EA, Maleras RG, *et al.* Relationship between Research Funding in the  
22 Spanish National Health System and the Burden of Disease. *Rev Esp Salud Publica*  
23 2009;**83**:137–51.<Go to ISI>://WOS:000266635200011  
24  
25  
26 19 Mitchell RJ, McClure RJ, Olivier J, *et al.* Rational allocation of Australia’s research dollars: does  
27 the distribution of NHMRC funding by National Health Priority Area reflect actual disease  
28 burden? *Med J Aust* 2009;**191**:648.  
29  
30 20 Lamarre-Cliche M, Castilloux AM, LeLorier J. Association between the burden of disease and  
31 research funding by the Medical Research Council of Canada and the National Institutes of  
32 Health. A cross-sectional study. *Clin Invest Med* 2001;**24**:83–  
33 9.<http://www.ncbi.nlm.nih.gov/pubmed/11368150>  
34  
35  
36 21 Glover M, Buxton M, Guthrie S, *et al.* Estimating the returns to UK publicly funded cancer-  
37 related research in terms of the net value of improved health outcomes. *BMC Med*  
38 2014;**12**:1.  
39  
40 22 CRUK. Annual report and accounts 2014/15. 2015.  
41 [http://www.cancerresearchuk.org/sites/default/files/annual\\_report\\_and\\_accounts\\_2014-](http://www.cancerresearchuk.org/sites/default/files/annual_report_and_accounts_2014-15.pdf)  
42 [15.pdf](http://www.cancerresearchuk.org/sites/default/files/annual_report_and_accounts_2014-15.pdf)  
43  
44  
45  
46  
47  
48  
49  
50  
51  
52  
53  
54  
55  
56  
57  
58  
59  
60

## Table Legends

**Table 1:** Cancer research investment awards and funding by site. All investment reported in 2013 UK pounds.

**Table 2:** Cancer research investment awards and funding by cross-cutting theme. All investment reported in 2013 UK pounds.

**Table 3:** Cancer research investment awards and funding by type of science. All investment reported in 2013 UK pounds.

**Table 4:** Cancer research investment awards and funding by funding agency (excluding CRUK). All investment reported in 2013 UK pounds.

**Table 5:** Compound ranking score for cancer research investment against 2013 global disease burdens, across mortality, DALYs, and YLDs, by cancer site.

| Site of cancer     | All funders where investment data was available |                     |                       |                     |                         |                               | Cancer Research UK |                                            |
|--------------------|-------------------------------------------------|---------------------|-----------------------|---------------------|-------------------------|-------------------------------|--------------------|--------------------------------------------|
|                    | Number of awards                                | Percentage of total | Sum investment (£)    | Percentage of total | Mean award, £ (SD)      | Median award, £ (IQR)         | Number of awards   | Percentage of all oncology research awards |
| Breast             | 571                                             | 13.3%               | £137,960,107          | 5.8%                | 241611 (414584)         | 135752 (25000-216673)         | 273                | 8.3%                                       |
| Haematological     | 1158                                            | 26.9%               | £381,008,394          | 16.0%               | 329022 (476943)         | 186813 (120437-272324)        | 225                | 6.9%                                       |
| Colorectal         | 147                                             | 3.4%                | £77,279,857           | 3.2%                | 525713 (674881)         | 251800 (102078-819866)        | 205                | 6.2%                                       |
| Prostate           | 92                                              | 2.1%                | £135,290,779          | 5.7%                | 1470552 (6156372)       | 333757 (155227-721037)        | 123                | 3.7%                                       |
| Ovarian            | 48                                              | 1.1%                | £44,709,938           | 1.9%                | 931457 (3380145)        | 226764 (131990-627401)        | 112                | 3.4%                                       |
| Lung               | 82                                              | 1.9%                | £24,263,280           | 1.0%                | 295893 (556278)         | 146123 (66701-242934)         | 89                 | 2.7%                                       |
| Skin               | 87                                              | 2.0%                | £22,179,011           | 0.9%                | 254931 (453726)         | 85406 (69629-248603)          | 84                 | 2.6%                                       |
| Brain              | 22                                              | 0.5%                | £9,994,255            | 0.4%                | 454284 (498933)         | 401046 (196928-528008)        | 83                 | 2.5%                                       |
| Upper GI and       | 18                                              | 0.4%                | £19,094,230           | 0.8%                | 1060791 (1448010)       | 788850 (80964-1296962)        | 80                 | 2.4%                                       |
| Head and neck      | 20                                              | 0.5%                | £18,250,632           | 0.8%                | 912531 (1003091)        | 389751 (167358-1602465)       | 68                 | 2.1%                                       |
| Renal              | 19                                              | 0.4%                | £13,885,496           | 0.6%                | 730815 (678732)         | 479197 (244075-1252574)       | 48                 | 1.5%                                       |
| Bladder            | 10                                              | 0.2%                | £1,173,856            | 0.0%                | 117385 (106902)         | 94520 (29264- 173855)         | 48                 | 1.5%                                       |
| Cervical           | 26                                              | 0.6%                | £14,328,402           | 0.6%                | 551092 (877250)         | 210179 (88934-368402)         | 43                 | 1.3%                                       |
| Pancreatic         | 16                                              | 0.4%                | £9,453,577            | 0.4%                | 590848 (519850)         | 276237 (191804-1033948)       | 40                 | 1.2%                                       |
| Bone               | 13                                              | 0.3%                | £17,242,183           | 0.7%                | 1326322 (1604685)       | 685853 (243559-1999907)       | 29                 | 0.9%                                       |
| Liver              | 37                                              | 0.9%                | £25,037,541           | 1.0%                | 676690 (847151)         | 319082 (177974-776480)        | 20                 | 0.6%                                       |
| Mesothelioma       | 30                                              | 0.7%                | £4,476,088            | 0.2%                | 149202 (101201)         | 137103 (95895-205500)         | 11                 | 0.3%                                       |
| Cholangiocarcinoma | 2                                               | 0.0%                | £582,405              | 0.0%                | n/a                     | n/a                           | 11                 | 0.3%                                       |
| Testicular         | 14                                              | 0.3%                | £5,949,990            | 0.2%                | 424999 (507277)         | 242175 (102938-411010)        | 11                 | 0.3%                                       |
| Thyroid            | 4                                               | 0.1%                | £1,375,881            | 0.1%                | n/a                     | n/a                           | 7                  | 0.2%                                       |
| <b>Total</b>       | <b>4299</b>                                     |                     | <b>£2,388,152,318</b> |                     | <b>555513 (1429510)</b> | <b>231559 (114619-487063)</b> | <b>3284</b>        |                                            |

| Cross-cutting theme                  | All funders where investment data was available |                     |                       |                     |                         |                               | Cancer Research UK |                                            |
|--------------------------------------|-------------------------------------------------|---------------------|-----------------------|---------------------|-------------------------|-------------------------------|--------------------|--------------------------------------------|
|                                      | Number of awards                                | Percentage of total | Sum investment (£)    | Percentage of total | Mean award, £ (SD)      | Median award, £ (IQR)         | Number of awards   | Percentage of all oncology research awards |
| Pathogenesis (mechanism)             | 227                                             | 5.3%                | £1,374,387,838        | 57.6%               | 543881 (955710)         | 248573 (135752-506232)        | 1674               | 51.0%                                      |
| Drug Therapy                         | 1104                                            | 25.7%               | £620,961,060          | 26.0%               | 562464 (1910050)        | 202342 (105622-436559)        | 935                | 28.5%                                      |
| Diagnostic, Screening and Monitoring | 681                                             | 15.8%               | £359,618,823          | 15.1%               | 528074 (1155156)        | 205728 (102672-513836)        | 404                | 12.3%                                      |
| Women's Health                       | 640                                             | 14.9%               | £199,534,693          | 8.4%                | 311773 (1041520)        | 153845 (56515-227202)         | 287                | 8.7%                                       |
| Immunology (inc. biologics)          | 451                                             | 10.5%               | £194,086,617          | 8.1%                | 430347 (760955)         | 240052 (125669-466250)        | 212                | 6.5%                                       |
| Radiotherapy                         | 112                                             | 2.6%                | £88,262,353           | 3.7%                | 788056 (2413445)        | 243333 (106175-439419)        | 209                | 6.4%                                       |
| Psychosocial                         | 117                                             | 2.7%                | £23,445,835           | 1.0%                | 200391 (352410)         | 87463 (27317-239059)          | 122                | 3.7%                                       |
| Men's Health                         | 111                                             | 2.6%                | £143,392,908          | 6.0%                | 1291828 (5617919)       | 285203 (126037-700353)        | 120                | 3.7%                                       |
| Paediatrics                          | 175                                             | 4.1%                | £62,641,938           | 2.6%                | 357953 (547484)         | 183099 (89522-322261)         | 118                | 3.6%                                       |
| Surgery                              | 72                                              | 1.7%                | £37,900,334           | 1.6%                | 526393 (684908)         | 235413 (97890-761651)         | 95                 | 2.9%                                       |
| Infection-associated                 | 129                                             | 3.0%                | £56,819,379           | 2.4%                | 440460 (798013)         | 231836 (134693-439378)        | 48                 | 1.5%                                       |
| Global Health                        | 12                                              | 0.3%                | £6,434,960            | 0.3%                | 536246 (1089118)        | 129738 (77519-459274)         | 12                 | 0.4%                                       |
| Geriatrics                           | 7                                               | 0.2%                | £1,616,394            | 0.1%                | 230913 (254925)         | 121623 (76421-262167)         | 8                  | 0.2%                                       |
| Occupational Health                  | 18                                              | 0.4%                | £2,576,841            | 0.1%                | 143157 (116928)         | 137103 (33857-199998)         | 8                  | 0.2%                                       |
| <b>Total</b>                         | <b>4299</b>                                     |                     | <b>£2,388,152,318</b> |                     | <b>555513 (1429510)</b> | <b>231559 (114619-487063)</b> | <b>3284</b>        |                                            |

| Type of science     | All funders where investment data was available |                     |                       |                     |                         |                               | Cancer Research UK |                                            |
|---------------------|-------------------------------------------------|---------------------|-----------------------|---------------------|-------------------------|-------------------------------|--------------------|--------------------------------------------|
|                     | Number of awards                                | Percentage of total | Sum investment (£)    | Percentage of total | Mean award, £ (SD)      | Median award, £ (IQR)         | Number of awards   | Percentage of all oncology research awards |
| Pre-clinical        | 2845                                            | 66.2%               | £1,485,997,379        | 62.2%               | 522318 (1006600)        | 240974 (132188-490872)        | 1809               | 55.1%                                      |
| Phase I-III         | 303                                             | 7.0%                | £223,060,276          | 9.3%                | 736172 (3361312)        | 178535 (70934-502399)         | 647                | 19.7%                                      |
| Product development | 172                                             | 4.0%                | £104,214,364          | 4.4%                | 605897 (2213394)        | 193051 (75270-360813)         | 52                 | 1.6%                                       |
| Cross-disciplinary  | 441                                             | 10.3%               | £315,145,351          | 13.2%               | 714615 (1586882)        | 238523 (126589-703764)        | 328                | 10.0%                                      |
| Public health       | 512                                             | 11.9%               | £254,333,282          | 10.6%               | 496744 (1000757)        | 209364 (82870-383623)         | 443                | 13.5%                                      |
| Unable to specify   | 26                                              | 0.6%                | £5,401,666            | 0.2%                | n/a                     | n/a                           | 5                  | 0.2%                                       |
| <b>Total</b>        | <b>4299</b>                                     |                     | <b>£2,388,152,318</b> |                     | <b>555513 (1429510)</b> | <b>231559 (114619-487063)</b> | <b>3284</b>        |                                            |



| All funders where investment data was available |                  |                     |                       |                     |                         |                               |
|-------------------------------------------------|------------------|---------------------|-----------------------|---------------------|-------------------------|-------------------------------|
| Funder                                          | Number of awards | Percentage of total | Sum investment (£)    | Percentage of total | Mean award, £ (SD)      | Median award, £ (IQR)         |
| MRC                                             | 768              | 17.9%               | £837,649,875          | 35.1%               | 1090690 (1770533)       | 504606 (305375-1153374)       |
| Charity (excluding Wellcome and CRUK)           | 1,699            | 39.5%               | £415,189,093          | 17.4%               | 244372 (391813)         | 151912 (81000-223244)         |
| Department of Health                            | 586              | 13.6%               | £413,421,823          | 17.3%               | 705498 (2675223)        | 232173 (102391-471236)        |
| BBSRC                                           | 511              | 11.9%               | £223,651,002          | 9.4%                | 437673 (388793)         | 373356 (267848-501592)        |
| EPSRC                                           | 356              | 8.3%                | £201,861,623          | 8.5%                | 567027 (972696)         | 306906 (144056-604016)        |
| Wellcome                                        | 193              | 4.5%                | £140,425,805          | 5.9%                | 727594 (1679370)        | 226761 (164547-427455)        |
| European Commission (inc ERC)                   | 50               | 1.2%                | £78,757,447           | 3.3%                | 1575149 (731858)        | 1409678 (1252574-1830017)     |
| Other                                           | 136              | 3.2%                | £77,195,650           | 3.2%                | 567615 (1901202)        | 129944 (69309-263613)         |
| <b>Total</b>                                    | <b>4299</b>      |                     | <b>£2,388,152,318</b> |                     | <b>555513 (1429510)</b> | <b>231559 (114619-487063)</b> |

1  
2  
3  
4  
5  
6  
7  
8  
9  
10  
11  
12  
13  
14  
15  
16  
17  
18  
19  
20  
21  
22  
23  
24  
25  
26  
27  
28  
29  
30  
31  
32  
33  
34  
35  
36  
37  
38  
39  
40  
41  
42  
43  
44  
45  
46  
47  
48  
49

|                | <b>Research investment (UK pound) by burden observed, 2013</b> |                  |                                    |                                       |
|----------------|----------------------------------------------------------------|------------------|------------------------------------|---------------------------------------|
| <b>Disease</b> | <b>Mean ranking across all burden metrics</b>                  | <b>Mortality</b> | <b>Years lived with disability</b> | <b>Disability-adjusted life years</b> |
| Prostate       | <b>2.7</b>                                                     | 2                | 4                                  | 2                                     |
| Ovarian        | <b>3.0</b>                                                     | 4                | 2                                  | 3                                     |
| Mesothelioma   | <b>4.0</b>                                                     | 6                | 1                                  | 5                                     |
| Breast         | <b>4.0</b>                                                     | 3                | 5                                  | 4                                     |
| Testicular     | <b>4.7</b>                                                     | 1                | 3                                  | 10                                    |
| Skin           | <b>5.0</b>                                                     | 5                | 9                                  | 1                                     |
| Colorectal     | <b>6.7</b>                                                     | 7                | 7                                  | 6                                     |
| Renal          | <b>8.3</b>                                                     | 8                | 10                                 | 7                                     |
| Cervical       | <b>9.7</b>                                                     | 9                | 12                                 | 8                                     |
| Pancreatic     | <b>10.0</b>                                                    | 12               | 6                                  | 12                                    |
| Brain          | <b>11.0</b>                                                    | 11               | 11                                 | 11                                    |
| Thyroid        | <b>11.3</b>                                                    | 10               | 15                                 | 9                                     |
| Liver          | <b>11.3</b>                                                    | 13               | 8                                  | 13                                    |
| Lung           | <b>13.7</b>                                                    | 14               | 13                                 | 14                                    |
| Upper GI       | <b>14.7</b>                                                    | 15               | 14                                 | 15                                    |
| Bladder        | <b>16.0</b>                                                    | 16               | 16                                 | 16                                    |

# BMJ Open

## Investments in cancer research awarded to UK institutions and the global burden of cancer 2000-2013: a systematic analysis

|                                 |                                                                                                                                                                                                                                                                                                                                       |
|---------------------------------|---------------------------------------------------------------------------------------------------------------------------------------------------------------------------------------------------------------------------------------------------------------------------------------------------------------------------------------|
| Journal:                        | <i>BMJ Open</i>                                                                                                                                                                                                                                                                                                                       |
| Manuscript ID                   | bmjopen-2016-013936.R1                                                                                                                                                                                                                                                                                                                |
| Article Type:                   | Research                                                                                                                                                                                                                                                                                                                              |
| Date Submitted by the Author:   | 28-Oct-2016                                                                                                                                                                                                                                                                                                                           |
| Complete List of Authors:       | Maruthappu, Mahiben<br>Head, Michael; University College London, Infection & Population Health<br>Zhou, Charlie; University of Oxford,<br>Gilbert, Barnabas<br>El-Harasis, Majd<br>Raine, Rosalind<br>Fitchett, Joseph; King's College London, School of Medicine<br>Atun, Rifat; Harvard University, Harvard School of Public Health |
| <b>Primary Subject Heading</b>: | Health policy                                                                                                                                                                                                                                                                                                                         |
| Secondary Subject Heading:      | Global health, Health economics, Oncology, Public health                                                                                                                                                                                                                                                                              |
| Keywords:                       | ONCOLOGY, research investment, global burden of disease, global health, funding, research and development                                                                                                                                                                                                                             |
|                                 |                                                                                                                                                                                                                                                                                                                                       |

SCHOLARONE™  
Manuscripts

Only

1  
2  
3 **Investments in cancer research awarded to UK institutions and the global burden of cancer 2000-**  
4 **2013: a systematic analysis**

5  
6 Mahiben Maruthappu<sup>a,\*</sup> Michael G Head<sup>b,\*</sup> Charlie Da Zhou<sup>c</sup>, Barnabas J Gilbert<sup>d</sup>, Majd A El-Harasis<sup>e</sup>,  
7 Rosalind Raine<sup>f</sup>, Joseph R Fitchett<sup>g</sup>, Rifat Atun<sup>g</sup>  
8

9 a Public Health Specialty Registrar, Epidemiology and Public Health, University College London, 1-19  
10 Torrington Place, London, WC1E 6BT, UK  
11

12 b Senior Research Fellow, Global Health Research Institute, Institute for Life Sciences, Faculty of  
13 Medicine, University of Southampton, Southampton, SO17 1BJ, UK  
14

15 c Doctor, Medical Sciences Division, University of Oxford, Oxford OX1 2JD, UK  
16

17 d Doctor, Harvard University, Cambridge, MA 02138, USA.  
18

19 e Doctor, Faculty of Medicine, Imperial College London, London, SW7 2AZ, UK.  
20

21 f Professor, Department of Applied Health Research, UCL, London, WC1E 7HB  
22

23 g Professor, Harvard T. H. Chan School of Public Health, Harvard University, Boston, MA 02115, USA  
24

25  
26 \* Authors Maruthappu and Head to be recognised as joint first-author  
27  
28

29 **Corresponding author**

30 Charlie Zhou  
31

32 [chazhou@gmail.com](mailto:chazhou@gmail.com)  
33

34 New College, Holywell Street, Oxford, OX1 3BN, UK  
35  
36

37 **Short title**

38 UK investments in oncology research  
39

40 **Word count**

41 4509  
42

43 **Number of references**

44 22  
45  
46

47 **Keywords**

48 cancer; oncology; research investment; global burden of disease; global health; funding; research  
49 and development  
50  
51  
52  
53  
54  
55  
56  
57  
58  
59  
60

## ABSTRACT

### Objectives

We sought to systematically categorise cancer research investment awarded to UK institutions in the period 2000-2013 and to estimate research investment relative to disease burden as measured by mortality, disability-adjusted life years (DALYs), and years lived with disability (YLDs).

### Design

Systematic analysis of all open access data.

### Setting and participants

Public and philanthropic funding to all UK cancer research institutions, 2000-2013

### Main outcome measures

Number and financial value of cancer research investment reported in 2013 UK pounds. Mortality, DALYs and YLDs data was acquired from the Global Burden of Diseases Study. A compound metric was adapted to estimate research investment relative to disease burden as measured by mortality, DALYs, and YLDs.

### Results

We identified 4,299 funded studies with a total research investment of UK£2.4 billion. The highest funding by sites were haematological, breast, prostate, colorectal, and ovarian cancers. Relative to disease burden as determined by a compound metric combining mortality, DALYs and YLDs, gender-specific cancers were found to be highest funded - the five sites that received the most funding were prostate, ovarian, breast, mesothelioma, and testicular cancer; the least well-funded sites were liver, thyroid, lung, upper GI and bladder. Pre-clinical science accounted for 66.2% of award numbers and 62.2% of all funding. The top five areas of primary research focus by funding were pathogenesis, drug therapy, diagnostic, screening and monitoring, women's health, and immunology. The largest

1  
2  
3 individual funder was the Medical Research Council. In combination, the five lowest funded site  
4  
5 specific cancers relative to disease burden account for 47.9%, 44.3% and 20.4% of worldwide cancer  
6  
7 mortality, DALYs and YLDs.  
8  
9

## 10 **Conclusions**

11  
12 Current and projected global cancer disease burden may be a consideration in the allocation of  
13  
14 limited research funding. Funding agencies and industry need to openly document their research  
15  
16 investment to enable the development of transparent and objective methods to allocate funding.  
17  
18  
19

## 20 **Strengths and limitations of this study:**

- 21  
22
- 23 • We systematically analyse UK investment in cancer research and describe trends by cancer  
24 site and type of science along the research pipeline.
  - 25 • We consider cancer research investments alongside the global burden of disease to provide  
26 pragmatic commentary about areas of UK research strength and relative neglect to inform  
27 funder strategy and contribute towards policy discussions.
  - 28 • Our study is dependent on the accuracy of original investment data from the funding bodies
  - 29 • We could not openly access data of private sector research funding, nor were we able to  
30 obtain disaggregated award data from CRUK.
  - 31 • Disease burden measures are typically an estimate and are subject to the potential  
32 introduction of bias; other variable influence funding decisions beyond the burden of  
33 disease.  
34  
35  
36  
37  
38  
39  
40  
41  
42  
43  
44  
45  
46  
47  
48  
49  
50  
51  
52  
53  
54  
55  
56  
57  
58  
59  
60

## Introduction

Cancers account for a high burden of morbidity and mortality worldwide. The Global Burden of Disease (GBD) Study estimates that cancer of all types resulted in 8,235,700 deaths in 2013[1]. Being predominantly a disease of older age, prevalence of cancers has historically fallen among high-income countries. However as low-income countries experience economic maturation, we are seeing an expanded distribution of this disease burden. Further deaths from cancer are projected due to global population growth and ageing[2,3]. Between 1990 and 2013, the proportion of all deaths that was attributable to cancer rose from 11.9% to 15.0%, largely among low- and middle-income countries and site-specific cancers accounted for 9 of the 50 leading causes of death, worldwide[1].

The socioeconomic impact of cancer, both in terms of direct costs involved in medical management as well as indirect costs resulting from productivity loss, on patients and caregivers are substantial. Direct health-related costs of cancer have been estimated to incur €51.0 billion within in the European Union[4] and \$124.5 billion in the United States[5]. Indirect costs are estimated to account for additional losses of €75.2 billion and \$115.8 billion, respectively. Economic evaluation of the impact of cancer outside of these two geographical regions has been lacking.

Investment in research and development (R&D) for cancers produces global public benefits that have a positive effect both locally and worldwide, irrespective of the site of the work or the location of the institution receiving an award, bringing substantial health, social, and economic benefit.

There are several national and international funding bodies that make cancer research investments along the R&D pipeline, from population health research, pre-clinical studies through to clinical trials and applied research. The UK remains one of the world's leading investors and producers of global biomedical and health research. Previous analyses by the Research Investments in Global Health study (ResIn, [www.researchinvestments.org](http://www.researchinvestments.org)) has systematically analysed public and philanthropic

1  
2  
3 awards totalling £3.7 billion to UK institutions for infectious disease from 1997 to 2013, and  
4  
5 evaluated funding against global disease burden[6,7] and publications and citations as a marker of  
6  
7 research output[8]. Tracking investments in R&D provides information and evidence to inform  
8  
9 funding decisions and priority setting. Here, we present a systematic analysis of cancer-related  
10  
11 research awarded by public and philanthropic funders to UK institutions from 2000 to 2013,  
12  
13 categorise the data against a range of cancer-specific and cross-cutting disease areas, and assess the  
14  
15 award data against global measures of mortality, disability-adjusted life years (DALYs), and years  
16  
17 lived with disability (YLD) across three time points.  
18  
19

## 20 21 **Methods**

22  
23 Our methods build on those developed for the infectious disease research investment analysis,  
24  
25 which are described in detail elsewhere[6,7] and adapted in subsequent peer-reviewed publications  
26  
27 ([www.researchinvestments.org/publications](http://www.researchinvestments.org/publications)).  
28  
29

30  
31 We systematically examined funding awards from a number of public and philanthropic funding  
32  
33 bodies (including the Medical Research Council, Department of Health, Biotechnology and Biological  
34  
35 Sciences Research Council, Engineering and Physical Science Research Council, Wellcome Trust,  
36  
37 European Commission, as well as 9 members of the Association of Medical Research Charities)  
38  
39 between 2000 and 2013. Information was obtained by downloading openly-accessible information  
40  
41 on the funder website, contacting the funder to request the information, or searching existing  
42  
43 funding databases. For each award, the title and abstract, where available, were individually  
44  
45 screened for relevance to cancer research. We excluded awards that were i) not obviously or  
46  
47 immediately relevant to oncology; ii) led by a non-UK institution; iii) not considered to be for R&D  
48  
49 activity. Studies that were completed without funding were also excluded. Private sector data were  
50  
51 not available to evaluate at the same level of detail as public and philanthropic research award data,  
52  
53 and were therefore excluded from this analysis. Cancer Research UK (CRUK) would not provide their  
54  
55 funding data at individual award level, as in accordance with their organisational policy, and so could  
56  
57  
58  
59  
60



1  
2  
3 not be included in the main analysis. There is some description of individual CRUK awards without  
4 grant amounts available at <https://europepmc.org/>. We report total number of studies in this  
5 analysis.  
6  
7  
8  
9

10 Where awards were described in currencies other than UK pounds, these were converted to UK  
11 pounds using the mean exchange rate in the year of the award. All included awards were adjusted  
12 for inflation and reported in 2013 UK pounds.  
13  
14  
15

16 Each study in the dataset was reviewed by one author (either CDZ, GJG, MAE-H, MGH) and assigned  
17 to as many of 14 cross-cutting categories as appropriate. The 14 association categories were  
18 paediatric, geriatric, infection-associated, women's health, men's health, occupational health,  
19 pathogenesis, diagnostic/screening/monitoring, drug therapy, radiotherapy, surgery, immunology,  
20 psychosocial and global health. Awards were defined as global health if they were considered to  
21 pursue a clear non-UK focus (e.g. 'thyroid cancer in Kenya'). The other category was only used when  
22 none of the aforementioned categories were deemed to be appropriate. Studies were also allocated  
23 to one of five categories along the R&D pipeline: pre-clinical; phase I, II, or III clinical trials; product  
24 development (including phase IV activity); public health; and cross-disciplinary research. The cross-  
25 disciplinary category was defined as an award containing significant components across two distinct  
26 areas along the R&D pipeline (such as pre-clinical research leading directly into a phase I trial).  
27  
28  
29  
30  
31  
32  
33  
34  
35  
36  
37  
38  
39

40 Provisional datasets were circulated to all authors for review and comment with checks by second  
41 authors on sections of the data and any disagreements settled by consensus. Final datasets were  
42 then again circulated for further review by all authors. Microsoft Excel 2010 and 2013 and Stata  
43 (V13) software were used for data analysis.  
44  
45  
46  
47  
48  
49

50 Global data on mortality, disability-adjusted life years (DALYs) and years lived with disability (YLDs)  
51 were available at time points 2005, 2010 and 2013. All burden data were sourced from the findings  
52 of the Global Burden of Disease (GBD) study, for 2013[1,9,10] and for 2010[11,12]. Burden data from  
53 2005 were obtained directly from colleagues at the Institute for Health Metrics and Evaluation, USA.  
54  
55  
56  
57  
58  
59  
60

1  
2  
3 As defined by the GBD study, YLDs for a disease or injury are the sum of the YLDs for each sequela  
4 associated with the disease or injury[10]. DALYS are the sum of YLLs and YLDs for each age–sex–  
5 country group[9].  
6  
7  
8  
9

10 In order to allow direct comparison of relative investment with global health metrics across disease  
11 areas and between different time periods, metrics were adapted from the infectious disease  
12 analyses to estimate the ‘investment per mortality/DALY/YLD observed [7]’. The metrics were  
13 created using the following equation –  
14  
15  
16  
17

$$\text{(Total research investment up to the year before the time point / number of deaths, DALYs or YLD at time point) / number of years of investment included}$$

18  
19  
20  
21  
22  
23  
24 For example, for assessment of breast cancer mortality at the 2013 time point, we took the sum of  
25 breast cancer research investment 2000-2012 (£124,305,716) and divided that by number of deaths  
26 reported in 2013 (471000), and divided the result by the number of years of investment included  
27 (13) to get an ‘investment per mortality observed’ metric of £20.30.  
28  
29  
30  
31  
32

33 These metrics were applied for research relating to 16 site-specific cancers, where there was  
34 comparable data in both the ResIn and GBD studies. We defined lung cancer by aggregating  
35 ‘tracheal, bronchus and lung cancer’ burden data from the GBD study. Similarly, we defined skin  
36 cancer by aggregating ‘malignant skin melanoma’ and ‘non-malignant skin cancer’, and we defined  
37 upper gastrointestinal (GI) cancer by aggregating ‘oesophageal’ and ‘stomach cancer’. The use of  
38 total investment and the division by number of years included aimed to reduce the impact of the  
39 volatility of annual research funding and the relatively short periods between time points. Ranking  
40 scores of the investment metrics were developed for the 16 sites of cancer against 2013 burdens.  
41  
42  
43  
44  
45  
46  
47  
48  
49  
50  
51  
52  
53  
54  
55  
56  
57  
58  
59  
60  
61  
62  
63  
64  
65  
66  
67  
68  
69  
70  
71  
72  
73  
74  
75  
76  
77  
78  
79  
80  
81  
82  
83  
84  
85  
86  
87  
88  
89  
90  
91  
92  
93  
94  
95  
96  
97  
98  
99  
100  
101  
102  
103  
104  
105  
106  
107  
108  
109  
110  
111  
112  
113  
114  
115  
116  
117  
118  
119  
120  
121  
122  
123  
124  
125  
126  
127  
128  
129  
130  
131  
132  
133  
134  
135  
136  
137  
138  
139  
140  
141  
142  
143  
144  
145  
146  
147  
148  
149  
150  
151  
152  
153  
154  
155  
156  
157  
158  
159  
160  
161  
162  
163  
164  
165  
166  
167  
168  
169  
170  
171  
172  
173  
174  
175  
176  
177  
178  
179  
180  
181  
182  
183  
184  
185  
186  
187  
188  
189  
190  
191  
192  
193  
194  
195  
196  
197  
198  
199  
200  
201  
202  
203  
204  
205  
206  
207  
208  
209  
210  
211  
212  
213  
214  
215  
216  
217  
218  
219  
220  
221  
222  
223  
224  
225  
226  
227  
228  
229  
230  
231  
232  
233  
234  
235  
236  
237  
238  
239  
240  
241  
242  
243  
244  
245  
246  
247  
248  
249  
250  
251  
252  
253  
254  
255  
256  
257  
258  
259  
260  
261  
262  
263  
264  
265  
266  
267  
268  
269  
270  
271  
272  
273  
274  
275  
276  
277  
278  
279  
280  
281  
282  
283  
284  
285  
286  
287  
288  
289  
290  
291  
292  
293  
294  
295  
296  
297  
298  
299  
300  
301  
302  
303  
304  
305  
306  
307  
308  
309  
310  
311  
312  
313  
314  
315  
316  
317  
318  
319  
320  
321  
322  
323  
324  
325  
326  
327  
328  
329  
330  
331  
332  
333  
334  
335  
336  
337  
338  
339  
340  
341  
342  
343  
344  
345  
346  
347  
348  
349  
350  
351  
352  
353  
354  
355  
356  
357  
358  
359  
360  
361  
362  
363  
364  
365  
366  
367  
368  
369  
370  
371  
372  
373  
374  
375  
376  
377  
378  
379  
380  
381  
382  
383  
384  
385  
386  
387  
388  
389  
390  
391  
392  
393  
394  
395  
396  
397  
398  
399  
400  
401  
402  
403  
404  
405  
406  
407  
408  
409  
410  
411  
412  
413  
414  
415  
416  
417  
418  
419  
420  
421  
422  
423  
424  
425  
426  
427  
428  
429  
430  
431  
432  
433  
434  
435  
436  
437  
438  
439  
440  
441  
442  
443  
444  
445  
446  
447  
448  
449  
450  
451  
452  
453  
454  
455  
456  
457  
458  
459  
460  
461  
462  
463  
464  
465  
466  
467  
468  
469  
470  
471  
472  
473  
474  
475  
476  
477  
478  
479  
480  
481  
482  
483  
484  
485  
486  
487  
488  
489  
490  
491  
492  
493  
494  
495  
496  
497  
498  
499  
500  
501  
502  
503  
504  
505  
506  
507  
508  
509  
510  
511  
512  
513  
514  
515  
516  
517  
518  
519  
520  
521  
522  
523  
524  
525  
526  
527  
528  
529  
530  
531  
532  
533  
534  
535  
536  
537  
538  
539  
540  
541  
542  
543  
544  
545  
546  
547  
548  
549  
550  
551  
552  
553  
554  
555  
556  
557  
558  
559  
560  
561  
562  
563  
564  
565  
566  
567  
568  
569  
570  
571  
572  
573  
574  
575  
576  
577  
578  
579  
580  
581  
582  
583  
584  
585  
586  
587  
588  
589  
590  
591  
592  
593  
594  
595  
596  
597  
598  
599  
600  
601  
602  
603  
604  
605  
606  
607  
608  
609  
610  
611  
612  
613  
614  
615  
616  
617  
618  
619  
620  
621  
622  
623  
624  
625  
626  
627  
628  
629  
630  
631  
632  
633  
634  
635  
636  
637  
638  
639  
640  
641  
642  
643  
644  
645  
646  
647  
648  
649  
650  
651  
652  
653  
654  
655  
656  
657  
658  
659  
660  
661  
662  
663  
664  
665  
666  
667  
668  
669  
670  
671  
672  
673  
674  
675  
676  
677  
678  
679  
680  
681  
682  
683  
684  
685  
686  
687  
688  
689  
690  
691  
692  
693  
694  
695  
696  
697  
698  
699  
700  
701  
702  
703  
704  
705  
706  
707  
708  
709  
710  
711  
712  
713  
714  
715  
716  
717  
718  
719  
720  
721  
722  
723  
724  
725  
726  
727  
728  
729  
730  
731  
732  
733  
734  
735  
736  
737  
738  
739  
740  
741  
742  
743  
744  
745  
746  
747  
748  
749  
750  
751  
752  
753  
754  
755  
756  
757  
758  
759  
760  
761  
762  
763  
764  
765  
766  
767  
768  
769  
770  
771  
772  
773  
774  
775  
776  
777  
778  
779  
780  
781  
782  
783  
784  
785  
786  
787  
788  
789  
790  
791  
792  
793  
794  
795  
796  
797  
798  
799  
800  
801  
802  
803  
804  
805  
806  
807  
808  
809  
810  
811  
812  
813  
814  
815  
816  
817  
818  
819  
820  
821  
822  
823  
824  
825  
826  
827  
828  
829  
830  
831  
832  
833  
834  
835  
836  
837  
838  
839  
840  
841  
842  
843  
844  
845  
846  
847  
848  
849  
850  
851  
852  
853  
854  
855  
856  
857  
858  
859  
860  
861  
862  
863  
864  
865  
866  
867  
868  
869  
870  
871  
872  
873  
874  
875  
876  
877  
878  
879  
880  
881  
882  
883  
884  
885  
886  
887  
888  
889  
890  
891  
892  
893  
894  
895  
896  
897  
898  
899  
900  
901  
902  
903  
904  
905  
906  
907  
908  
909  
910  
911  
912  
913  
914  
915  
916  
917  
918  
919  
920  
921  
922  
923  
924  
925  
926  
927  
928  
929  
930  
931  
932  
933  
934  
935  
936  
937  
938  
939  
940  
941  
942  
943  
944  
945  
946  
947  
948  
949  
950  
951  
952  
953  
954  
955  
956  
957  
958  
959  
960  
961  
962  
963  
964  
965  
966  
967  
968  
969  
970  
971  
972  
973  
974  
975  
976  
977  
978  
979  
980  
981  
982  
983  
984  
985  
986  
987  
988  
989  
990  
991  
992  
993  
994  
995  
996  
997  
998  
999  
1000

1  
2  
3 **Patient involvement**  
4

5  
6 There was no patient involvement in this study.  
7  
8  
9  
10  
11  
12  
13  
14  
15  
16  
17  
18  
19  
20  
21  
22  
23  
24  
25  
26  
27  
28  
29  
30  
31  
32  
33  
34  
35  
36  
37  
38  
39  
40  
41  
42  
43  
44  
45  
46  
47  
48  
49  
50  
51  
52  
53  
54  
55  
56  
57  
58  
59  
60

For peer review only

## Results

We identified 4,299 funded studies that met our inclusion criteria (Table 1). The funding for these studies represented a total research investment of almost £2.4 billion. The mean award amount for each study was £555,513 (standard deviation (SD) £1,429,510) and median was £231,559 (inter-quartile range £114,619 – 487,063). 2,416 awards (56.2% of total) were designated towards a named site-specific cancer (Table 1), equating to £1.0 billion (40.3% of total). The top five cancer sites in terms of award number were haematological, breast, colorectal, prostate, and skin; the bottom five were testicular, bone, bladder, thyroid, and cholangiocarcinoma (Table 1). The top five cancer sites in terms of total funding were haematological, breast, prostate, colorectal and ovarian; the bottom five were testicular, mesothelioma, thyroid, bladder and chlangiocarinoma. Mean funding per award varied greatly between sites with prostate cancer receiving the most (£1.47 million) and bladder cancer the least (£117,385).

The top five areas of primary research focus, by number of awards, were drug therapy, diagnostic, screening and monitoring, women's health, immunology, and pathogenesis; the bottom five areas were men's health, surgery, occupational health, global health and geriatrics (Table 2). In terms of net funding, the top five areas of research were pathogenesis, drug therapy, diagnostic, screening and monitoring, women's health, and immunology; the bottom five were surgery, psychosocial, global health, occupational health, and geriatrics.

The majority of awards were focused on pre-clinical science, accounting for 66.2% of award numbers and 62.2% of all funding (Table 3). In terms of award number, this was followed by public health, cross-disciplinary, phase I-III, and product development. This order was reflected in terms of net investment, although cross-disciplinary studies ranked ahead of public health studies. Phase I-III clinical trials received the highest mean funding per award, at £736,172 (SD £3,361,312), whilst public health research received the least, at £496,744 (SD £1,000,757).

1  
2  
3 The largest individual funder of cancer research of the studies identified was the Medical Research  
4 Council, accounting for 35.1% of all funding (Table 4). The charitable sector was responsible for  
5 39.5% of all awards (excluding CRUK) but 17.4% of funding. The European Commission was  
6 responsible for the largest mean grant per award (£1.58 million).  
7  
8  
9

10  
11 We generated a compound ranking score for the 16 sites of cancer against 2013 global disease  
12 burdens, across mortality, DALYs, and YLDs (table 5). The amount of investment per unit disease  
13 burden (£ per death/DALY/YLD) were used to compile this compound ranking score. The data for all  
14 site-specific cancers measured here are presented in the supplementary information (Supplemental  
15 Tables 1-3, Supplemental Figures 1-3). We identified the five sites that received the most funding  
16 relative to disease burden as prostate, ovarian, breast, mesothelioma and testicular cancer. The  
17 least well-funded sites relative to disease burden were cancers of the liver, thyroid, lung, upper GI,  
18 and bladder.  
19  
20  
21  
22  
23  
24  
25  
26  
27  
28  
29

30 We were able to obtain some disaggregated data for 3,284 CRUK research grants during the period  
31 of interest but this excluded individual award data. Compared to the aggregation of all other  
32 funders, CRUK placed more of a focus on funding towards cancers of the prostate, ovary and liver –  
33 by study number these sites accounted for 6.9%, 3.4% and 2.7% of CRUK funded studies compared  
34 to 2.1%, 1.1% and 0.9% of all studies in our quantitative database, respectively. CRUK preferentially  
35 funded research investigating pathogenesis, which accounted for 51.0% of all grants awarded. In  
36 comparison, only 5.3% of all awards in our quantitative database were identified as primarily  
37 focused on pathogenesis.  
38  
39  
40  
41  
42  
43  
44  
45  
46  
47

## 48 Discussion

49  
50 We identified 4,299 funded studies, with a total research investment of £2.4 billion. We performed  
51 qualitative analysis on a further 3,284 CRUK funded awards. The vast majority of all awards awarded  
52 were investigating at least one of pathogenesis, diagnosis, monitoring and screening and drug  
53 therapy. In the absence of CRUK data, the Medical Research Council and the Department of Health  
54  
55  
56  
57  
58  
59  
60

1  
2  
3 were the two leading funding sources. Preclinical research accounted for £1.5 billion (62.2%) of total  
4  
5 R&D investment. Four of the five highest funded cancer sites relative to global disease burden were  
6  
7 gender-specific – namely prostate, ovarian, breast, and testicular cancers. Cancer research with a  
8  
9 clear focus on women’s health accounted for 640 studies (14.9%) and £199.5 million (8.4%) of  
10  
11 investment. In comparison, 111 studies (2.6%) and £143.3 million (6.0%) of investment had a clear  
12  
13 link with men’s health. This may reflect the successes of various institutions and charities that have  
14  
15 sought to increase awareness of these sex-specific cancers. Breast cancer, the most commonly  
16  
17 diagnosed cancer in the UK and the leading cause of cancer death in women, and prostate cancer,  
18  
19 the second most frequently diagnosed cancer and the sixth leading cause of cancer death among  
20  
21 men, were found to be relatively well funded[1,13].  
22  
23

24  
25 We highlight several cancer sites where there might be underinvestment, namely that of liver,  
26  
27 thyroid, lung, upper GI tract, and bladder. In our analysis cancer of the upper GI tract combines  
28  
29 oesophageal and stomach cancer. These site-specific cancers identified to be relatively underfunded  
30  
31 account for a substantial proportion of global cancer burden. Globally, these sites account for 47.9%,  
32  
33 44.3% and 20.4% of the global mortality[1], DALYs[9] and YLDs[10] of all cancers, respectively. The  
34  
35 disparity between YLDs and DALYs demonstrates the poor prognosis and high mortality of these  
36  
37 particular sites when compared against all neoplastic disease. Lung, liver, stomach and oesophagus  
38  
39 are the first, second, third and fifth, leading sites of neoplastic mortality worldwide[1].  
40  
41

42  
43 Two previous studies have compared UK cancer funding with years of life lost (YLLs). Burnett et al  
44  
45 [14] reported the relative over-funding of breast cancers and leukaemia. Carter et al [15] likewise  
46  
47 reported higher levels of funding than their burden suggests of testicular, leukaemia, Hodgkin’s  
48  
49 lymphoma, breast, cervical, ovarian, prostate cancer with relative underfunding of gallbladder, lung,  
50  
51 nasopharyngeal, intestine, stomach, pancreatic, thyroid, oesophageal, liver, kidney, bladder, and  
52  
53 brain/central nervous system. Although our site-specific classifications differed slightly, our findings  
54  
55 are consistent with these previous studies. The slight differences that we report are likely due to our  
56  
57  
58  
59  
60

1  
2  
3 metrics which seek to capture mortality (global mortality and DALYs) and life burden (DALYs and  
4 YLDs) rather than just mortality, and also different included components in the respective datasets.  
5  
6

7  
8 With regard to interventions research, there is heavy investment in drug-based modalities. £620.9  
9 million (26.0%) was invested in novel drug therapies and £194.1 million (8.1%) was invested in the  
10 emergent role of immunomodulation. In comparison, funding towards radiotherapy and surgical  
11 interventions accounted for £88.2 million (3.7%) and £37.9 million (1.6%), respectively. In high-  
12 income settings, around half of new cancer diagnoses will undergo a course of radiotherapy  
13 treatment during their clinical management; roughly a quarter will receive two or more  
14 courses[16,17]. Globally, over 80% of cancer cases will warrant surgical intervention, where it has  
15 preventative, diagnostic, curative, supportive, palliative, and reconstructive roles[18].  
16  
17

18  
19 Analysis by R&D pipeline showed that research investment in the UK places a heavy emphasis on  
20 pre-clinical research, but relatively little investment towards phase I-III clinical trials or product  
21 development, and this is line with previous research in infectious disease investment[6]. This may  
22 reflect the strengths of UK institutions in preclinical science, but also could suggest a need to  
23 strengthen research capacity further down the R&D chain. It would be useful to determine whether  
24 investment reflects the priorities of funding agencies and whether this is comparable to research  
25 investment in other countries. We noted a lack of readily available data from the pharmaceutical  
26 industry and this is likely to leave a data gap in particular for sum totals of investment in clinical trials  
27 of pharmaceutical products.  
28  
29

30  
31 Our findings contribute to the development of transparent and objective methods to couple the  
32 allocation of limited research funds with disease burden. Previous studies have suggested that  
33 financial investment might appropriately be coupled with DALYs as a measure of burden[19–22].  
34  
35 Furthermore, previous UK research suggests that publicly funded cancer research offers substantial  
36 rates of return in terms of both health and monetary benefit [23]. We have further sought to  
37 incorporate mortality rates and YLDs into the consideration of cancer research investment.  
38  
39  
40  
41  
42  
43  
44  
45  
46  
47  
48  
49  
50  
51  
52  
53  
54  
55  
56  
57  
58  
59  
60

1  
2  
3 We have chosen to compare cancer research funding to global rather than domestic UK disease  
4  
5 burden. Due to increasing globalization, the emergence of non-communicable disease burden in  
6  
7 resource poor settings, the internationalization of healthcare, the flow of people across national  
8  
9 borders and the role of the UK as an international centre of biomedical research, we believe this  
10  
11 approach to be justified.  
12

13  
14 However, defining an appropriate amount of research investment for each site specific cancer is  
15  
16 challenging since cancers of similar disease burdens may warrant different levels of investment to  
17  
18 develop cost-effective interventions. Decisions may be influenced by any of a number of factors, for  
19  
20 example due to exceptional need, as may be the case in mesothelioma, or due to public awareness  
21  
22 and third-party lobbying, as may be the case with regards to the gender-specific cancers.  
23  
24

25  
26 A variety of factors contribute towards the difficulty in tracking net cancer research investment  
27  
28 within the UK. Fragmentation of data from a large number of diverse public and private sources of  
29  
30 funding, poorly designed donor accounting structures, where available, and the paucity of  
31  
32 information from the private sector limit the evidence base to inform policy in real-time. In our  
33  
34 study, we were unable to obtain quantitative data from CRUK, the world's largest cancer research  
35  
36 charity and a leader in cancer research. They do not routinely publish or make available  
37  
38 disaggregated investment data which is, in our experience across the infection and cancer analyses,  
39  
40 unique amongst the more high-profile UK funders who are universally more transparent in their  
41  
42 award decisions[24]. Transparency in the tracking and monitoring of cancer research financing is  
43  
44 essential to enable accountability and equity in resource allocation and to facilitate further future  
45  
46 research in this area.  
47  
48

49  
50 In this study we systematically analyse UK investment in cancer research and identify areas of  
51  
52 relative neglect. Although the competitive application process used by most funders to allocate  
53  
54 research grants ensure a portfolio of high quality, the absence of explicit resource allocation criteria  
55  
56 could contribute towards inequalities in R&D by disease burden. Funding agencies will have  
57  
58  
59  
60



1  
2  
3 particular areas of focus, and UK funders may have considered the focus of international agencies in  
4  
5 their own research strategies. As a result, international data is essential to complete the mapping of  
6  
7 cancer research investment. Nevertheless, our findings will inform funders and contribute towards  
8  
9 policy discussions to prevent inequity in the allocation of limited resources.  
10

11  
12 By demonstrating the relationship between disease burden and research funding, we enable the  
13  
14 identification of potential investment gaps. However, it is not possible to equate gaps in funding  
15  
16 with areas of neglect without consideration of other influences such as the feasibility of research,  
17  
18 costs of technologies, infrastructure and skill requirements, political and social considerations, and  
19  
20 the accuracy of disease burden estimates.  
21

22  
23 There are several potential limitations to our study. We are dependent on the accuracy of original  
24  
25 investment data as sourced from the funding bodies. Although checks were made on any obvious  
26  
27 discrepancies or errors, interpretation of these original data may contain errors. We made no  
28  
29 attempt to investigate the contribution of any indirect or estate costs. Currency conversions were  
30  
31 averaged across each financial year and any intra-year fluctuations may not have been captured.  
32  
33 Unless clearly documented, we were unable to assess how funding was distributed from lead  
34  
35 institutions to collaborative partners. We considered individual awards, rather than number of  
36  
37 studies.  
38  
39

40  
41 Furthermore, assignment of disease categories and allocation of studies according to these  
42  
43 categories is subjective, and there might be disagreements regarding certain inclusion criteria. As  
44  
45 YLLs were not included in our analysis, we may underrepresent the disease burden of cancers that  
46  
47 occur disproportionately in the young and which are associated with poor survival, notably cancers  
48  
49 of the ovary, cervix and CNS [14]. However, we would expect any additional information offered by  
50  
51 YLL analysis to be predominantly captured by use of DALYs.  
52  
53

54  
55 We could not openly access data of private sector research funding, nor were we able to obtain  
56  
57 disaggregated award data from CRUK. Whilst our analysis did demonstrate that CRUK funding (with  
58  
59  
60

1  
2  
3 some exceptions) broadly reflected the findings of our quantitative database, it is likely that  
4  
5 substantial awards towards particular areas of research could skew results; for example, the CRUK  
6  
7 accounts for 2014/15 suggest £394 million was invested into research or research-related activity,  
8  
9 and we hypothesise that much of that would have met our inclusion criteria for this analysis[25].

10  
11 Disease burden measures are typically an estimate and are subject to the potential introduction of  
12  
13 bias from missing or unobtainable data as well as from differences in classification and diagnosis.

14  
15 Our report presents the latest investment data on cancer research awarded to UK institution  
16  
17 between 2000 and 2013. Cancers of the liver, thyroid, lung, upper GI tract, and bladder as well as  
18  
19 research towards radiotherapy and surgical techniques in particular may warrant increased rates of  
20  
21 investment. We will make the entire database and associated figures available online  
22  
23 ([www.researchinvestment.org](http://www.researchinvestment.org)) to assist policy makers, funding organisations, and researchers in the  
24  
25 identification of investment gaps. We further encourage funding organisations to make their  
26  
27 investment portfolios openly accessible to facilitate future research.  
28  
29

30  
31 We hope that open funding data in this area can contribute to redressing the misalignments in  
32  
33 investments for cancer research. Cancer research can improve the clinical course of disease and  
34  
35 offer tangible improvements in health outcomes[23]. Both policy makers and the scientific  
36  
37 community need to ensure that limited resources are allocated appropriately to most effectively  
38  
39 alleviate the morbidity and mortality associated with cancer.  
40  
41  
42  
43  
44  
45  
46  
47  
48  
49  
50  
51  
52  
53  
54  
55  
56  
57  
58  
59  
60

**Contributions**

MM and MGH are the guarantors of this study. MM, MGH, JRF and RA conceived and designed the study. MGH, CDZ, BJG and MAE-H obtained the data. MM and MGH conducted data formatting and statistical analysis. All authors helped interpret the findings. MM, MGH and CDZ wrote the first draft of the manuscript with input from RR, JRF and RA; all authors provided input to subsequent drafts. All authors had full access to all of the data in the study and take responsibility for its integrity and the accuracy of data analysis.

**Transparency declaration**

MM affirms that the manuscript is an honest, accurate, and transparent account of the study being reported; that no important aspects of the study have been omitted; and that any discrepancies from the study as planned (and, if relevant, registered) have been explained.

**Funding**

No funding was received for this study

**Competing interests**

All authors declare no support from any organisation for the submitted work; no financial relationships with any organisations that might have an interest in the submitted work in the previous three years; no other relationships or activities that could appear to have influenced the submitted work.

**Ethical approval**

Not required

**Data sharing**

1  
2  
3  
4  
5  
6  
7  
8  
9  
10  
11  
12  
13  
14  
15  
16  
17  
18  
19  
20  
21  
22  
23  
24  
25  
26  
27  
28  
29  
30  
31  
32  
33  
34  
35  
36  
37  
38  
39  
40  
41  
42  
43  
44  
45  
46  
47  
48  
49  
50  
51  
52  
53  
54  
55  
56  
57  
58  
59  
60

All data used is publicly available. Entire database and associated figures are permanently available with open access online ([www.researchinvestment.org](http://www.researchinvestment.org)) to assist policy makers, funding organisations, and researchers.

For peer review only

## References

- 1 Naghavi M, Wang H, Lozano R, *et al*. Global, regional, and national age-sex specific all-cause and cause-specific mortality for 240 causes of death, 1990-2013: A systematic analysis for the Global Burden of Disease Study 2013. *Lancet* 2015;**385**:117–71.
- 2 Jemal A, Bray F, Center MM, *et al*. Global Cancer Statistics: 2011. *CA Cancer J Clin* 2011;**61**:69–90.<http://www.ncbi.nlm.nih.gov/pubmed/21296855>
- 3 Torre LA, Bray F, Siegel RL, *et al*. Global Cancer Statistics, 2012. *CA a cancer J Clin* 2015;**65**:87–108.<http://onlinelibrary.wiley.com/doi/10.3322/caac.21262/abstract>
- 4 Luengo-Fernandez R, Leal J, Gray A, *et al*. Economic burden of cancer across the European Union: a population-based cost analysis. *Lancet Oncol* 2013;**14**:1165–74.<http://ovidsp.ovid.com/ovidweb.cgi?T=JS&CSC=Y&NEWS=N&PAGE=fulltext&D=medl&AN=24131614>
- 5 Yabroff KR, Lund J, Kepka D, *et al*. Economic Burden of Cancer in the United States: Estimates, Projections, and Future Research. *Cancer Epidemiol Biomarkers Prev* 2011;**20**:2006–14.<Go to ISI>://WOS:000295717900003
- 6 Head MG, Fitchett JR, Cooke MK, *et al*. UK investments in global infectious disease research 1997-2010: A case study. *Lancet Infect Dis* 2013;**13**:55–64.
- 7 Head MG, Fitchett JR, Nageshwaran V, *et al*. Research Investments in Global Health: A Systematic Analysis of UK Infectious Disease Research Funding and Global Health Metrics, 1997–2013. *EBioMedicine* 2016;**3**:180–90.<http://dx.doi.org/10.1016/j.ebiom.2015.12.016>
- 8 Head MG, Fitchett JR, Derrick G, *et al*. Comparing research investment to United Kingdom institutions and published outputs for tuberculosis, HIV and malaria: a systematic analysis across 1997-2013. *Health Res Policy Syst* 2015;**13**:63.<http://www.health-policy-systems.com/content/13/1/63>
- 9 Murray CJL, Barber RM, Foreman KJ, *et al*. Global, regional, and national disability-adjusted life years (DALYs) for 306 diseases and injuries and healthy life expectancy (HALE) for 188 countries, 1990–2013: quantifying the epidemiological transition. *Lancet* 2015;**386**:2145–91.
- 10 Vos T, Barber RM, Bell B, *et al*. Global, regional, and national incidence, prevalence, and years lived with disability for 301 acute and chronic diseases and injuries in 188 countries, 1990–2013: a systematic analysis for the Global Burden of Disease Study 2013. *Lancet* 2015;**386**:743–800.
- 11 Murray CJ, Vos T, Lozano R, *et al*. Disability-adjusted life years (DALYs) for 291 diseases and injuries in 21 regions, 1990-2010: a systematic analysis for the Global Burden of Disease Study 2010. *Lancet* 2012;**380**:2197–223.<http://www.ncbi.nlm.nih.gov/pubmed/23245608>
- 12 Lozano R, Naghavi M, Foreman K, *et al*. Global and regional mortality from 235 causes of death for 20 age groups in 1990 and 2010: A systematic analysis for the Global Burden of Disease Study 2010. *Lancet* 2012;**380**:2095–128.

- 1  
2  
3 13 Jemal A, Bray F, Center MM, Ferlay J, Ward E FD. Global cancer statistics. *Cancer J Clin*  
4 2011;**61**:69–90.
- 5  
6 14 Burnet NG, Jefferies SJ, Benson RJ, *et al*. Years of life lost (YLL) from cancer is an important  
7 measure of population burden--and should be considered when allocating research funds. *Br*  
8 *J Cancer* 2005;**92**:241–5.
- 9  
10 15 Carter AJR, Delarosa B, Hur H. An analysis of discrepancies between United Kingdom cancer  
11 research funding and societal burden and a comparison to previous and United States values.  
12 *Heal Res Policy Syst* 2015;**13**:62.<http://www.health-policy-systems.com/content/13/1/62>
- 13  
14 16 Barton MB, Frommer M, Shafiq J. Role of radiotherapy in cancer control in low-income and  
15 middle-income countries. *Lancet Oncol* 2006;**7**:584–95.[http://ac.els-](http://ac.els-cdn.com/S1470204506707598/1-s2.0-S1470204506707598-main.pdf?_tid=41dac6b8-7fa0-11e3-a45c-0000aab0f27&acdnat=1389981382_3394f8c1d926c07e5acaad4254556251)  
16 [cdn.com/S1470204506707598/1-s2.0-S1470204506707598-main.pdf?\\_tid=41dac6b8-7fa0-](http://ac.els-cdn.com/S1470204506707598/1-s2.0-S1470204506707598-main.pdf?_tid=41dac6b8-7fa0-11e3-a45c-0000aab0f27&acdnat=1389981382_3394f8c1d926c07e5acaad4254556251)  
17 [11e3-a45c-0000aab0f27&acdnat=1389981382\\_3394f8c1d926c07e5acaad4254556251](http://ac.els-cdn.com/S1470204506707598/1-s2.0-S1470204506707598-main.pdf?_tid=41dac6b8-7fa0-11e3-a45c-0000aab0f27&acdnat=1389981382_3394f8c1d926c07e5acaad4254556251)
- 18  
19 17 Barton MB, Jacob S, Shafiq J, *et al*. Estimating the demand for radiotherapy from the  
20 evidence: a review of changes from 2003 to 2012. *Radiother Oncol* 2014;**112**:140–4.
- 21  
22 18 Sullivan R, Alatisse OI, Anderson BO, *et al*. Global cancer surgery: Delivering safe, affordable,  
23 and timely cancer surgery. *Lancet Oncol*. 2015;**16**:1193–224.
- 24  
25 19 Gross CP, Anderson GF, Powe NR. The relation between funding by the National Institutes of  
26 Health and the burden of disease. *N Engl J Med* 1999;**340**:1881–7.
- 27  
28 20 Lopez FC, Martin EA, Maleras RG, *et al*. Relationship between Research Funding in the  
29 Spanish National Health System and the Burden of Disease. *Rev Esp Salud Publica*  
30 2009;**83**:137–51.<Go to ISI>://WOS:000266635200011
- 31  
32 21 Mitchell RJ, McClure RJ, Olivier J, *et al*. Rational allocation of Australia’s research dollars: does  
33 the distribution of NHMRC funding by National Health Priority Area reflect actual disease  
34 burden? *Med J Aust* 2009;**191**:648.
- 35  
36 22 Lamarre-Cliche M, Castilloux AM, LeLorier J. Association between the burden of disease and  
37 research funding by the Medical Research Council of Canada and the National Institutes of  
38 Health. A cross-sectional study. *Clin Invest Med* 2001;**24**:83–  
39 9.<http://www.ncbi.nlm.nih.gov/pubmed/11368150>
- 40  
41 23 Glover M, Buxton M, Guthrie S, *et al*. Estimating the returns to UK publicly funded cancer-  
42 related research in terms of the net value of improved health outcomes. *BMC Med*  
43 2014;**12**:1.
- 44  
45 24 Fitchett JRA, Sharara N, Head MG, *et al*. Transparency and availability of data for cancer  
46 research. *Lancet* 2016;**388**:866–7.[http://dx.doi.org/10.1016/S0140-6736\(16\)31427-1](http://dx.doi.org/10.1016/S0140-6736(16)31427-1)
- 47  
48 25 CRUK. Annual report and accounts 2014/15. 2015.  
49 [http://www.cancerresearchuk.org/sites/default/files/annual\\_report\\_and\\_accounts\\_2014-](http://www.cancerresearchuk.org/sites/default/files/annual_report_and_accounts_2014-15.pdf)  
50 [15.pdf](http://www.cancerresearchuk.org/sites/default/files/annual_report_and_accounts_2014-15.pdf)  
51  
52  
53  
54  
55  
56  
57  
58  
59  
60

## Table Legends

**Table 1:** Cancer research investment awards and funding by site. All investment reported in 2013 UK pounds.

| Site of cancer     | All funders where investment data was available |                     |                       |                     |                         |                               | Cancer Research UK |                                            |
|--------------------|-------------------------------------------------|---------------------|-----------------------|---------------------|-------------------------|-------------------------------|--------------------|--------------------------------------------|
|                    | Number of awards                                | Percentage of total | Sum investment (£)    | Percentage of total | Mean award, £ (SD)      | Median award, £ (IQR)         | Number of awards   | Percentage of all oncology research awards |
| Breast             | 571                                             | 13.3%               | £137,960,107          | 5.8%                | 241611 (414584)         | 135752 (25000-216673)         | 273                | 8.3%                                       |
| Haematological     | 1158                                            | 26.9%               | £381,008,394          | 16.0%               | 329022 (476943)         | 186813 (120437-272324)        | 225                | 6.9%                                       |
| Colorectal         | 147                                             | 3.4%                | £77,279,857           | 3.2%                | 525713 (674881)         | 251800 (102078-819866)        | 205                | 6.2%                                       |
| Prostate           | 92                                              | 2.1%                | £135,290,779          | 5.7%                | 1470552 (6156372)       | 333757 (155227-721037)        | 123                | 3.7%                                       |
| Ovarian            | 48                                              | 1.1%                | £44,709,938           | 1.9%                | 931457 (3380145)        | 226764 (131990-627401)        | 112                | 3.4%                                       |
| Lung               | 82                                              | 1.9%                | £24,263,280           | 1.0%                | 295893 (556278)         | 146123 (66701-242934)         | 89                 | 2.7%                                       |
| Skin               | 87                                              | 2.0%                | £22,179,011           | 0.9%                | 254931 (453726)         | 85406 (69629-248603)          | 84                 | 2.6%                                       |
| Brain              | 22                                              | 0.5%                | £9,994,255            | 0.4%                | 454284 (498933)         | 401046 (196928-528008)        | 83                 | 2.5%                                       |
| Upper GI and       | 18                                              | 0.4%                | £19,094,230           | 0.8%                | 1060791 (1448010)       | 788850 (80964-1296962)        | 80                 | 2.4%                                       |
| Head and neck      | 20                                              | 0.5%                | £18,250,632           | 0.8%                | 912531 (1003091)        | 389751 (167358-1602465)       | 68                 | 2.1%                                       |
| Renal              | 19                                              | 0.4%                | £13,885,496           | 0.6%                | 730815 (678732)         | 479197 (244075-1252574)       | 48                 | 1.5%                                       |
| Bladder            | 10                                              | 0.2%                | £1,173,856            | 0.0%                | 117385 (106902)         | 94520 (29264- 173855)         | 48                 | 1.5%                                       |
| Cervical           | 26                                              | 0.6%                | £14,328,402           | 0.6%                | 551092 (877250)         | 210179 (88934-368402)         | 43                 | 1.3%                                       |
| Pancreatic         | 16                                              | 0.4%                | £9,453,577            | 0.4%                | 590848 (519850)         | 276237 (191804-1033948)       | 40                 | 1.2%                                       |
| Bone               | 13                                              | 0.3%                | £17,242,183           | 0.7%                | 1326322 (1604685)       | 685853 (243559-1999907)       | 29                 | 0.9%                                       |
| Liver              | 37                                              | 0.9%                | £25,037,541           | 1.0%                | 676690 (847151)         | 319082 (177974-776480)        | 20                 | 0.6%                                       |
| Mesothelioma       | 30                                              | 0.7%                | £4,476,088            | 0.2%                | 149202 (101201)         | 137103 (95895-205500)         | 11                 | 0.3%                                       |
| Cholangiocarcinoma | 2                                               | 0.0%                | £582,405              | 0.0%                | n/a                     | n/a                           | 11                 | 0.3%                                       |
| Testicular         | 14                                              | 0.3%                | £5,949,990            | 0.2%                | 424999 (507277)         | 242175 (102938-411010)        | 11                 | 0.3%                                       |
| Thyroid            | 4                                               | 0.1%                | £1,375,881            | 0.1%                | n/a                     | n/a                           | 7                  | 0.2%                                       |
| <b>Total</b>       | <b>4299</b>                                     |                     | <b>£2,388,152,318</b> |                     | <b>555513 (1429510)</b> | <b>231559 (114619-487063)</b> | <b>3284</b>        |                                            |

**Table 2:** Cancer research investment awards and funding by cross-cutting theme. All investment reported in 2013 UK pounds.

| Cross-cutting theme                  | All funders where investment data was available |                     |                       |                     |                         |                               | Cancer Research UK |                                            |
|--------------------------------------|-------------------------------------------------|---------------------|-----------------------|---------------------|-------------------------|-------------------------------|--------------------|--------------------------------------------|
|                                      | Number of awards                                | Percentage of total | Sum investment (£)    | Percentage of total | Mean award, £ (SD)      | Median award, £ (IQR)         | Number of awards   | Percentage of all oncology research awards |
| Pathogenesis (mechanism)             | 227                                             | 5.3%                | £1,374,387,838        | 57.6%               | 543881 (955710)         | 248573 (135752-506232)        | 1674               | 51.0%                                      |
| Drug Therapy                         | 1104                                            | 25.7%               | £620,961,060          | 26.0%               | 562464 (1910050)        | 202342 (105622-436559)        | 935                | 28.5%                                      |
| Diagnostic, Screening and Monitoring | 681                                             | 15.8%               | £359,618,823          | 15.1%               | 528074 (1155156)        | 205728 (102672-513836)        | 404                | 12.3%                                      |
| Women's Health                       | 640                                             | 14.9%               | £199,534,693          | 8.4%                | 311773 (1041520)        | 153845 (56515-227202)         | 287                | 8.7%                                       |
| Immunology (inc. biologics)          | 451                                             | 10.5%               | £194,086,617          | 8.1%                | 430347 (760955)         | 240052 (125669-466250)        | 212                | 6.5%                                       |
| Radiotherapy                         | 112                                             | 2.6%                | £88,262,353           | 3.7%                | 788056 (2413445)        | 243333 (106175-439419)        | 209                | 6.4%                                       |
| Psychosocial                         | 117                                             | 2.7%                | £23,445,835           | 1.0%                | 200391 (352410)         | 87463 (27317-239059)          | 122                | 3.7%                                       |
| Men's Health                         | 111                                             | 2.6%                | £143,392,908          | 6.0%                | 1291828 (5617919)       | 285203 (126037-700353)        | 120                | 3.7%                                       |
| Paediatrics                          | 175                                             | 4.1%                | £62,641,938           | 2.6%                | 357953 (547484)         | 183099 (89522-322261)         | 118                | 3.6%                                       |
| Surgery                              | 72                                              | 1.7%                | £37,900,334           | 1.6%                | 526393 (684908)         | 235413 (97890-761651)         | 95                 | 2.9%                                       |
| Infection-associated                 | 129                                             | 3.0%                | £56,819,379           | 2.4%                | 440460 (798013)         | 231836 (134693-439378)        | 48                 | 1.5%                                       |
| Global Health                        | 12                                              | 0.3%                | £6,434,960            | 0.3%                | 536246 (1089118)        | 129738 (77519-459274)         | 12                 | 0.4%                                       |
| Geriatrics                           | 7                                               | 0.2%                | £1,616,394            | 0.1%                | 230913 (254925)         | 121623 (76421-262167)         | 8                  | 0.2%                                       |
| Occupational Health                  | 18                                              | 0.4%                | £2,576,841            | 0.1%                | 143157 (116928)         | 137103 (33857-199998)         | 8                  | 0.2%                                       |
| <b>Total</b>                         | <b>4299</b>                                     |                     | <b>£2,388,152,318</b> |                     | <b>555513 (1429510)</b> | <b>231559 (114619-487063)</b> | <b>3284</b>        |                                            |



**Table 3:** Cancer research investment awards and funding by type of science. All investment reported in 2013 UK pounds.

|                     | All funders where investment data was available |                     |                       |                     |                         |                               | Cancer Research UK |                                            |
|---------------------|-------------------------------------------------|---------------------|-----------------------|---------------------|-------------------------|-------------------------------|--------------------|--------------------------------------------|
| Type of science     | Number of awards                                | Percentage of total | Sum investment (£)    | Percentage of total | Mean award, £ (SD)      | Median award, £ (IQR)         | Number of awards   | Percentage of all oncology research awards |
| Pre-clinical        | 2845                                            | 66.2%               | £1,485,997,379        | 62.2%               | 522318 (1006600)        | 240974 (132188-490872)        | 1809               | 55.1%                                      |
| Phase I-III         | 303                                             | 7.0%                | £223,060,276          | 9.3%                | 736172 (3361312)        | 178535 (70934-502399)         | 647                | 19.7%                                      |
| Product development | 172                                             | 4.0%                | £104,214,364          | 4.4%                | 605897 (2213394)        | 193051 (75270-360813)         | 52                 | 1.6%                                       |
| Cross-disciplinary  | 441                                             | 10.3%               | £315,145,351          | 13.2%               | 714615 (1586882)        | 238523 (126589-703764)        | 328                | 10.0%                                      |
| Public health       | 512                                             | 11.9%               | £254,333,282          | 10.6%               | 496744 (1000757)        | 209364 (82870-383623)         | 443                | 13.5%                                      |
| Unable to specify   | 26                                              | 0.6%                | £5,401,666            | 0.2%                | n/a                     | n/a                           | 5                  | 0.2%                                       |
| <b>Total</b>        | <b>4299</b>                                     |                     | <b>£2,388,152,318</b> |                     | <b>555513 (1429510)</b> | <b>231559 (114619-487063)</b> | <b>3284</b>        |                                            |

**Table 4:** Cancer research investment awards and funding by funding agency (excluding CRUK). All investment reported in 2013 UK pounds.

| Funder                                | All funders where investment data was available |                     |                       |                     |                         |                               |
|---------------------------------------|-------------------------------------------------|---------------------|-----------------------|---------------------|-------------------------|-------------------------------|
|                                       | Number of awards                                | Percentage of total | Sum investment (£)    | Percentage of total | Mean award, £ (SD)      | Median award, £ (IQR)         |
| MRC                                   | 768                                             | 17.9%               | £837,649,875          | 35.1%               | 1090690 (1770533)       | 504606 (305375-1153374)       |
| Charity (excluding Wellcome and CRUK) | 1,699                                           | 39.5%               | £415,189,093          | 17.4%               | 244372 (391813)         | 151912 (81000-223244)         |
| Department of Health                  | 586                                             | 13.6%               | £413,421,823          | 17.3%               | 705498 (2675223)        | 232173 (102391-471236)        |
| BBSRC                                 | 511                                             | 11.9%               | £223,651,002          | 9.4%                | 437673 (388793)         | 373356 (267848-501592)        |
| EPSRC                                 | 356                                             | 8.3%                | £201,861,623          | 8.5%                | 567027 (972696)         | 306906 (144056-604016)        |
| Wellcome                              | 193                                             | 4.5%                | £140,425,805          | 5.9%                | 727594 (1679370)        | 226761 (164547-427455)        |
| European Commission (inc ERC)         | 50                                              | 1.2%                | £78,757,447           | 3.3%                | 1575149 (731858)        | 1409678 (1252574-1830017)     |
| Other                                 | 136                                             | 3.2%                | £77,195,650           | 3.2%                | 567615 (1901202)        | 129944 (69309-263613)         |
| <b>Total</b>                          | <b>4299</b>                                     |                     | <b>£2,388,152,318</b> |                     | <b>555513 (1429510)</b> | <b>231559 (114619-487063)</b> |

**Table 5:** Compound ranking score for cancer research investment against 2013 global disease burdens, across mortality, YLDs, and DALYs, by cancer site.

| Disease      | Research investment (UK pound) by burden observed, 2013 |           |                             |                                |
|--------------|---------------------------------------------------------|-----------|-----------------------------|--------------------------------|
|              | Mean ranking across all burden metrics                  | Mortality | Years lived with disability | Disability-adjusted life years |
| Prostate     | 2.7                                                     | 2         | 4                           | 2                              |
| Ovarian      | 3.0                                                     | 4         | 2                           | 3                              |
| Mesothelioma | 4.0                                                     | 6         | 1                           | 5                              |
| Breast       | 4.0                                                     | 3         | 5                           | 4                              |
| Testicular   | 4.7                                                     | 1         | 3                           | 10                             |
| Skin         | 5.0                                                     | 5         | 9                           | 1                              |
| Colorectal   | 6.7                                                     | 7         | 7                           | 6                              |
| Renal        | 8.3                                                     | 8         | 10                          | 7                              |
| Cervical     | 9.7                                                     | 9         | 12                          | 8                              |
| Pancreatic   | 10.0                                                    | 12        | 6                           | 12                             |
| Brain        | 11.0                                                    | 11        | 11                          | 11                             |
| Thyroid      | 11.3                                                    | 10        | 15                          | 9                              |
| Liver        | 11.3                                                    | 13        | 8                           | 13                             |
| Lung         | 13.7                                                    | 14        | 13                          | 14                             |
| Upper GI     | 14.7                                                    | 15        | 14                          | 15                             |
| Bladder      | 16.0                                                    | 16        | 16                          | 16                             |

Supplementary Table 1: Investment per mortality observed for all site-specific cancers

|                          | Number of deaths |         |         | Investment per mortality observed |        |        |
|--------------------------|------------------|---------|---------|-----------------------------------|--------|--------|
|                          | 2005             | 2010    | 2013    | 2005                              | 2010   | 2013   |
| Bladder                  | 156385           | 170700  | 173900  | £0.03                             | £0.26  | £0.49  |
| Brain                    | 177191           | 195500  | 203900  | £0.00                             | £2.02  | £2.76  |
| Breast                   | 407108           | 438700  | 471000  | £5.35                             | £18.20 | £20.30 |
| Cervical                 | 221578           | 225400  | 235700  | £2.93                             | £5.63  | £4.50  |
| Colorectal               | 644648           | 714600  | 771000  | £3.54                             | £5.45  | £6.77  |
| Liver                    | 715141           | 752100  | 818000  | £0.04                             | £1.00  | £1.45  |
| Lung                     | 1391577          | 1527100 | 1639600 | £0.15                             | £0.57  | £1.08  |
| Mesothelioma             | 22128            | n/a     | 33700   | £0.81                             | ?      | £8.33  |
| Ovarian                  | 134354           | 160500  | 157800  | £23.00                            | £20.98 | £19.79 |
| Pancreatic               | 276753           | 310200  | 352400  | £0.56                             | £0.86  | £1.67  |
| Prostate                 | 225081           | 256000  | 292700  | £53.92                            | £45.19 | £34.22 |
| Renal                    | 113048           | 162100  | 133800  | £0.00                             | £2.27  | £5.96  |
| Skin                     | ?                | 79700   | 96100   | ?                                 | £14.20 | £16.30 |
| Testicular               | 7547             | 7700    | 8300    | £7.27                             | £44.69 | £55.14 |
| Thyroid                  | 29092            | 36000   | 33700   | £0.00                             | £1.70  | £3.14  |
| Upper GI and oesophageal | 1229320          | 1130100 | 1281200 | £0.93                             | £1.18  | £1.03  |

Supplementary Table 2: Investment per YLD observed for all site-specific cancers

|                          | YLD    |        |         | Investment per YLD observed |        |        |
|--------------------------|--------|--------|---------|-----------------------------|--------|--------|
|                          | 2005   | 2010   | 2013    | 2005                        | 2010   | 2013   |
| Bladder                  | 153647 | 125000 | 179800  | £0.05                       | £0.35  | £0.47  |
| Brain                    | 105126 | 94000  | 121900  | £0.00                       | £4.20  | £4.61  |
| Breast                   | 885550 | 898000 | 1068200 | £3.93                       | £8.89  | £8.95  |
| Cervical                 | 242359 | 111000 | 243800  | £4.28                       | £11.44 | £4.35  |
| Colorectal               | 561019 | 564000 | 701900  | £6.50                       | £6.91  | £7.44  |
| Liver                    | 160071 | 140000 | 190600  | £0.29                       | £5.39  | £6.24  |
| Lung                     | 388206 | 355000 | 467400  | £0.86                       | £2.44  | £3.78  |
| Mesothelioma             | 7109   | n/a    | 10800   | £4.04                       | ?      | £25.98 |
| Ovarian                  | 31339  | 63000  | 134900  | £157.75                     | £53.44 | £23.15 |
| Pancreatic               | 57317  | 37000  | 73600   | £4.35                       | £7.18  | £8.01  |
| Prostate                 | 690602 | 464000 | 893700  | £28.12                      | £24.93 | £11.21 |
| Renal                    | 112449 | 79000  | 139200  | £0.00                       | £4.66  | £5.72  |
| Skin                     | ?      | 300000 | 264100  | ?                           | £3.77  | £5.93  |
| Testicular               | 31339  | 12000  | 34300   | £2.80                       | £28.67 | £13.34 |
| Thyroid                  | 109078 | 48000  | 127600  | £0.00                       | £1.27  | £0.83  |
| Upper GI and oesophageal | 382757 | 304000 | 416100  | £4.77                       | £4.39  | £3.17  |

Supplementary Table 3: Investment per DALY observed for all site-specific cancers

|                          | Global DALYs |          |          | Investment per DALY observed |       |       |
|--------------------------|--------------|----------|----------|------------------------------|-------|-------|
|                          | 2005         | 2010     | 2013     | 2005                         | 2010  | 2013  |
| Bladder                  | 2987377      | 3015000  | 3139900  | £0.00                        | £0.01 | £0.03 |
| Brain                    | 6163358      | 6060000  | 6692200  | £0.00                        | £0.07 | £0.08 |
| Breast                   | 11762493     | 12018000 | 13258700 | £0.19                        | £0.66 | £0.72 |
| Cervical                 | 6775622      | 6440000  | 6914700  | £0.10                        | £0.20 | £0.15 |
| Colorectal               | 13747947     | 14422000 | 15794100 | £0.17                        | £0.27 | £0.33 |
| Liver                    | 19175329     | 19111000 | 20888700 | £0.00                        | £0.04 | £0.06 |
| Lung                     | 30791630     | 32405000 | 34732900 | £0.01                        | £0.03 | £0.05 |
| Mesothelioma             | 504037       | n/a      | 763500   | £0.04                        | ?     | £0.37 |
| Ovarian                  | 3541657      | 4118000  | 4056500  | £0.87                        | £0.82 | £0.77 |
| Pancreatic               | 5704661      | 6161000  | 7029100  | £0.03                        | £0.04 | £0.08 |
| Prostate                 | 3812057      | 3787000  | 4768800  | £3.18                        | £3.05 | £2.10 |
| Renal                    | 2810156      | 3676000  | 3150300  | £0.00                        | £0.10 | £0.25 |
| Skin                     | ?            | 1967000  | 237200   | ?                            | £0.58 | £6.61 |
| Testicular               | 354875       | 313000   | 3787700  | £0.15                        | £1.10 | £0.12 |
| Thyroid                  | 764526       | 836000   | 851900   | £0.00                        | £0.07 | £0.12 |
| Upper GI and oesophageal | 27964269     | 25356000 | 27749600 | £0.04                        | £0.05 | £0.05 |

Supplementary Figure 1: Investment per YLD (£/YLD) for 8 indicator site-specific cancers

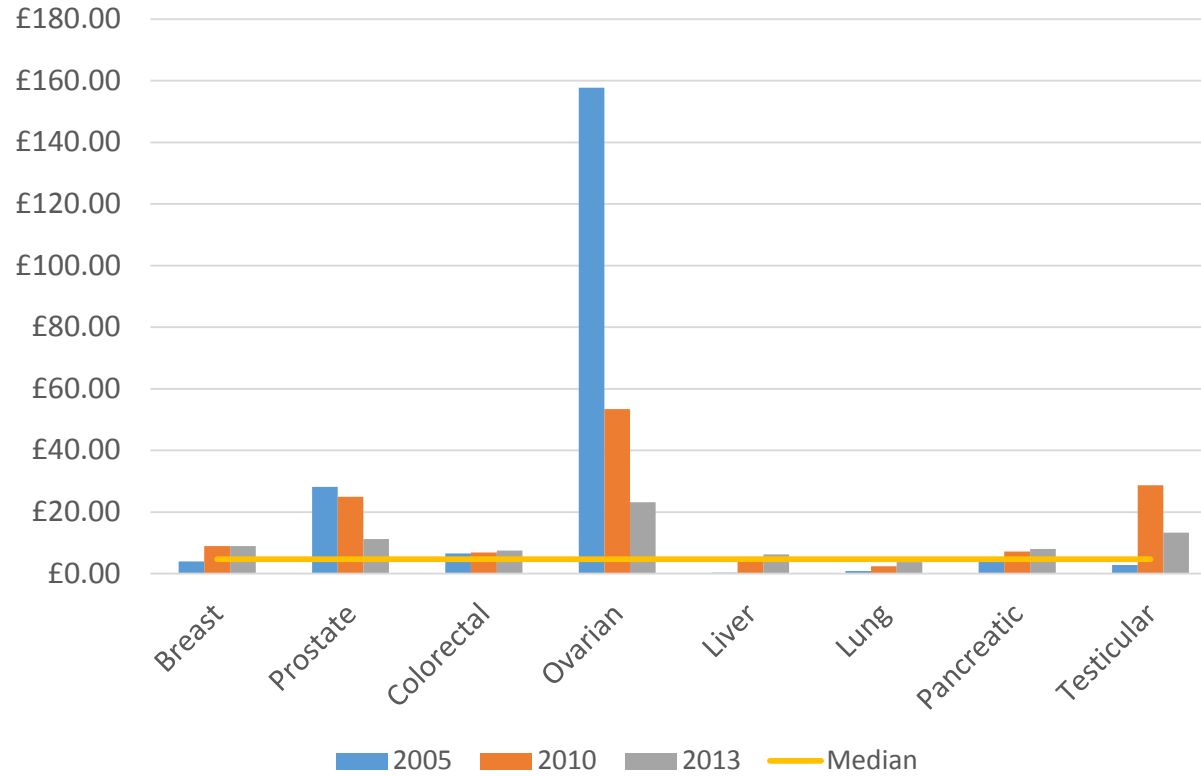

only

1  
2  
3  
4  
5  
6  
7  
8  
9  
10  
11  
12  
13  
14  
15  
16  
17  
18  
19  
20  
21  
22  
23  
24  
25  
26  
27  
28  
29  
30  
31  
32  
33  
34  
35  
36  
37  
38  
39  
40  
41  
42  
43  
44  
45  
46  
47

Supplementary Figure 1: Investment per death (£/death) for 8 indicator site-specific cancers

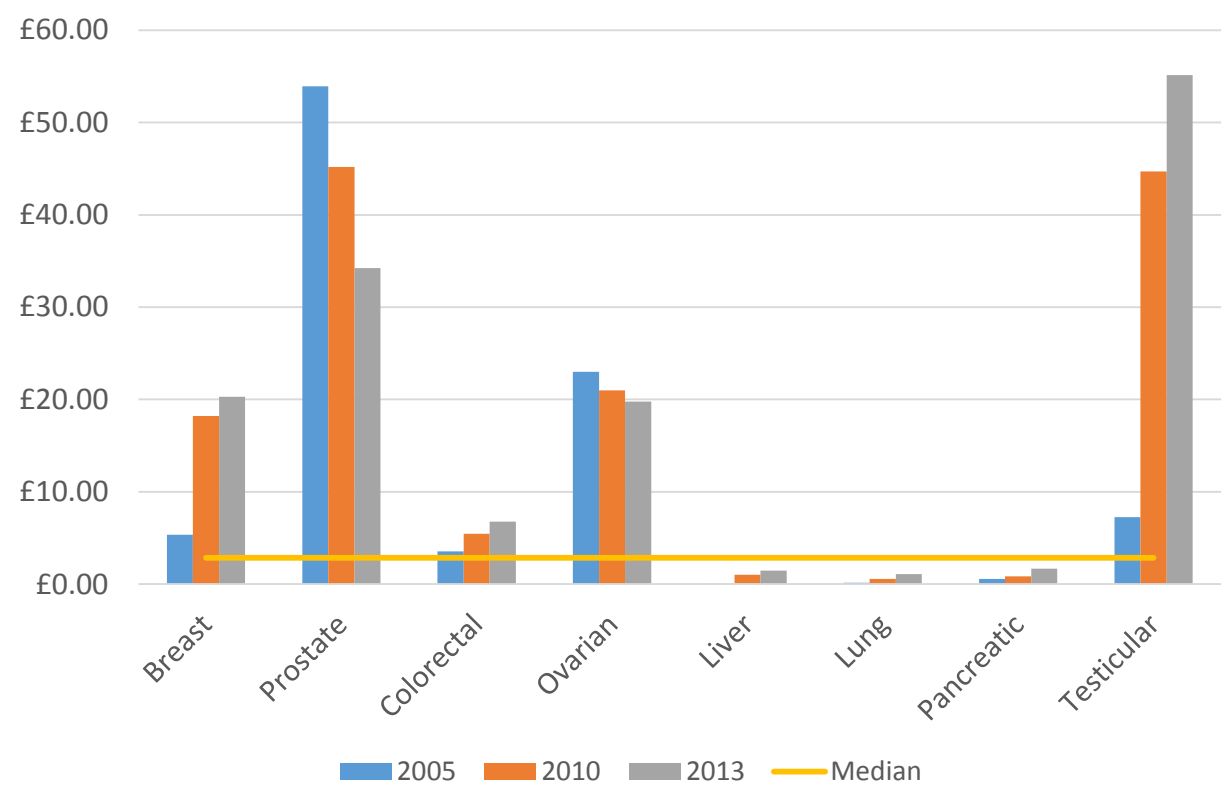

only



Supplementary Figure 1: Investment per DALY (£/DALY) for 8 indicator site-specific cancers

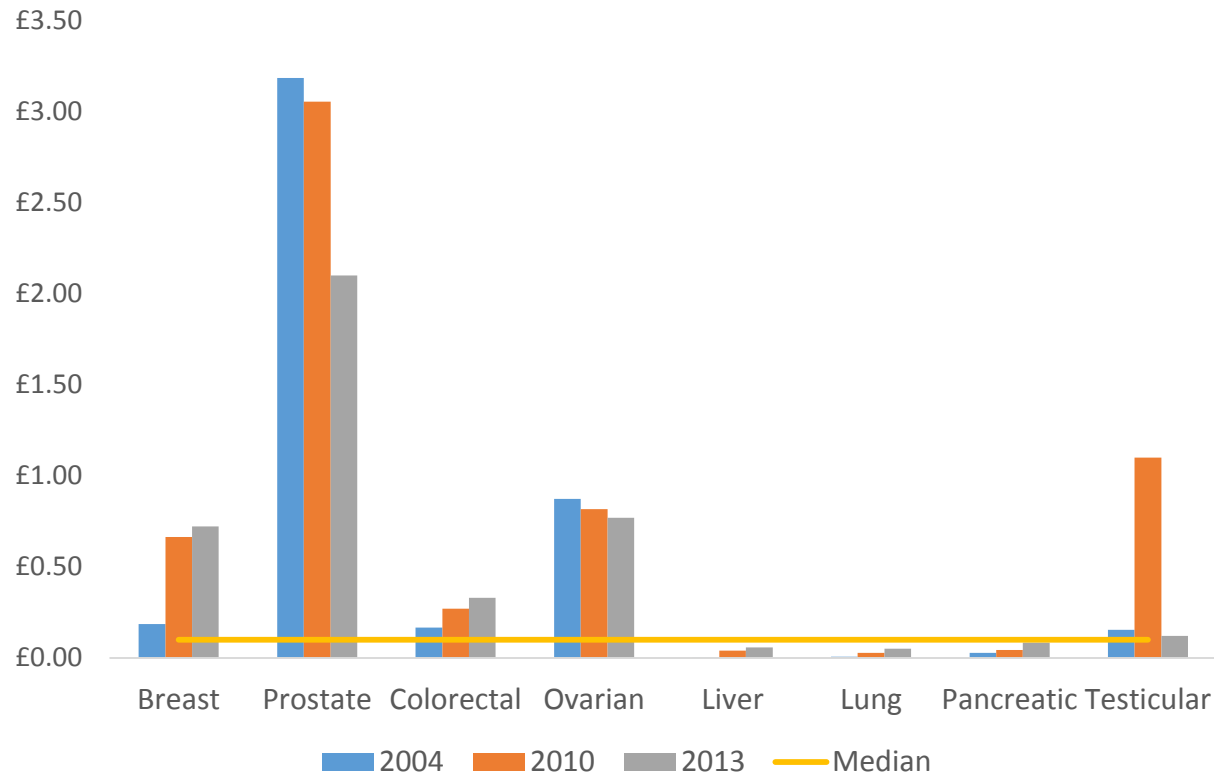

only

1  
2  
3  
4  
5  
6  
7  
8  
9  
10  
11  
12  
13  
14  
15  
16  
17  
18  
19  
20  
21  
22  
23  
24  
25  
26  
27  
28  
29  
30  
31  
32  
33  
34  
35  
36  
37  
38  
39  
40  
41  
42  
43  
44  
45  
46  
47

# BMJ Open

## Investments in cancer research awarded to UK institutions and the global burden of cancer 2000-2013: a systematic analysis

|                                 |                                                                                                                                                                                                                                                                                                                                       |
|---------------------------------|---------------------------------------------------------------------------------------------------------------------------------------------------------------------------------------------------------------------------------------------------------------------------------------------------------------------------------------|
| Journal:                        | <i>BMJ Open</i>                                                                                                                                                                                                                                                                                                                       |
| Manuscript ID                   | bmjopen-2016-013936.R2                                                                                                                                                                                                                                                                                                                |
| Article Type:                   | Research                                                                                                                                                                                                                                                                                                                              |
| Date Submitted by the Author:   | 06-Dec-2016                                                                                                                                                                                                                                                                                                                           |
| Complete List of Authors:       | Maruthappu, Mahiben<br>Head, Michael; University College London, Infection & Population Health<br>Zhou, Charlie; University of Oxford,<br>Gilbert, Barnabas<br>El-Harasis, Majd<br>Raine, Rosalind<br>Fitchett, Joseph; King's College London, School of Medicine<br>Atun, Rifat; Harvard University, Harvard School of Public Health |
| <b>Primary Subject Heading</b>: | Health policy                                                                                                                                                                                                                                                                                                                         |
| Secondary Subject Heading:      | Global health, Health economics, Oncology, Public health                                                                                                                                                                                                                                                                              |
| Keywords:                       | ONCOLOGY, research investment, global burden of disease, global health, funding, research and development                                                                                                                                                                                                                             |
|                                 |                                                                                                                                                                                                                                                                                                                                       |

SCHOLARONE™  
Manuscripts

Only

1  
2  
3 **Investments in cancer research awarded to UK institutions and the global burden of cancer 2000-**  
4 **2013: a systematic analysis**

5  
6 Mahiben Maruthappu<sup>a,\*</sup> Michael G Head<sup>b,\*</sup> Charlie Da Zhou<sup>c</sup>, Barnabas J Gilbert<sup>d</sup>, Majd A El-Harasis<sup>e</sup>,  
7 Rosalind Raine<sup>f</sup>, Joseph R Fitchett<sup>g</sup>, Rifat Atun<sup>g</sup>  
8

9 a Public Health Specialty Registrar, Epidemiology and Public Health, University College London, 1-19  
10 Torrington Place, London, WC1E 6BT, UK  
11

12 b Senior Research Fellow, Global Health Research Institute, Institute for Life Sciences, Faculty of  
13 Medicine, University of Southampton, Southampton, SO17 1BJ, UK  
14

15 c Doctor, Medical Sciences Division, University of Oxford, Oxford OX1 2JD, UK  
16

17 d Doctor, Harvard University, Cambridge, MA 02138, USA.  
18

19 e Doctor, Faculty of Medicine, Imperial College London, London, SW7 2AZ, UK.  
20

21 f Professor, Department of Applied Health Research, UCL, London, WC1E 7HB  
22

23 g Professor, Harvard T. H. Chan School of Public Health, Harvard University, Boston, MA 02115, USA  
24

25  
26 \* Authors Maruthappu and Head to be recognised as joint first-author  
27  
28

29 **Corresponding author**

30 Charlie Zhou  
31

32 [chazhou@gmail.com](mailto:chazhou@gmail.com)  
33

34 New College, Holywell Street, Oxford, OX1 3BN, UK  
35  
36

37 **Short title**

38 UK investments in oncology research  
39

40 **Word count**

41 4178  
42

43 **Number of references**

44 31  
45  
46

47 **Keywords**

48 cancer; oncology; research investment; global burden of disease; global health; funding; research  
49 and development  
50  
51  
52  
53  
54  
55  
56  
57  
58  
59  
60

## ABSTRACT

### Objectives

We sought to systematically categorise cancer research investment awarded to UK institutions in the period 2000-2013 and to estimate research investment relative to disease burden as measured by mortality, disability-adjusted life years (DALYs), and years lived with disability (YLDs).

### Design

Systematic analysis of all open access data.

### Setting and participants

Public and philanthropic funding to all UK cancer research institutions, 2000-2013

### Main outcome measures

Number and financial value of cancer research investment reported in 2013 UK pounds. Mortality, DALYs and YLDs data was acquired from the Global Burden of Diseases Study. A compound metric was adapted to estimate research investment relative to disease burden as measured by mortality, DALYs, and YLDs.

### Results

We identified 4,299 funded studies with a total research investment of UK£2.4 billion. The highest funding by sites were haematological, breast, prostate, colorectal, and ovarian cancers. Relative to disease burden as determined by a compound metric combining mortality, DALYs and YLDs, gender-specific cancers were found to be highest funded - the five sites that received the most funding were prostate, ovarian, breast, mesothelioma, and testicular cancer; the least well-funded sites were liver, thyroid, lung, upper GI and bladder. Pre-clinical science accounted for 66.2% of award numbers and 62.2% of all funding. The top five areas of primary research focus by funding were pathogenesis, drug therapy, diagnostic, screening and monitoring, women's health, and immunology. The largest

1  
2  
3 individual funder was the Medical Research Council. In combination, the five lowest funded site  
4  
5 specific cancers relative to disease burden account for 47.9%, 44.3% and 20.4% of worldwide cancer  
6  
7 mortality, DALYs and YLDs.  
8  
9

## 10 **Conclusions**

11  
12 The cancer sites which we identify as receiving higher levels of funding relative to disease burden are  
13  
14 broadly consistent with those reported in previous studies. Funding agencies and industry need to  
15  
16 openly document their research investment to enable the development of transparent and objective  
17  
18 methods to allocate funding.  
19  
20

## 21 **Strengths and limitations of this study:**

- 22  
23
- 24 • We systematically analyse UK investment in cancer research and describe trends by cancer  
25 site and type of science along the research pipeline.
  - 26 • We consider cancer research investments alongside the global burden of disease to provide  
27 pragmatic commentary about areas of UK research strength and relative neglect to inform  
28 funder strategy and contribute towards policy discussions.
  - 29 • Our study is dependent on the accuracy of original investment data from the funding bodies
  - 30 • We could not openly access data of private sector research funding, nor were we able to  
31 obtain disaggregated award data from CRUK, which impedes discussion around the equity of  
32 investment decisions.
  - 33 • Disease burden measures are typically an estimate and are subject to the potential  
34 introduction of bias; other variable influence funding decisions beyond the burden of  
35 disease.  
36  
37  
38  
39  
40  
41  
42  
43  
44  
45  
46  
47  
48  
49  
50  
51  
52  
53  
54  
55  
56  
57  
58  
59  
60

## Introduction

Cancers account for a high burden of morbidity and mortality worldwide. The Global Burden of Disease (GBD) Study estimates that cancer of all types resulted in 8,235,700 deaths in 2013[1]. Being predominantly a disease of older age, prevalence of cancers has historically fallen among high-income countries. However as low-income countries experience economic maturation, we are seeing an expanded distribution of this disease burden. Further deaths from cancer are projected due to global population growth and ageing[2,3]. Between 1990 and 2013, the proportion of all deaths that was attributable to cancer rose from 11.9% to 15.0%, largely among low- and middle-income countries and site-specific cancers accounted for 9 of the 50 leading causes of death, worldwide[1].

The socioeconomic impact of cancer, both in terms of direct costs involved in medical management as well as indirect costs resulting from productivity loss, on patients and caregivers are substantial. Direct health-related costs of cancer have been estimated to incur €51.0 billion within in the European Union[4] and \$124.5 billion in the United States[5]. Indirect costs are estimated to account for additional losses of €75.2 billion and \$115.8 billion, respectively. Economic evaluation of the impact of cancer outside of these two geographical regions has been lacking.

Investment in research and development (R&D) for cancers produces global public benefits that have a positive effect both locally and worldwide, irrespective of the site of the work or the location of the institution receiving an award, bringing substantial health, social, and economic benefit.

There are several national and international funding bodies that make cancer research investments along the R&D pipeline, from population health research, pre-clinical studies through to clinical trials and applied research. The UK remains one of the world's leading investors and producers of global biomedical and health research. Previous analyses by the Research Investments in Global Health study (ResIn, [www.researchinvestments.org](http://www.researchinvestments.org)) has systematically analysed public and philanthropic

1  
2  
3 awards totalling £3.7 billion to UK institutions for infectious disease from 1997 to 2013, and  
4  
5 evaluated funding against global disease burden[6,7] and publications and citations as a marker of  
6  
7 research output[8]. Tracking investments in R&D provides information and evidence to inform  
8  
9 funding decisions and priority setting. Here, we present a systematic analysis of cancer-related  
10  
11 research awarded by public and philanthropic funders to UK institutions from 2000 to 2013,  
12  
13 categorise the data against a range of cancer-specific and cross-cutting disease areas, and assess the  
14  
15 award data against global measures of mortality, disability-adjusted life years (DALYs), and years  
16  
17 lived with disability (YLD) across three time points and in the wider literature.  
18  
19

## 20 21 **Methods**

22  
23 Our methods build on those developed for the infectious disease research investment analysis,  
24  
25 which are described in detail elsewhere[6,7] and adapted in subsequent peer-reviewed publications  
26  
27 ([www.researchinvestments.org/publications](http://www.researchinvestments.org/publications)).  
28  
29

30  
31 We systematically examined funding awards from a number of public and philanthropic funding  
32  
33 bodies (including the Medical Research Council, Department of Health, Biotechnology and Biological  
34  
35 Sciences Research Council, Engineering and Physical Science Research Council, Wellcome Trust,  
36  
37 European Commission, as well as 9 members of the Association of Medical Research Charities)  
38  
39 between 2000 and 2013. Information was obtained by downloading openly-accessible information  
40  
41 on the funder website, contacting the funder to request the information, or searching existing  
42  
43 funding databases. For each award, the title and abstract, where available, were individually  
44  
45 screened for relevance to cancer research. We excluded awards that were i) not obviously or  
46  
47 immediately relevant to oncology; ii) led by a non-UK institution; iii) not considered to be for R&D  
48  
49 activity. Studies that were completed without funding were also excluded. Private sector data were  
50  
51 not available to evaluate at the same level of detail as public and philanthropic research award data,  
52  
53 and were therefore excluded from this analysis.  
54  
55  
56  
57  
58  
59  
60

1  
2  
3 Cancer Research UK (CRUK) would not provide their funding data at individual award level and so  
4  
5 could not be included in the main analysis. There is some description of individual CRUK awards  
6  
7 without grant amounts available at <https://europepmc.org/>. We report total number of studies in  
8  
9 this analysis.  
10

11  
12 Where awards were described in currencies other than UK pounds, these were converted to UK  
13  
14 pounds using the mean exchange rate in the year of the award. All included awards were adjusted  
15  
16 for inflation and reported in 2013 UK pounds.  
17

18  
19 Each study in the dataset was reviewed by one author (either CDZ, GJG, MAE-H, MGH) and assigned  
20  
21 to as many of 14 cross-cutting categories as appropriate. The 14 association categories were  
22  
23 paediatric, geriatric, infection-associated, women's health, men's health, occupational health,  
24  
25 pathogenesis, diagnostic/screening/monitoring, drug therapy, radiotherapy, surgery, immunology,  
26  
27 psychosocial and global health. Awards were defined as global health if they were considered to  
28  
29 pursue a clear non-UK focus (e.g. 'thyroid cancer in Kenya'). The other category was only used when  
30  
31 none of the aforementioned categories were deemed to be appropriate. Studies were also allocated  
32  
33 to one of five categories along the R&D pipeline: pre-clinical; phase I, II, or III clinical trials; product  
34  
35 development (including phase IV activity); public health; and cross-disciplinary research. The cross-  
36  
37 disciplinary category was defined as an award containing significant components across two distinct  
38  
39 areas along the R&D pipeline (such as pre-clinical research leading directly into a phase I trial).  
40  
41 Provisional datasets were circulated to all authors for review and comment with checks by second  
42  
43 authors on sections of the data and any disagreements settled by consensus. Final datasets were  
44  
45 then again circulated for further review by all authors. Microsoft Excel 2010 and 2013 and Stata  
46  
47 (V13) software were used for data analysis.  
48  
49  
50

51  
52 Global data on mortality, disability-adjusted life years (DALYs) and years lived with disability (YLDs)  
53  
54 were available at time points 2005, 2010 and 2013. All burden data were sourced from the findings  
55  
56 of the Global Burden of Disease (GBD) study, for 2013[1,9,10] and for 2010[11,12]. Burden data from  
57  
58  
59  
60



2005 were obtained directly from colleagues at the Institute for Health Metrics and Evaluation, USA.

As defined by the GBD study, YLDs for a disease or injury are the sum of the YLDs for each sequela associated with the disease or injury[10]. DALYS are the sum of YLLs and YLDs for each age–sex–country group[9].

In order to allow direct comparison of relative investment with global health metrics across disease areas and between different time periods, metrics were adapted from the infectious disease analyses to estimate the ‘investment per mortality/DALY/YLD observed [7]’. The metrics were created using the following equation –

$$\left( \frac{\text{Total research investment up to the year before the time point} / \text{number of deaths, DALYs or YLD at time point}}{\text{number of years of investment included}} \right)$$

For example, for assessment of breast cancer mortality at the 2013 time point, we took the sum of breast cancer research investment 2000-2012 (£124,305,716) and divided that by number of deaths reported in 2013 (471000), and divided the result by the number of years of investment included (13) to get an ‘investment per mortality observed’ metric of £20.30.

These metrics were applied for research relating to 16 site-specific cancers, where there was comparable data in both the ResIn and GBD studies. We defined lung cancer by aggregating ‘tracheal, bronchus and lung cancer’ burden data from the GBD study. Similarly, we defined skin cancer by aggregating ‘malignant skin melanoma’ and ‘non-malignant skin cancer’, and we defined upper gastrointestinal (GI) cancer by aggregating ‘oesophageal’ and ‘stomach cancer’. The use of total investment and the division by number of years included aimed to reduce the impact of the volatility of annual research funding and the relatively short periods between time points. Ranking scores of the investment metrics were developed for the 16 sites of cancer against 2013 burdens. Cancers were ranked in order of relative investment against burden from high to low and assigned a score (from 1 to 16). The mean ranking scores across mortality, DALYs and YLDs were used to illustrate an overall relative level of investment against 2013 global disease burden.

1  
2  
3 **Patient involvement**  
4

5  
6 There was no patient involvement in this study.  
7  
8  
9  
10  
11  
12  
13  
14  
15  
16  
17  
18  
19  
20  
21  
22  
23  
24  
25  
26  
27  
28  
29  
30  
31  
32  
33  
34  
35  
36  
37  
38  
39  
40  
41  
42  
43  
44  
45  
46  
47  
48  
49  
50  
51  
52  
53  
54  
55  
56  
57  
58  
59  
60

For peer review only

## Results

We identified 4,299 funded studies that met our inclusion criteria (Table 1). The funding for these studies represented a total research investment of almost £2.4 billion. The mean award amount for each study was £555,513 (standard deviation (SD) £1,429,510) and median was £231,559 (inter-quartile range £114,619 – 487,063). 2,416 awards (56.2% of total) were designated towards a named site-specific cancer (Table 1), equating to £1.0 billion (40.3% of total). The top five cancer sites in terms of award number were haematological, breast, colorectal, prostate, and skin; the bottom five were testicular, bone, bladder, thyroid, and cholangiocarcinoma (Table 1). The top five cancer sites in terms of total funding were haematological, breast, prostate, colorectal and ovarian; the bottom five were testicular, mesothelioma, thyroid, bladder and chlangiocarinoma. Mean funding per award varied greatly between sites with prostate cancer receiving the most (£1.47 million) and bladder cancer the least (£117,385).

The top five areas of primary research focus, by number of awards, were drug therapy, diagnostic, screening and monitoring, women's health, immunology, and pathogenesis; the bottom five areas were men's health, surgery, occupational health, global health and geriatrics (Table 2). In terms of net funding, the top five areas of research were pathogenesis, drug therapy, diagnostic, screening and monitoring, women's health, and immunology; the bottom five were surgery, psychosocial, global health, occupational health, and geriatrics.

The majority of awards were focused on pre-clinical science, accounting for 66.2% of award numbers and 62.2% of all funding (Table 3). In terms of award number, this was followed by public health, cross-disciplinary, phase I-III, and product development. This order was reflected in terms of net investment, although cross-disciplinary studies ranked ahead of public health studies. Phase I-III clinical trials received the highest mean funding per award, at £736,172 (SD £3,361,312), whilst public health research received the least, at £496,744 (SD £1,000,757).

1  
2  
3 The largest individual funder of cancer research of the studies identified was the Medical Research  
4 Council, accounting for 35.1% of all funding (Table 4). The charitable sector was responsible for  
5 39.5% of all awards (excluding CRUK) but 17.4% of funding. The European Commission was  
6 responsible for the largest mean grant per award (£1.58 million).  
7  
8  
9

10  
11 We generated a compound ranking score for the 16 sites of cancer against 2013 global disease  
12 burdens, across mortality, DALYs, and YLDs (table 5). The amount of investment per unit disease  
13 burden (£ per death/DALY/YLD) were used to compile this compound ranking score. The data for all  
14 site-specific cancers measured here are presented in the supplementary information (Supplemental  
15 Tables 1-3, Supplemental Figures 1-3). We identified the five sites that received the most funding  
16 relative to disease burden as prostate, ovarian, breast, mesothelioma and testicular cancer. The  
17 least well-funded sites relative to disease burden were cancers of the liver, thyroid, lung, upper GI,  
18 and bladder.  
19  
20  
21  
22  
23  
24  
25  
26  
27  
28  
29

30 We were able to obtain some disaggregated data for 3,284 CRUK research grants during the period  
31 of interest but this excluded individual award data. Compared to the aggregation of all other  
32 funders, CRUK placed more of a focus on funding towards cancers of the prostate, ovary and liver –  
33 by study number these sites accounted for 6.9%, 3.4% and 2.7% of CRUK funded studies compared  
34 to 2.1%, 1.1% and 0.9% of all studies in our quantitative database, respectively. CRUK preferentially  
35 funded research investigating pathogenesis, which accounted for 51.0% of all grants awarded. In  
36 comparison, only 5.3% of all awards in our quantitative database were identified as primarily  
37 focused on pathogenesis.  
38  
39  
40  
41  
42  
43  
44  
45  
46  
47

## 48 Discussion

49  
50 We identified 4,299 funded studies, with a total research investment of £2.4 billion. We performed  
51 qualitative analysis on a further 3,284 CRUK funded awards. The vast majority of all awards awarded  
52 were investigating at least one of pathogenesis, diagnosis, monitoring and screening and drug  
53 therapy. In the absence of CRUK data, the Medical Research Council and the Department of Health  
54  
55  
56  
57  
58  
59  
60

1  
2  
3 were the two leading funding sources. Preclinical research accounted for £1.5 billion (62.2%) of total  
4  
5 R&D investment. Four of the five highest funded cancer sites relative to global disease burden were  
6  
7 gender-specific – namely prostate, ovarian, breast, and testicular cancers. Cancer research with a  
8  
9 clear focus on women’s health accounted for 640 studies (14.9%) and £199.5 million (8.4%) of  
10  
11 investment. In comparison, 111 studies (2.6%) and £143.3 million (6.0%) of investment had a clear  
12  
13 link with men’s health. This may reflect the successes of various institutions and charities that have  
14  
15 sought to increase awareness of these sex-specific cancers. Breast cancer, the most commonly  
16  
17 diagnosed cancer in the UK and the leading cause of cancer death in women, and prostate cancer,  
18  
19 the second most frequently diagnosed cancer and the sixth leading cause of cancer death among  
20  
21 men, were found to be relatively well funded[1,13].  
22  
23

24  
25 We highlight several cancer sites where there might be underinvestment, namely that of liver,  
26  
27 thyroid, lung, upper GI tract, and bladder. In our analysis cancer of the upper GI tract combines  
28  
29 oesophageal and stomach cancer. These site-specific cancers identified to be relatively underfunded  
30  
31 account for a substantial proportion of global cancer burden. Globally, these sites account for 47.9%,  
32  
33 44.3% and 20.4% of the global mortality[1], DALYs[9] and YLDs[10] of all cancers, respectively. The  
34  
35 disparity between YLDs and DALYs demonstrates the poor prognosis and high mortality of these  
36  
37 particular sites when compared against all neoplastic disease. Lung, liver, stomach and oesophagus  
38  
39 are the first, second, third and fifth, leading sites of neoplastic mortality worldwide[1].  
40  
41

42  
43 Two previous studies have compared UK cancer funding with years of life lost (YLLs). Burnett et al  
44  
45 [14] reported the relative over-funding of breast cancers and leukaemia. Carter et al [15,16] likewise  
46  
47 reported higher levels of funding than their burden suggests of testicular, leukaemia, Hodgkin’s  
48  
49 lymphoma, breast, cervical, ovarian, prostate cancer with relative underfunding of gallbladder, lung,  
50  
51 nasopharyngeal, intestine, stomach, pancreatic, thyroid, oesophageal, liver, kidney, bladder, and  
52  
53 brain/central nervous system. Furthermore, they show that these broad discrepancies between  
54  
55 cancer burden and research investment are also reflected in US data. Over the past decade in the  
56  
57  
58  
59  
60

1  
2  
3 UK, there has generally been a transition of increased funding towards previously underfunded  
4  
5 cancers with one notable exception being breast cancer. Although our site-specific classifications  
6  
7 differed slightly, our findings are broadly consistent with these previous studies with the  
8  
9 identification of haematological and sex-specific cancers being relatively well-funded. We are unable  
10  
11 to account exactly for the slight differences in our findings (such as cervical and colorectal cancers);  
12  
13 however, they are likely due to our metrics which seek to capture mortality (global mortality and  
14  
15 DALYs) and life burden (DALYs and YLDs) rather than just mortality, and also different included  
16  
17 components in the respective datasets.  
18  
19

20  
21 With regard to interventions research, there is heavy investment in drug-based modalities. £620.9  
22  
23 million (26.0%) was invested in novel drug therapies and £194.1 million (8.1%) was invested in the  
24  
25 emergent role of immunomodulation. In comparison, funding towards radiotherapy and surgical  
26  
27 interventions accounted for £88.2 million (3.7%) and £37.9 million (1.6%), respectively. In high-  
28  
29 income settings, around half of new cancer diagnoses will undergo a course of radiotherapy  
30  
31 treatment during their clinical management; roughly a quarter will receive two or more  
32  
33 courses[17,18]. Globally, over 80% of cancer cases will warrant surgical intervention, where it has  
34  
35 preventative, diagnostic, curative, supportive, palliative, and reconstructive roles[19].  
36  
37

38  
39 Analysis by R&D pipeline showed that research investment in the UK places a heavy emphasis on  
40  
41 pre-clinical research, but relatively little investment towards phase I-III clinical trials or product  
42  
43 development, and this is line with previous research in infectious disease investment[6]. This may  
44  
45 reflect the strengths of UK institutions in preclinical science, but also could suggest a need to  
46  
47 strengthen research capacity further down the R&D chain. It would be useful to determine whether  
48  
49 investment reflects the priorities of funding agencies and whether this is comparable to research  
50  
51 investment in other countries. We noted a lack of readily available data from the pharmaceutical  
52  
53 industry and this is likely to leave a data gap in particular for sum totals of investment in clinical trials  
54  
55 of pharmaceutical products.  
56  
57  
58  
59  
60

1  
2  
3 Our findings contribute to the development of transparent and objective methods to couple the  
4 allocation of limited research funds with disease burden. Previous studies have suggested that  
5 financial investment might appropriately be coupled with DALYs as a measure of burden[20–23]. In  
6 recent years, whilst net UK governmental and charitable cancer investment has increased [24], there  
7 has been a proportional reduction compared to that of total funding towards cancer, coronary heart  
8 disease, dementia and stroke – in keeping with the health and social care costs attributable to each  
9 disease [25]. Furthermore, previous UK research suggests that publicly funded research offers  
10 substantial rates of return in terms of both health and monetary benefit both in the case of cancer  
11 specifically [24] and biomedical sciences as a whole [26]. We have further sought to incorporate  
12 mortality rates and YLDs into the consideration of cancer research investment. These analyses, when  
13 considered together, provide convincing pragmatic evidence of UK research strength and types of  
14 cancer where research investment has been particularly lacking.

15  
16  
17  
18  
19  
20  
21  
22  
23  
24  
25  
26  
27  
28  
29  
30 We have chosen to compare cancer research funding to global rather than domestic UK disease  
31 burden. Due to increasing globalization, the emergence of non-communicable disease burden in  
32 resource poor settings, the internationalization of healthcare, the flow of people across national  
33 borders and the role of the UK as an international centre of biomedical research, we believe this  
34 approach to be justified.

35  
36  
37  
38  
39  
40  
41  
42  
43  
44  
45  
46  
47  
48  
49  
50  
51  
52  
53  
54  
55  
56  
57  
58  
59  
60  
However, defining an appropriate amount of research investment for each site specific cancer is  
challenging since cancers of similar disease burdens may warrant different levels of investment to  
develop cost-effective interventions. Decisions may be influenced by any of a number of factors, for  
example due to exceptional need, as may be the case in mesothelioma, or due to public awareness  
and third-party lobbying, as may be the case with regards to the gender-specific cancers.

A variety of factors contribute towards the difficulty in tracking net cancer research investment  
within the UK. Fragmentation of data from a large number of diverse public and private sources of  
funding, poorly designed donor accounting structures and the paucity of disaggregated information

1  
2  
3 from the private sector limit the quality of the evidence base and thus the ability to inform policy in  
4  
5 real-time. In our study, we were unable to obtain disaggregated investment data from CRUK. Despite  
6  
7 requests across 2014 and 2015, CRUK refused to make available disaggregated investment data. This  
8  
9 is in spite CRUK policy and representatives seemingly welcoming and encouraging the expansion of  
10  
11 data-sharing and promoting the availability, accessibility and discoverability of such data [27,28]. In  
12  
13 our experience across the ResIn infection and cancer analyses, this reluctance to be transparent is  
14  
15 unique amongst more than 200 high-profile research funders in the UK and USA [29]. The lack of  
16  
17 data liberation across non-communicable diseases impedes open scrutiny and hinders timely and  
18  
19 effective response to this growing global disease burden [29,30]. Transparency in the tracking and  
20  
21 monitoring of cancer research financing is essential to enable accountability and equity in resource  
22  
23 allocation and to facilitate further future research in this area. We would encourage CRUK to be  
24  
25 more open in providing data on funding.  
26  
27

28  
29 In this study we systematically analyse UK investment in cancer research and identify areas of  
30  
31 relative neglect. Although the competitive application process used by most funders to allocate  
32  
33 research grants ensure a portfolio of high quality, the absence of explicit resource allocation criteria  
34  
35 could contribute towards inequalities in R&D by disease burden. Funding agencies will have  
36  
37 particular areas of focus, and UK funders may have considered the focus of international agencies in  
38  
39 their own research strategies. As a result, international data is essential to complete the mapping of  
40  
41 cancer research investment. Nevertheless, our findings will inform funders and contribute towards  
42  
43 policy discussions that reduce inequities in the allocation of limited financial resources.  
44  
45

46  
47 By demonstrating the relationship between disease burden and research funding, we enable the  
48  
49 identification of potential investment gaps. However, it is not possible to fully equate gaps in funding  
50  
51 with areas of neglect without consideration of other influences such as the feasibility of research,  
52  
53 costs of technologies, infrastructure and skill requirements, political and social considerations, and  
54  
55 the accuracy of disease burden estimates.  
56  
57  
58  
59  
60



1  
2  
3 There are several potential limitations to our study. We are dependent on the accuracy of original  
4 investment data as sourced from the funding bodies. Although checks were made on any obvious  
5 discrepancies or errors, interpretation of these original data may contain errors. We made no  
6 attempt to investigate the contribution of any indirect or estate costs. Currency conversions were  
7 averaged across each financial year and any intra-year fluctuations may not have been captured.  
8 Unless clearly documented, we were unable to assess how funding was distributed from lead  
9 institutions to collaborative partners. We considered individual awards, rather than number of  
10 studies.

11  
12 Furthermore, assignment of disease categories and allocation of studies according to these  
13 categories is subjective, and there might be disagreements regarding certain inclusion criteria. As  
14 YLLs were not included in our analysis, we may underrepresent the disease burden of cancers that  
15 occur disproportionately in the young and which are associated with poor survival, notably cancers  
16 of the ovary, cervix and CNS [14]. However, we would expect any additional information offered by  
17 YLL analysis to be predominantly captured by use of DALYs.

18  
19 We could not openly access data of private sector research funding, nor were we able to obtain  
20 disaggregated award data from CRUK. Whilst our analysis did demonstrate that CRUK funding (with  
21 some exceptions) broadly reflected the findings of our quantitative database, it is likely that  
22 substantial awards towards particular areas of research could skew results; for example, CRUK are  
23 particularly keen to fund clinical trials, an area typically not covered to such an extent by other  
24 public and philanthropic funders. In 2014/15 CRUK invested £394 million into research or research-  
25 related activity, and we hypothesise that much of that would have met our inclusion criteria for this  
26 analysis [31]. Disease burden measures are typically an estimate and are subject to the potential  
27 introduction of bias from missing or unobtainable data as well as from differences in classification  
28 and diagnosis.

1  
2  
3 Our report presents the latest investment data on cancer research awarded to UK institution  
4  
5 between 2000 and 2013. Cancers of the liver, thyroid, lung, upper GI tract, and bladder as well as  
6  
7 research towards radiotherapy and surgical techniques in particular may warrant increased rates of  
8  
9 investment. We will make the entire database and associated figures available online  
10  
11 ([www.researchinvestment.org](http://www.researchinvestment.org)) to assist policy makers, funding organisations, and researchers in the  
12  
13 identification of investment gaps. We further encourage funding organisations to make their  
14  
15 investment portfolios openly accessible to facilitate future research.  
16

17  
18 We hope that open funding data in this area can contribute to redressing the misalignments in  
19  
20 investments for cancer research. Cancer research can improve the clinical course of disease and  
21  
22 offer tangible improvements in health outcomes[24]. Access to open data across all funders,  
23  
24 including CRUK is essential and transparency can assist policy makers and the scientific community in  
25  
26 ensuring that limited resources are allocated appropriately and thus most effectively alleviate the  
27  
28 extensive mortality and morbidity associated with cancer.  
29  
30  
31  
32  
33  
34  
35  
36  
37  
38  
39  
40  
41  
42  
43  
44  
45  
46  
47  
48  
49  
50  
51  
52  
53  
54  
55  
56  
57  
58  
59  
60

**Contributions**

MM and MGH are the guarantors of this study. MM, MGH, JRF and RA conceived and designed the study. MGH, CDZ, BJG and MAE-H obtained the data. MM and MGH conducted data formatting and statistical analysis. All authors helped interpret the findings. MM, MGH and CDZ wrote the first draft of the manuscript with input from RR, JRF and RA; all authors provided input to subsequent drafts. All authors had full access to all of the data in the study and take responsibility for its integrity and the accuracy of data analysis.

**Transparency declaration**

MM affirms that the manuscript is an honest, accurate, and transparent account of the study being reported; that no important aspects of the study have been omitted; and that any discrepancies from the study as planned (and, if relevant, registered) have been explained.

**Funding**

No funding was received for this study

**Competing interests**

Rosalind Raine is supported by the National Institute for Health Research (NIHR) Collaboration for Leadership in Applied Health Research and Care (CLAHRC) North Thames at Bart's Health NHS Trust. The views expressed are those of the author(s) and not necessarily those of the NHS, the NIHR or the Department of Health. All other authors declare no support from any organisation for the submitted work; no financial relationships with any organisations that might have an interest in the submitted work in the previous three years; no other relationships or activities that could appear to have influenced the submitted work.

**Ethical approval**

Not required

**Data sharing**

All data used is publicly available. Entire database and associated figures are permanently available with open access online ([www.researchinvestment.org](http://www.researchinvestment.org)) to assist policy makers, funding organisations, and researchers.

For peer review only

## References

- 1 Naghavi M, Wang H, Lozano R, *et al*. Global, regional, and national age-sex specific all-cause and cause-specific mortality for 240 causes of death, 1990-2013: A systematic analysis for the Global Burden of Disease Study 2013. *Lancet* 2015;**385**:117–71.
- 2 Jemal A, Bray F, Center MM, *et al*. Global Cancer Statistics: 2011. *CA Cancer J Clin* 2011;**61**:69–90.<http://www.ncbi.nlm.nih.gov/pubmed/21296855>
- 3 Torre LA, Bray F, Siegel RL, *et al*. Global Cancer Statistics, 2012. *CA a cancer J Clin* 2015;**65**:87–108.<http://onlinelibrary.wiley.com/doi/10.3322/caac.21262/abstract>
- 4 Luengo-Fernandez R, Leal J, Gray A, *et al*. Economic burden of cancer across the European Union: a population-based cost analysis. *Lancet Oncol* 2013;**14**:1165–74.<http://ovidsp.ovid.com/ovidweb.cgi?T=JS&CSC=Y&NEWS=N&PAGE=fulltext&D=medl&AN=24131614>
- 5 Yabroff KR, Lund J, Kepka D, *et al*. Economic Burden of Cancer in the United States: Estimates, Projections, and Future Research. *Cancer Epidemiol Biomarkers Prev* 2011;**20**:2006–14.<Go to ISI>://WOS:000295717900003
- 6 Head MG, Fitchett JR, Cooke MK, *et al*. UK investments in global infectious disease research 1997-2010: A case study. *Lancet Infect Dis* 2013;**13**:55–64.
- 7 Head MG, Fitchett JR, Nageshwaran V, *et al*. Research Investments in Global Health: A Systematic Analysis of UK Infectious Disease Research Funding and Global Health Metrics, 1997–2013. *EBioMedicine* 2016;**3**:180–90.<http://dx.doi.org/10.1016/j.ebiom.2015.12.016>
- 8 Head MG, Fitchett JR, Derrick G, *et al*. Comparing research investment to United Kingdom institutions and published outputs for tuberculosis, HIV and malaria: a systematic analysis across 1997-2013. *Health Res Policy Syst* 2015;**13**:63.<http://www.health-policy-systems.com/content/13/1/63>
- 9 Murray CJL, Barber RM, Foreman KJ, *et al*. Global, regional, and national disability-adjusted life years (DALYs) for 306 diseases and injuries and healthy life expectancy (HALE) for 188 countries, 1990–2013: quantifying the epidemiological transition. *Lancet* 2015;**386**:2145–91.
- 10 Vos T, Barber RM, Bell B, *et al*. Global, regional, and national incidence, prevalence, and years lived with disability for 301 acute and chronic diseases and injuries in 188 countries, 1990–2013: a systematic analysis for the Global Burden of Disease Study 2013. *Lancet* 2015;**386**:743–800.
- 11 Murray CJ, Vos T, Lozano R, *et al*. Disability-adjusted life years (DALYs) for 291 diseases and injuries in 21 regions, 1990-2010: a systematic analysis for the Global Burden of Disease Study 2010. *Lancet* 2012;**380**:2197–223.<http://www.ncbi.nlm.nih.gov/pubmed/23245608>
- 12 Lozano R, Naghavi M, Foreman K, *et al*. Global and regional mortality from 235 causes of death for 20 age groups in 1990 and 2010: A systematic analysis for the Global Burden of Disease Study 2010. *Lancet* 2012;**380**:2095–128.

- 1  
2  
3 13 Jemal A, Bray F, Center MM, Ferlay J, Ward E FD. Global cancer statistics. *Cancer J Clin* 2011;**61**:69–90.  
4  
5  
6 14 Burnet NG, Jefferies SJ, Benson RJ, *et al*. Years of life lost (YLL) from cancer is an important  
7 measure of population burden--and should be considered when allocating research funds. *Br*  
8 *J Cancer* 2005;**92**:241–5.  
9  
10  
11 15 Carter AJR, Delarosa B, Hur H. An analysis of discrepancies between United Kingdom cancer  
12 research funding and societal burden and a comparison to previous and United States values.  
13 *Heal Res Policy Syst* 2015;**13**:62.<http://www.health-policy-systems.com/content/13/1/62>  
14  
15 16 Carter AJR, Nguyen CN. A comparison of cancer burden and research spending reveals  
16 discrepancies in the distribution of research funding. *BMC Public Health*  
17 2012;**12**:526.<http://dx.doi.org/10.1186/1471-2458-12-526>  
18  
19 17 Barton MB, Frommer M, Shafiq J. Role of radiotherapy in cancer control in low-income and  
20 middle-income countries. *Lancet Oncol* 2006;**7**:584–95.[http://ac.els-](http://ac.els-cdn.com/S1470204506707598/1-s2.0-S1470204506707598-main.pdf?_tid=41dac6b8-7fa0-11e3-a45c-0000aabb0f27&acdnat=1389981382_3394f8c1d926c07e5acaad4254556251)  
21 [cdn.com/S1470204506707598/1-s2.0-S1470204506707598-main.pdf?\\_tid=41dac6b8-7fa0-](http://ac.els-cdn.com/S1470204506707598/1-s2.0-S1470204506707598-main.pdf?_tid=41dac6b8-7fa0-11e3-a45c-0000aabb0f27&acdnat=1389981382_3394f8c1d926c07e5acaad4254556251)  
22 [11e3-a45c-0000aabb0f27&acdnat=1389981382\\_3394f8c1d926c07e5acaad4254556251](http://ac.els-cdn.com/S1470204506707598/1-s2.0-S1470204506707598-main.pdf?_tid=41dac6b8-7fa0-11e3-a45c-0000aabb0f27&acdnat=1389981382_3394f8c1d926c07e5acaad4254556251)  
23  
24  
25 18 Barton MB, Jacob S, Shafiq J, *et al*. Estimating the demand for radiotherapy from the  
26 evidence: a review of changes from 2003 to 2012. *Radiother Oncol* 2014;**112**:140–4.  
27  
28 19 Sullivan R, Alatise OI, Anderson BO, *et al*. Global cancer surgery: Delivering safe, affordable,  
29 and timely cancer surgery. *Lancet Oncol*. 2015;**16**:1193–224.  
30  
31 20 Gross CP, Anderson GF, Powe NR. The relation between funding by the National Institutes of  
32 Health and the burden of disease. *N Engl J Med* 1999;**340**:1881–7.  
33  
34 21 Lopez FC, Martin EA, Maleras RG, *et al*. Relationship between Research Funding in the  
35 Spanish National Health System and the Burden of Disease. *Rev Esp Salud Publica*  
36 2009;**83**:137–51.<Go to ISI>://WOS:000266635200011  
37  
38 22 Mitchell RJ, McClure RJ, Olivier J, *et al*. Rational allocation of Australia’s research dollars: does  
39 the distribution of NHMRC funding by National Health Priority Area reflect actual disease  
40 burden? *Med J Aust* 2009;**191**:648.  
41  
42 23 Lamarre-Cliche M, Castilloux AM, LeLorier J. Association between the burden of disease and  
43 research funding by the Medical Research Council of Canada and the National Institutes of  
44 Health. A cross-sectional study. *Clin Invest Med* 2001;**24**:83–  
45 9.<http://www.ncbi.nlm.nih.gov/pubmed/11368150>  
46  
47 24 Glover M, Buxton M, Guthrie S, *et al*. Estimating the returns to UK publicly funded cancer-  
48 related research in terms of the net value of improved health outcomes. *BMC Med*  
49 2014;**12**:1.  
50  
51 25 Luengo-Fernandez R, Leal J, Gray A. UK research spend in 2008 and 2012: comparing stroke,  
52 cancer, coronary heart disease and dementia. *BMJ Open* 2015;**5**:e006648.<http://dx.doi.org/>  
53  
54  
55  
56  
57  
58  
59  
60

- 1  
2  
3 26 Sussex J, Feng Y, Mestre-Ferrandiz J, *et al.* Quantifying the economic impact of government  
4 and charity funding of medical research on private research and development funding in the  
5 United Kingdom. *BMC Med* 2016;**14**:32.<http://dx.doi.org/10.1186/s12916-016-0564-z>  
6  
7 27 Teperek M. In conversation with Wellcome Trust and Cancer Research UK. Published Online  
8 First: 2016.<https://unlockingresearch.blog.lib.cam.ac.uk/?p=528>  
9  
10 28 Teperek M. Charities' perspective on research data management and sharing. Published  
11 Online First: 2016.<https://unlockingresearch.blog.lib.cam.ac.uk/?p=525>  
12  
13 29 Fitchett JRA, Sharara N, Head MG, *et al.* Transparency and availability of data for cancer  
14 research. *Lancet* 2016;**388**:866–7.[http://dx.doi.org/10.1016/S0140-6736\(16\)31427-1](http://dx.doi.org/10.1016/S0140-6736(16)31427-1)  
15  
16 30 Davies J, Yudkin JS, Atun R. Liberating data: the crucial weapon in the fight against NCDs.  
17 *Lancet Diabetes Endocrinol* 2016;**4**:197–8.[http://dx.doi.org/10.1016/S2213-8587\(16\)00037-1](http://dx.doi.org/10.1016/S2213-8587(16)00037-1)  
18  
19 31 CRUK. Annual report and accounts 2014/15. 2015.  
20 [http://www.cancerresearchuk.org/sites/default/files/annual\\_report\\_and\\_accounts\\_2014-](http://www.cancerresearchuk.org/sites/default/files/annual_report_and_accounts_2014-)  
21 15.pdf  
22  
23  
24  
25  
26  
27  
28  
29  
30  
31  
32  
33  
34  
35  
36  
37  
38  
39  
40  
41  
42  
43  
44  
45  
46  
47  
48  
49  
50  
51  
52  
53  
54  
55  
56  
57  
58  
59  
60

## Table Legends

**Table 1:** Cancer research investment awards and funding by site. All investment reported in 2013 UK pounds.

| Site of cancer     | All funders where investment data was available |                     |                       |                     |                         |                               | Cancer Research UK |                                            |
|--------------------|-------------------------------------------------|---------------------|-----------------------|---------------------|-------------------------|-------------------------------|--------------------|--------------------------------------------|
|                    | Number of awards                                | Percentage of total | Sum investment (£)    | Percentage of total | Mean award, £ (SD)      | Median award, £ (IQR)         | Number of awards   | Percentage of all oncology research awards |
| Breast             | 571                                             | 13.3%               | £137,960,107          | 5.8%                | 241611 (414584)         | 135752 (25000-216673)         | 273                | 8.3%                                       |
| Haematological     | 1158                                            | 26.9%               | £381,008,394          | 16.0%               | 329022 (476943)         | 186813 (120437-272324)        | 225                | 6.9%                                       |
| Colorectal         | 147                                             | 3.4%                | £77,279,857           | 3.2%                | 525713 (674881)         | 251800 (102078-819866)        | 205                | 6.2%                                       |
| Prostate           | 92                                              | 2.1%                | £135,290,779          | 5.7%                | 1470552 (6156372)       | 333757 (155227-721037)        | 123                | 3.7%                                       |
| Ovarian            | 48                                              | 1.1%                | £44,709,938           | 1.9%                | 931457 (3380145)        | 226764 (131990-627401)        | 112                | 3.4%                                       |
| Lung               | 82                                              | 1.9%                | £24,263,280           | 1.0%                | 295893 (556278)         | 146123 (66701-242934)         | 89                 | 2.7%                                       |
| Skin               | 87                                              | 2.0%                | £22,179,011           | 0.9%                | 254931 (453726)         | 85406 (69629-248603)          | 84                 | 2.6%                                       |
| Brain              | 22                                              | 0.5%                | £9,994,255            | 0.4%                | 454284 (498933)         | 401046 (196928-528008)        | 83                 | 2.5%                                       |
| Upper GI and       | 18                                              | 0.4%                | £19,094,230           | 0.8%                | 1060791 (1448010)       | 788850 (80964-1296962)        | 80                 | 2.4%                                       |
| Head and neck      | 20                                              | 0.5%                | £18,250,632           | 0.8%                | 912531 (1003091)        | 389751 (167358-1602465)       | 68                 | 2.1%                                       |
| Renal              | 19                                              | 0.4%                | £13,885,496           | 0.6%                | 730815 (678732)         | 479197 (244075-1252574)       | 48                 | 1.5%                                       |
| Bladder            | 10                                              | 0.2%                | £1,173,856            | 0.0%                | 117385 (106902)         | 94520 (29264- 173855)         | 48                 | 1.5%                                       |
| Cervical           | 26                                              | 0.6%                | £14,328,402           | 0.6%                | 551092 (877250)         | 210179 (88934-368402)         | 43                 | 1.3%                                       |
| Pancreatic         | 16                                              | 0.4%                | £9,453,577            | 0.4%                | 590848 (519850)         | 276237 (191804-1033948)       | 40                 | 1.2%                                       |
| Bone               | 13                                              | 0.3%                | £17,242,183           | 0.7%                | 1326322 (1604685)       | 685853 (243559-1999907)       | 29                 | 0.9%                                       |
| Liver              | 37                                              | 0.9%                | £25,037,541           | 1.0%                | 676690 (847151)         | 319082 (177974-776480)        | 20                 | 0.6%                                       |
| Mesothelioma       | 30                                              | 0.7%                | £4,476,088            | 0.2%                | 149202 (101201)         | 137103 (95895-205500)         | 11                 | 0.3%                                       |
| Cholangiocarcinoma | 2                                               | 0.0%                | £582,405              | 0.0%                | n/a                     | n/a                           | 11                 | 0.3%                                       |
| Testicular         | 14                                              | 0.3%                | £5,949,990            | 0.2%                | 424999 (507277)         | 242175 (102938-411010)        | 11                 | 0.3%                                       |
| Thyroid            | 4                                               | 0.1%                | £1,375,881            | 0.1%                | n/a                     | n/a                           | 7                  | 0.2%                                       |
| <b>Total</b>       | <b>4299</b>                                     |                     | <b>£2,388,152,318</b> |                     | <b>555513 (1429510)</b> | <b>231559 (114619-487063)</b> | <b>3284</b>        |                                            |



1  
2  
3  
4  
5  
6  
7  
8  
9  
10  
11  
12  
13  
14  
15  
16  
17  
18  
19  
20  
21  
22  
23  
24  
25  
26  
27  
28  
29  
30  
31  
32  
33  
34  
35  
36  
37  
38  
39  
40  
41  
42  
43  
44  
45  
46  
47  
48  
49

**Table 2:** Cancer research investment awards and funding by cross-cutting theme. All investment reported in 2013 UK pounds.

| Cross-cutting theme                  | All funders where investment data was available |                     |                       |                     |                         |                               | Cancer Research UK |                                            |
|--------------------------------------|-------------------------------------------------|---------------------|-----------------------|---------------------|-------------------------|-------------------------------|--------------------|--------------------------------------------|
|                                      | Number of awards                                | Percentage of total | Sum investment (£)    | Percentage of total | Mean award, £ (SD)      | Median award, £ (IQR)         | Number of awards   | Percentage of all oncology research awards |
| Pathogenesis (mechanism)             | 227                                             | 5.3%                | £1,374,387,838        | 57.6%               | 543881 (955710)         | 248573 (135752-506232)        | 1674               | 51.0%                                      |
| Drug Therapy                         | 1104                                            | 25.7%               | £620,961,060          | 26.0%               | 562464 (1910050)        | 202342 (105622-436559)        | 935                | 28.5%                                      |
| Diagnostic, Screening and Monitoring | 681                                             | 15.8%               | £359,618,823          | 15.1%               | 528074 (1155156)        | 205728 (102672-513836)        | 404                | 12.3%                                      |
| Women's Health                       | 640                                             | 14.9%               | £199,534,693          | 8.4%                | 311773 (1041520)        | 153845 (56515-227202)         | 287                | 8.7%                                       |
| Immunology (inc. biologics)          | 451                                             | 10.5%               | £194,086,617          | 8.1%                | 430347 (760955)         | 240052 (125669-466250)        | 212                | 6.5%                                       |
| Radiotherapy                         | 112                                             | 2.6%                | £88,262,353           | 3.7%                | 788056 (2413445)        | 243333 (106175-439419)        | 209                | 6.4%                                       |
| Psychosocial                         | 117                                             | 2.7%                | £23,445,835           | 1.0%                | 200391 (352410)         | 87463 (27317-239059)          | 122                | 3.7%                                       |
| Men's Health                         | 111                                             | 2.6%                | £143,392,908          | 6.0%                | 1291828 (5617919)       | 285203 (126037-700353)        | 120                | 3.7%                                       |
| Paediatrics                          | 175                                             | 4.1%                | £62,641,938           | 2.6%                | 357953 (547484)         | 183099 (89522-322261)         | 118                | 3.6%                                       |
| Surgery                              | 72                                              | 1.7%                | £37,900,334           | 1.6%                | 526393 (684908)         | 235413 (97890-761651)         | 95                 | 2.9%                                       |
| Infection-associated                 | 129                                             | 3.0%                | £56,819,379           | 2.4%                | 440460 (798013)         | 231836 (134693-439378)        | 48                 | 1.5%                                       |
| Global Health                        | 12                                              | 0.3%                | £6,434,960            | 0.3%                | 536246 (1089118)        | 129738 (77519-459274)         | 12                 | 0.4%                                       |
| Geriatrics                           | 7                                               | 0.2%                | £1,616,394            | 0.1%                | 230913 (254925)         | 121623 (76421-262167)         | 8                  | 0.2%                                       |
| Occupational Health                  | 18                                              | 0.4%                | £2,576,841            | 0.1%                | 143157 (116928)         | 137103 (33857-199998)         | 8                  | 0.2%                                       |
| <b>Total</b>                         | <b>4299</b>                                     |                     | <b>£2,388,152,318</b> |                     | <b>555513 (1429510)</b> | <b>231559 (114619-487063)</b> | <b>3284</b>        |                                            |

**Table 3:** Cancer research investment awards and funding by type of science. All investment reported in 2013 UK pounds.

| Type of science     | All funders where investment data was available |                     |                       |                     |                         |                               | Cancer Research UK |                                            |
|---------------------|-------------------------------------------------|---------------------|-----------------------|---------------------|-------------------------|-------------------------------|--------------------|--------------------------------------------|
|                     | Number of awards                                | Percentage of total | Sum investment (£)    | Percentage of total | Mean award, £ (SD)      | Median award, £ (IQR)         | Number of awards   | Percentage of all oncology research awards |
| Pre-clinical        | 2845                                            | 66.2%               | £1,485,997,379        | 62.2%               | 522318 (1006600)        | 240974 (132188-490872)        | 1809               | 55.1%                                      |
| Phase I-III         | 303                                             | 7.0%                | £223,060,276          | 9.3%                | 736172 (3361312)        | 178535 (70934-502399)         | 647                | 19.7%                                      |
| Product development | 172                                             | 4.0%                | £104,214,364          | 4.4%                | 605897 (2213394)        | 193051 (75270-360813)         | 52                 | 1.6%                                       |
| Cross-disciplinary  | 441                                             | 10.3%               | £315,145,351          | 13.2%               | 714615 (1586882)        | 238523 (126589-703764)        | 328                | 10.0%                                      |
| Public health       | 512                                             | 11.9%               | £254,333,282          | 10.6%               | 496744 (1000757)        | 209364 (82870-383623)         | 443                | 13.5%                                      |
| Unable to specify   | 26                                              | 0.6%                | £5,401,666            | 0.2%                | n/a                     | n/a                           | 5                  | 0.2%                                       |
| <b>Total</b>        | <b>4299</b>                                     |                     | <b>£2,388,152,318</b> |                     | <b>555513 (1429510)</b> | <b>231559 (114619-487063)</b> | <b>3284</b>        |                                            |

**Table 4:** Cancer research investment awards and funding by funding agency (excluding CRUK). All investment reported in 2013 UK pounds.

| Funder                                | All funders where investment data was available |                     |                       |                     |                         |                               |
|---------------------------------------|-------------------------------------------------|---------------------|-----------------------|---------------------|-------------------------|-------------------------------|
|                                       | Number of awards                                | Percentage of total | Sum investment (£)    | Percentage of total | Mean award, £ (SD)      | Median award, £ (IQR)         |
| MRC                                   | 768                                             | 17.9%               | £837,649,875          | 35.1%               | 1090690 (1770533)       | 504606 (305375-1153374)       |
| Charity (excluding Wellcome and CRUK) | 1,699                                           | 39.5%               | £415,189,093          | 17.4%               | 244372 (391813)         | 151912 (81000-223244)         |
| Department of Health                  | 586                                             | 13.6%               | £413,421,823          | 17.3%               | 705498 (2675223)        | 232173 (102391-471236)        |
| BBSRC                                 | 511                                             | 11.9%               | £223,651,002          | 9.4%                | 437673 (388793)         | 373356 (267848-501592)        |
| EPSRC                                 | 356                                             | 8.3%                | £201,861,623          | 8.5%                | 567027 (972696)         | 306906 (144056-604016)        |
| Wellcome                              | 193                                             | 4.5%                | £140,425,805          | 5.9%                | 727594 (1679370)        | 226761 (164547-427455)        |
| European Commission (inc ERC)         | 50                                              | 1.2%                | £78,757,447           | 3.3%                | 1575149 (731858)        | 1409678 (1252574-1830017)     |
| Other                                 | 136                                             | 3.2%                | £77,195,650           | 3.2%                | 567615 (1901202)        | 129944 (69309-263613)         |
| <b>Total</b>                          | <b>4299</b>                                     |                     | <b>£2,388,152,318</b> |                     | <b>555513 (1429510)</b> | <b>231559 (114619-487063)</b> |

**Table 5:** Compound ranking score for cancer research investment against 2013 global disease burdens, across mortality, YLDs, and DALYs, by cancer site.

| Disease      | Research investment (UK pound) by burden observed, 2013 |           |                             |                                |
|--------------|---------------------------------------------------------|-----------|-----------------------------|--------------------------------|
|              | Mean ranking across all burden metrics                  | Mortality | Years lived with disability | Disability-adjusted life years |
| Prostate     | 2.7                                                     | 2         | 4                           | 2                              |
| Ovarian      | 3.0                                                     | 4         | 2                           | 3                              |
| Mesothelioma | 4.0                                                     | 6         | 1                           | 5                              |
| Breast       | 4.0                                                     | 3         | 5                           | 4                              |
| Testicular   | 4.7                                                     | 1         | 3                           | 10                             |
| Skin         | 5.0                                                     | 5         | 9                           | 1                              |
| Colorectal   | 6.7                                                     | 7         | 7                           | 6                              |
| Renal        | 8.3                                                     | 8         | 10                          | 7                              |
| Cervical     | 9.7                                                     | 9         | 12                          | 8                              |
| Pancreatic   | 10.0                                                    | 12        | 6                           | 12                             |
| Brain        | 11.0                                                    | 11        | 11                          | 11                             |
| Thyroid      | 11.3                                                    | 10        | 15                          | 9                              |
| Liver        | 11.3                                                    | 13        | 8                           | 13                             |
| Lung         | 13.7                                                    | 14        | 13                          | 14                             |
| Upper GI     | 14.7                                                    | 15        | 14                          | 15                             |
| Bladder      | 16.0                                                    | 16        | 16                          | 16                             |

Supplementary Table 1: Investment per mortality observed for all site-specific cancers

|                          | Number of deaths |         |         | Investment per mortality observed |        |        |
|--------------------------|------------------|---------|---------|-----------------------------------|--------|--------|
|                          | 2005             | 2010    | 2013    | 2005                              | 2010   | 2013   |
| Bladder                  | 156385           | 170700  | 173900  | £0.03                             | £0.26  | £0.49  |
| Brain                    | 177191           | 195500  | 203900  | £0.00                             | £2.02  | £2.76  |
| Breast                   | 407108           | 438700  | 471000  | £5.35                             | £18.20 | £20.30 |
| Cervical                 | 221578           | 225400  | 235700  | £2.93                             | £5.63  | £4.50  |
| Colorectal               | 644648           | 714600  | 771000  | £3.54                             | £5.45  | £6.77  |
| Liver                    | 715141           | 752100  | 818000  | £0.04                             | £1.00  | £1.45  |
| Lung                     | 1391577          | 1527100 | 1639600 | £0.15                             | £0.57  | £1.08  |
| Mesothelioma             | 22128            | n/a     | 33700   | £0.81                             | ?      | £8.33  |
| Ovarian                  | 134354           | 160500  | 157800  | £23.00                            | £20.98 | £19.79 |
| Pancreatic               | 276753           | 310200  | 352400  | £0.56                             | £0.86  | £1.67  |
| Prostate                 | 225081           | 256000  | 292700  | £53.92                            | £45.19 | £34.22 |
| Renal                    | 113048           | 162100  | 133800  | £0.00                             | £2.27  | £5.96  |
| Skin                     | ?                | 79700   | 96100   | ?                                 | £14.20 | £16.30 |
| Testicular               | 7547             | 7700    | 8300    | £7.27                             | £44.69 | £55.14 |
| Thyroid                  | 29092            | 36000   | 33700   | £0.00                             | £1.70  | £3.14  |
| Upper GI and oesophageal | 1229320          | 1130100 | 1281200 | £0.93                             | £1.18  | £1.03  |

Supplementary Table 2: Investment per YLD observed for all site-specific cancers

|                          | YLD    |        |         | Investment per YLD observed |        |        |
|--------------------------|--------|--------|---------|-----------------------------|--------|--------|
|                          | 2005   | 2010   | 2013    | 2005                        | 2010   | 2013   |
| Bladder                  | 153647 | 125000 | 179800  | £0.05                       | £0.35  | £0.47  |
| Brain                    | 105126 | 94000  | 121900  | £0.00                       | £4.20  | £4.61  |
| Breast                   | 885550 | 898000 | 1068200 | £3.93                       | £8.89  | £8.95  |
| Cervical                 | 242359 | 111000 | 243800  | £4.28                       | £11.44 | £4.35  |
| Colorectal               | 561019 | 564000 | 701900  | £6.50                       | £6.91  | £7.44  |
| Liver                    | 160071 | 140000 | 190600  | £0.29                       | £5.39  | £6.24  |
| Lung                     | 388206 | 355000 | 467400  | £0.86                       | £2.44  | £3.78  |
| Mesothelioma             | 7109   | n/a    | 10800   | £4.04                       | ?      | £25.98 |
| Ovarian                  | 31339  | 63000  | 134900  | £157.75                     | £53.44 | £23.15 |
| Pancreatic               | 57317  | 37000  | 73600   | £4.35                       | £7.18  | £8.01  |
| Prostate                 | 690602 | 464000 | 893700  | £28.12                      | £24.93 | £11.21 |
| Renal                    | 112449 | 79000  | 139200  | £0.00                       | £4.66  | £5.72  |
| Skin                     | ?      | 300000 | 264100  | ?                           | £3.77  | £5.93  |
| Testicular               | 31339  | 12000  | 34300   | £2.80                       | £28.67 | £13.34 |
| Thyroid                  | 109078 | 48000  | 127600  | £0.00                       | £1.27  | £0.83  |
| Upper GI and oesophageal | 382757 | 304000 | 416100  | £4.77                       | £4.39  | £3.17  |

Supplementary Table 3: Investment per DALY observed for all site-specific cancers

|                          | Global DALYs |          |          | Investment per DALY observed |       |       |
|--------------------------|--------------|----------|----------|------------------------------|-------|-------|
|                          | 2005         | 2010     | 2013     | 2005                         | 2010  | 2013  |
| Bladder                  | 2987377      | 3015000  | 3139900  | £0.00                        | £0.01 | £0.03 |
| Brain                    | 6163358      | 6060000  | 6692200  | £0.00                        | £0.07 | £0.08 |
| Breast                   | 11762493     | 12018000 | 13258700 | £0.19                        | £0.66 | £0.72 |
| Cervical                 | 6775622      | 6440000  | 6914700  | £0.10                        | £0.20 | £0.15 |
| Colorectal               | 13747947     | 14422000 | 15794100 | £0.17                        | £0.27 | £0.33 |
| Liver                    | 19175329     | 19111000 | 20888700 | £0.00                        | £0.04 | £0.06 |
| Lung                     | 30791630     | 32405000 | 34732900 | £0.01                        | £0.03 | £0.05 |
| Mesothelioma             | 504037       | n/a      | 763500   | £0.04                        | ?     | £0.37 |
| Ovarian                  | 3541657      | 4118000  | 4056500  | £0.87                        | £0.82 | £0.77 |
| Pancreatic               | 5704661      | 6161000  | 7029100  | £0.03                        | £0.04 | £0.08 |
| Prostate                 | 3812057      | 3787000  | 4768800  | £3.18                        | £3.05 | £2.10 |
| Renal                    | 2810156      | 3676000  | 3150300  | £0.00                        | £0.10 | £0.25 |
| Skin                     | ?            | 1967000  | 237200   | ?                            | £0.58 | £6.61 |
| Testicular               | 354875       | 313000   | 3787700  | £0.15                        | £1.10 | £0.12 |
| Thyroid                  | 764526       | 836000   | 851900   | £0.00                        | £0.07 | £0.12 |
| Upper GI and oesophageal | 27964269     | 25356000 | 27749600 | £0.04                        | £0.05 | £0.05 |

Supplementary Figure 1: Investment per YLD (£/YLD) for 8 indicator site-specific cancers

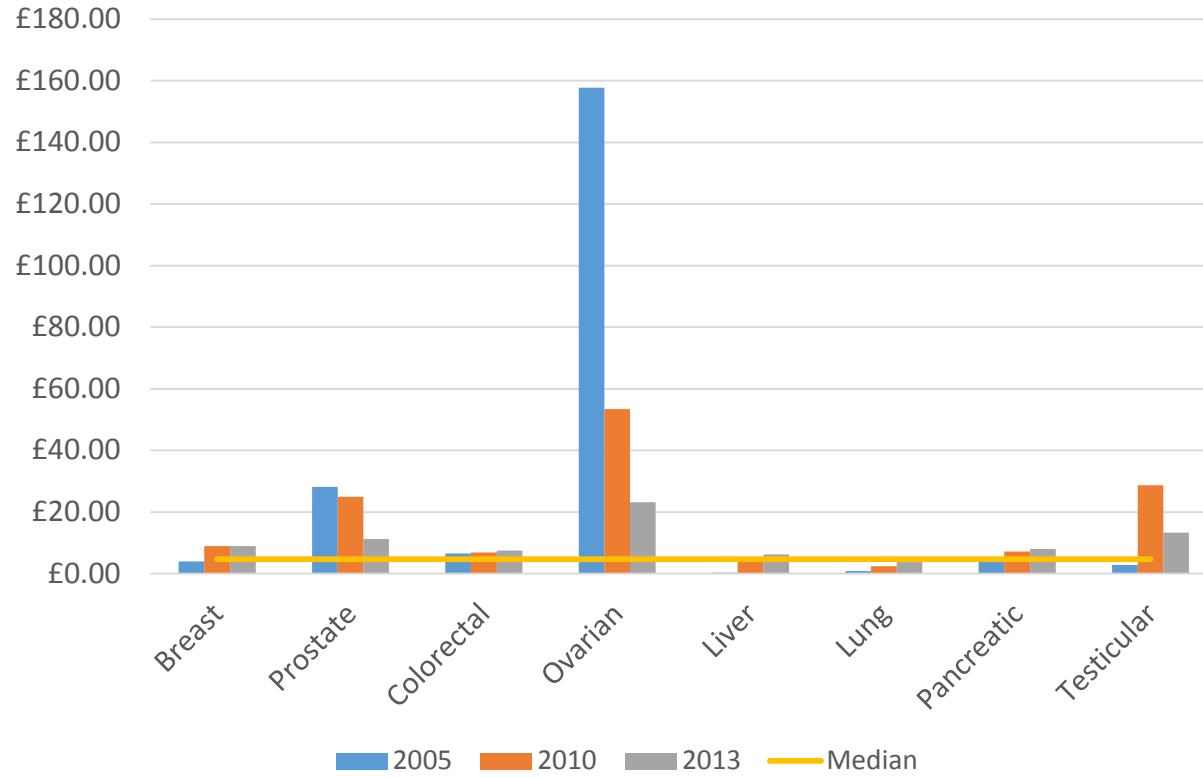

only



1  
2  
3  
4  
5  
6  
7  
8  
9  
10  
11  
12  
13  
14  
15  
16  
17  
18  
19  
20  
21  
22  
23  
24  
25  
26  
27  
28  
29  
30  
31  
32  
33  
34  
35  
36  
37  
38  
39  
40  
41  
42  
43  
44  
45  
46  
47

Supplementary Figure 1: Investment per death (£/death) for 8 indicator site-specific cancers



only

Supplementary Figure 1: Investment per DALY (£/DALY) for 8 indicator site-specific cancers



only

1  
2  
3  
4  
5  
6  
7  
8  
9  
10  
11  
12  
13  
14  
15  
16  
17  
18  
19  
20  
21  
22  
23  
24  
25  
26  
27  
28  
29  
30  
31  
32  
33  
34  
35  
36  
37  
38  
39  
40  
41  
42  
43  
44  
45  
46  
47
