# Supplementary material for: Investments in cancer research awarded to UK institutions and the global burden of cancer 2000–2013: a systematic analysis
Source: PubMed Central journal article supplement — BMJ Open. 2017 Apr 20;7(4):e013936. doi: 10.1136/bmjopen-2016-013936 (PMC5775472; doi:10.1136/bmjopen-2016-013936), 2017-04-20

**Supplementary Figure 1: Investment per YLD (£/YLD) for 8 indicator site-specific cancers**

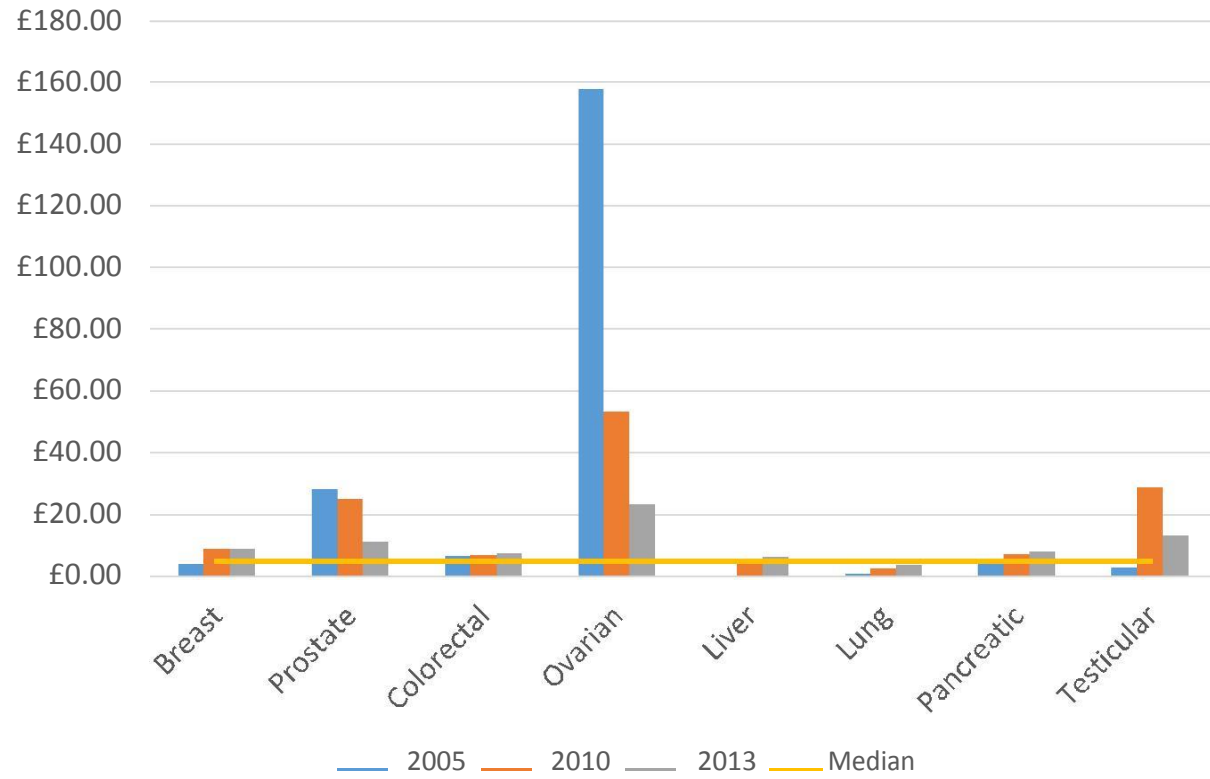

**Supplementary Figure 2: Investment per death (£/death) for 8 indicator site-specific cancers**

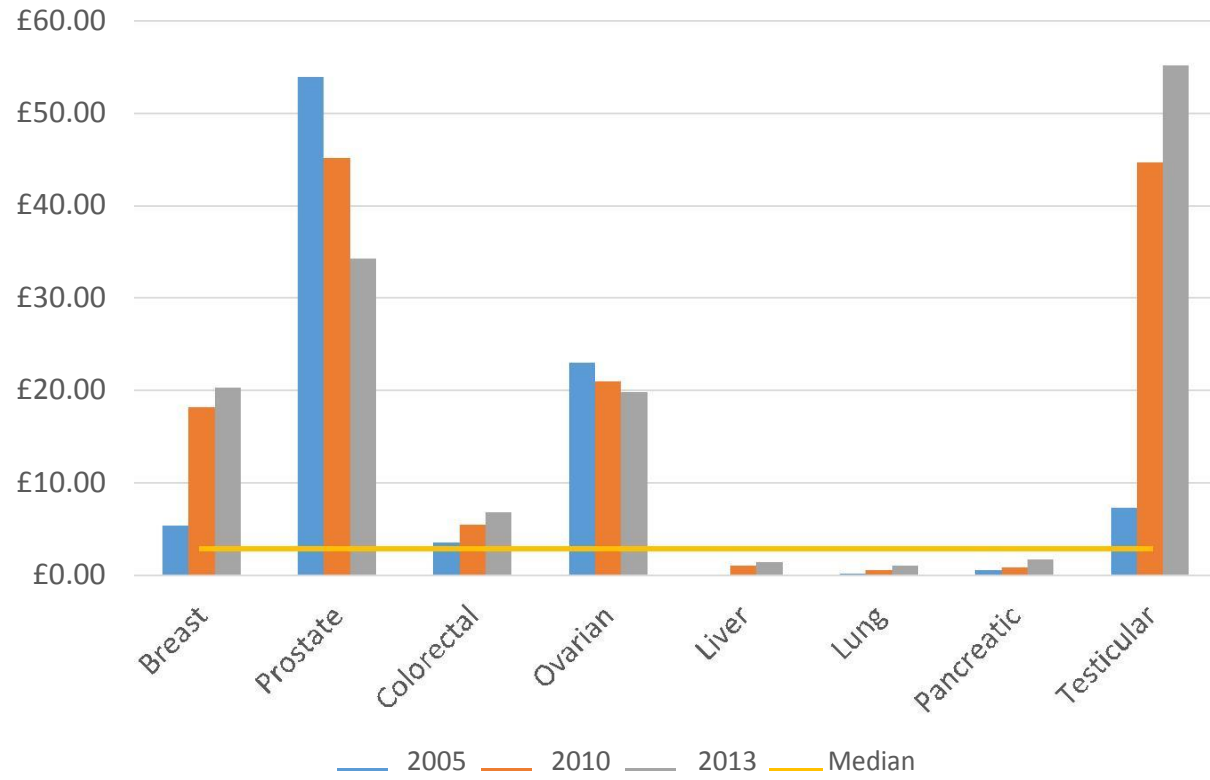

**Supplementary Figure 3: Investment per DALY (£/DALY) for 8 indicator site-specific cancers**

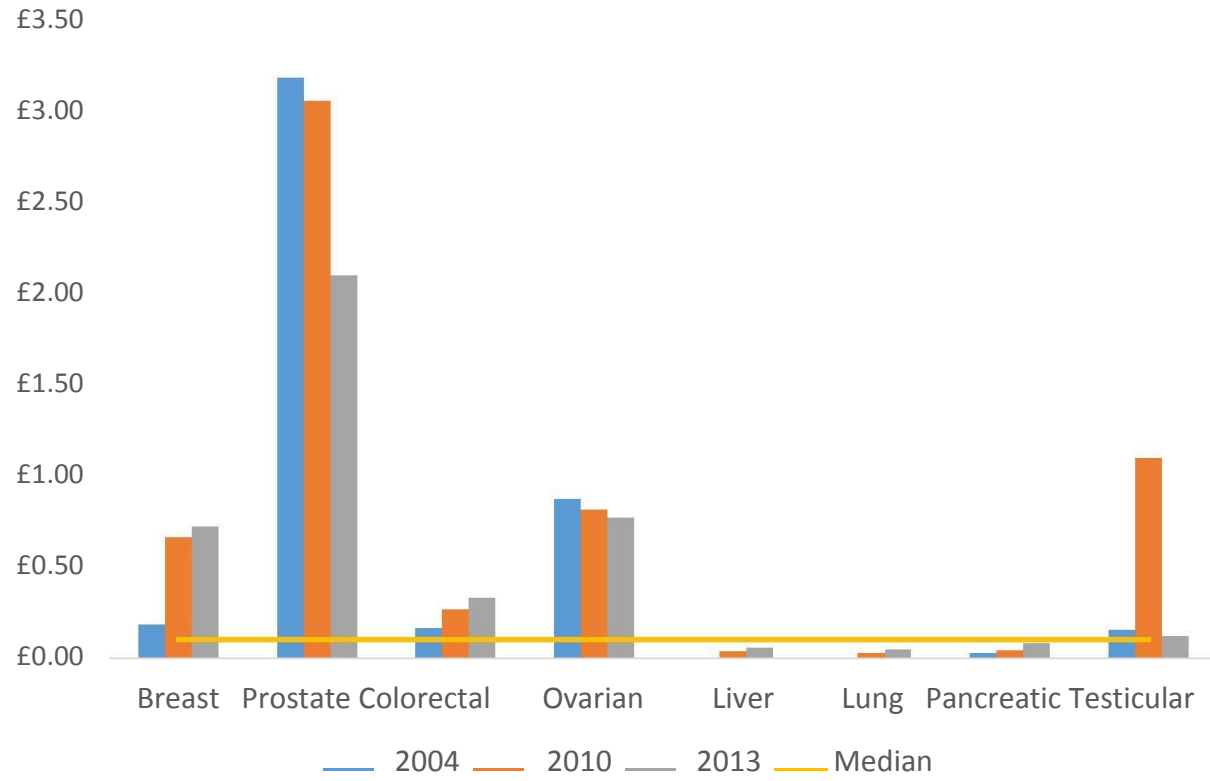

Supplement: bmjopen-2016-013936supp001.pdf [file bmjopen-2016-013936supp001.pdf]
