# Supplementary material for: Investments in cancer research awarded to UK institutions and the global burden of cancer 2000–2013: a systematic analysis
Source: PubMed Central journal article supplement — BMJ Open. 2017 Apr 20;7(4):e013936. doi: 10.1136/bmjopen-2016-013936 (PMC5775472; doi:10.1136/bmjopen-2016-013936), 2017-04-20
Supplement: bmjopen-2016-013936supp002.pdf [file bmjopen-2016-013936supp002.pdf]

**Supplementary Table 1: Investment per mortality observed for all site-specific cancers**

|                          | Number of deaths |         |         | Investment per mortality observed |        |        |
|--------------------------|------------------|---------|---------|-----------------------------------|--------|--------|
|                          | 2005             | 2010    | 2013    | 2005                              | 2010   | 2013   |
| Bladder                  | 156385           | 170700  | 173900  | £0.03                             | £0.26  | £0.49  |
| Brain                    | 177191           | 195500  | 203900  | £0.00                             | £2.02  | £2.76  |
| Breast                   | 407108           | 438700  | 471000  | £5.35                             | £18.20 | £20.30 |
| Cervical                 | 221578           | 225400  | 235700  | £2.93                             | £5.63  | £4.50  |
| Colorectal               | 644648           | 714600  | 771000  | £3.54                             | £5.45  | £6.77  |
| Liver                    | 715141           | 752100  | 818000  | £0.04                             | £1.00  | £1.45  |
| Lung                     | 1391577          | 1527100 | 1639600 | £0.15                             | £0.57  | £1.08  |
| Mesothelioma             | 22128            | n/a     | 33700   | £0.81                             | ?      | £8.33  |
| Ovarian                  | 134354           | 160500  | 157800  | £23.00                            | £20.98 | £19.79 |
| Pancreatic               | 276753           | 310200  | 352400  | £0.56                             | £0.86  | £1.67  |
| Prostate                 | 225081           | 256000  | 292700  | £53.92                            | £45.19 | £34.22 |
| Renal                    | 113048           | 162100  | 133800  | £0.00                             | £2.27  | £5.96  |
| Skin                     | ?                | 79700   | 96100   | ?                                 | £14.20 | £16.30 |
| Testicular               | 7547             | 7700    | 8300    | £7.27                             | £44.69 | £55.14 |
| Thyroid                  | 29092            | 36000   | 33700   | £0.00                             | £1.70  | £3.14  |
| Upper GI and oesophageal | 1229320          | 1130100 | 1281200 | £0.93                             | £1.18  | £1.03  |

**Supplementary Table 2: Investment per YLD observed for all site-specific cancers**

|                          | YLD    |        |         | Investment per YLD observed |        |        |
|--------------------------|--------|--------|---------|-----------------------------|--------|--------|
|                          | 2005   | 2010   | 2013    | 2005                        | 2010   | 2013   |
| Bladder                  | 153647 | 125000 | 179800  | £0.05                       | £0.35  | £0.47  |
| Brain                    | 105126 | 94000  | 121900  | £0.00                       | £4.20  | £4.61  |
| Breast                   | 885550 | 898000 | 1068200 | £3.93                       | £8.89  | £8.95  |
| Cervical                 | 242359 | 111000 | 243800  | £4.28                       | £11.44 | £4.35  |
| Colorectal               | 561019 | 564000 | 701900  | £6.50                       | £6.91  | £7.44  |
| Liver                    | 160071 | 140000 | 190600  | £0.29                       | £5.39  | £6.24  |
| Lung                     | 388206 | 355000 | 467400  | £0.86                       | £2.44  | £3.78  |
| Mesothelioma             | 7109   | n/a    | 10800   | £4.04                       | ?      | £25.98 |
| Ovarian                  | 31339  | 63000  | 134900  | £157.75                     | £53.44 | £23.15 |
| Pancreatic               | 57317  | 37000  | 73600   | £4.35                       | £7.18  | £8.01  |
| Prostate                 | 690602 | 464000 | 893700  | £28.12                      | £24.93 | £11.21 |
| Renal                    | 112449 | 79000  | 139200  | £0.00                       | £4.66  | £5.72  |
| Skin                     | ?      | 300000 | 264100  | ?                           | £3.77  | £5.93  |
| Testicular               | 31339  | 12000  | 34300   | £2.80                       | £28.67 | £13.34 |
| Thyroid                  | 109078 | 48000  | 127600  | £0.00                       | £1.27  | £0.83  |
| Upper GI and oesophageal | 382757 | 304000 | 416100  | £4.77                       | £4.39  | £3.17  |

**Supplementary Table 3: Investment per DALY observed for all site-specific cancers**

|                          | Global DALYs |          |          | Investment per DALY observed |       |       |
|--------------------------|--------------|----------|----------|------------------------------|-------|-------|
|                          | 2005         | 2010     | 2013     | 2005                         | 2010  | 2013  |
| Bladder                  | 2987377      | 3015000  | 3139900  | £0.00                        | £0.01 | £0.03 |
| Brain                    | 6163358      | 6060000  | 6692200  | £0.00                        | £0.07 | £0.08 |
| Breast                   | 11762493     | 12018000 | 13258700 | £0.19                        | £0.66 | £0.72 |
| Cervical                 | 6775622      | 6440000  | 6914700  | £0.10                        | £0.20 | £0.15 |
| Colorectal               | 13747947     | 14422000 | 15794100 | £0.17                        | £0.27 | £0.33 |
| Liver                    | 19175329     | 19111000 | 20888700 | £0.00                        | £0.04 | £0.06 |
| Lung                     | 30791630     | 32405000 | 34732900 | £0.01                        | £0.03 | £0.05 |
| Mesothelioma             | 504037       | n/a      | 763500   | £0.04                        | ?     | £0.37 |
| Ovarian                  | 3541657      | 4118000  | 4056500  | £0.87                        | £0.82 | £0.77 |
| Pancreatic               | 5704661      | 6161000  | 7029100  | £0.03                        | £0.04 | £0.08 |
| Prostate                 | 3812057      | 3787000  | 4768800  | £3.18                        | £3.05 | £2.10 |
| Renal                    | 2810156      | 3676000  | 3150300  | £0.00                        | £0.10 | £0.25 |
| Skin                     | ?            | 1967000  | 237200   | ?                            | £0.58 | £6.61 |
| Testicular               | 354875       | 313000   | 3787700  | £0.15                        | £1.10 | £0.12 |
| Thyroid                  | 764526       | 836000   | 851900   | £0.00                        | £0.07 | £0.12 |
| Upper GI and oesophageal | 27964269     | 25356000 | 27749600 | £0.04                        | £0.05 | £0.05 |
